# Supplementary material for: Ugi reaction-assisted rapid assembly of affinity-based probes against potential protein tyrosine phosphatases
Source: Royal Society of Chemistry journal article supplement (doi:10.1039/c2cc31294h), 2012-01-01
Supplement: c2cc31294h.pdf [file c2cc31294h.pdf]

## Supporting Information

# Ugi Reaction-Assisted Rapid Assembly of Affinity-Based Probes (A/BPs) against Potential Protein Tyrosine Phosphatases (PTPs)

Jingyan Ge,<sup>a</sup> Xiamin Cheng<sup>a</sup>, Lay Pheng Tan<sup>b</sup> and Shao Q. Yao<sup>\*a,c</sup>

<sup>a</sup>Department of Chemistry, <sup>b</sup>Department of Biological Sciences, <sup>c</sup>Medicinal Chemistry Program of the Life Science Institute, National University of Singapore, 3 Science Drive 3, Singapore 117543, Republic of Singapore

\*Correspondence: [chmyaosq@nus.edu.sg](mailto:chmyaosq@nus.edu.sg)

## Contents

|                                                             |            |
|-------------------------------------------------------------|------------|
| <b>1. General information</b>                               | <b>S1</b>  |
| <b>2. Synthetic procedures for aldehyde and isonitrile</b>  | <b>S2</b>  |
| <b>3. Procedure and LC-MS profiles of probes' synthesis</b> | <b>S7</b>  |
| <b>4. Procedures and results of inhibition assay</b>        | <b>S20</b> |
| <b>5. Procedures and results of labeling experiments</b>    | <b>S22</b> |
| <b>6. References</b>                                        | <b>S26</b> |
| <b>7. <sup>1</sup>H and <sup>13</sup>C NMR spectra</b>      | <b>S27</b> |

### 1. General Information

All chemicals were purchased from commercial vendors and used without further purification, unless otherwise noted. <sup>1</sup>H and <sup>13</sup>C NMR spectra were recorded on a Bruker 300 MHz, 500 MHz or DPX-300 NMR spectrometer. Chemical shifts are reported in parts per million referenced with respect to residual solvent (CHCl<sub>3</sub> = 7.26 ppm and DMSO-*d*<sub>6</sub> = 2.5 ppm) or from internal standard tetramethylsilane (Si(CH<sub>3</sub>)<sub>4</sub> = 0.00 ppm). The following abbreviations were used in reporting spectra: s = singlet, d = doublet, t = triplet, q = quarter, qn = quintet, m = multiplet, dd = doublet of doublets, br = broad. All solvents used were of HPLC grade, all reactions

requiring anhydrous conditions were conducted under a nitrogen or argon atmosphere in flame dried glassware. All LC-IT-TOF profiles and mass spectra were recorded on a Shimadzu LC-IT-TOF system equipped with an autosampler, using reverse-phase Phenomenex Luna 5 C<sub>18</sub> (2) 100 Å 50 × 3.0 mm column. Eluent A (0.1% trifluoroacetic acid/acetonitrile) and B (0.1% trifluoroacetic acid/water) were used as the mobile phase. The flow rate is 0.6 mL/min. All the enzymes were expressed in *E. coli* strain BL21-DE3 and purified by Ni-NTA technology. For enzyme activity measurements, Biotek microplate reader was used. IC<sub>50</sub> curves were generated using the Graphpad Prism software v5 (GraphPad, San Diego, USA). Fluorescence scanning of the SDS-PAGE gels was carried out with Typhoon 9200 fluorescence gel scanner (GE Healthcare) and the bands were quantified with ImageQuant software installed on the scanner.

## 2. Synthetic procedures for aldehyde and isonitrile

### 2.1 Synthesis of aldehyde warhead

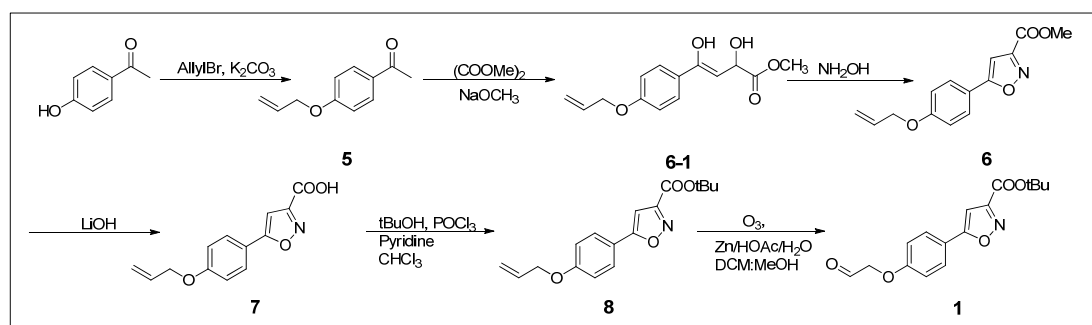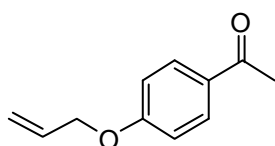

#### 1-(4-(allyloxy)phenyl)ethanone (5)

*p*-Hydroxyacetophenone (2.0 g, 14.7 mmol) was dissolved in acetonitrile (30 mL). K<sub>2</sub>CO<sub>3</sub> (4.06 g, 29.7 mmol) and allyl bromide (2.13 g, 17.6 mmol) were added into the solution. The reaction was heated the reaction for 1 hour at 50 °C, after which the organic solvent was removed under reduced pressure. The residue was dissolved in EtOAc and washed with water, brine. The organic layer was dried over Na<sub>2</sub>SO<sub>4</sub> and the solvent was removed *in vacuo* to afford compound 5 (89%). <sup>1</sup>H-NMR (300 MHz, CDCl<sub>3</sub>) δ 7.89 (d, *J* = 8.88 Hz, 2H), 6.90 (d, *J* = 8.88 Hz, 2H), 5.95 - 6.08 (m, 1H), 5.39 (dd, *J*<sub>1</sub> = 16.42, *J*<sub>2</sub> = 1.47 Hz, 1H), 5.29 (dd, *J*<sub>1</sub> = 10.51 Hz, *J*<sub>2</sub> = 1.32 Hz, 1H), 5.56 (td, *J*<sub>1</sub> = 5.28 Hz, *J*<sub>2</sub> = 1.47 Hz, 2H), 2.51 (s, 3H). <sup>13</sup>C-NMR (75 MHz, CDCl<sub>3</sub>) δ 196.5, 162.3, 132.4, 130.4, 118.0, 114.2, 68.7, 26.2. IT-TOF: *m/z* [M+1]<sup>+</sup> calcd: 177.08, found: 177.09

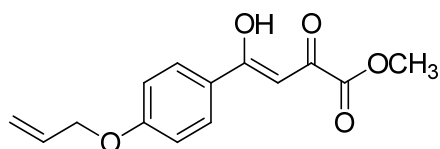

### Methyl 4-(4-(allyloxy)phenyl)-4-hydroxy-2-oxobut-3-enoate (**6-1**)<sup>[1]</sup>

To a solution of compound **5** (2.0 g, 11.4 mmol) and dimethyl oxalate (1.47 g, 12.4 mmol) in MeOH (in an ice bath) under a nitrogen atmosphere was added a freshly prepared NaOMe (12.5 mmol, 0.5 M in MeOH) in small portions. The reaction was subsequently refluxed for 24 hours before being cooled down to room temperature. Upon filtration of the white precipitate formed, the solution was collected, concentrated *in vacuo* to provide the desired product **6-1** (48%). <sup>1</sup>H-NMR (300 MHz, CDCl<sub>3</sub>) δ 7.97 (d, *J* = 8.85 Hz, 2H), 6.96 - 7.02 (m, 3H), 5.98 - 6.11 (m, 1H), 5.42 (dd, *J*<sub>1</sub> = 17.26 Hz, *J*<sub>2</sub> = 1.29 Hz, 1H), 5.32 (dd, *J*<sub>1</sub> = 10.44 Hz, *J*<sub>2</sub> = 1.23 Hz, 1H), 4.61 (d, *J* = 5.28 Hz, 2H), 3.92 (s, 3H). <sup>13</sup>C-NMR (75 MHz, CDCl<sub>3</sub>) δ 190.3, 167.8, 163.3, 162.9, 132.2, 130.3, 127.7, 118.3, 114.9, 97.8, 69.0, 53.1

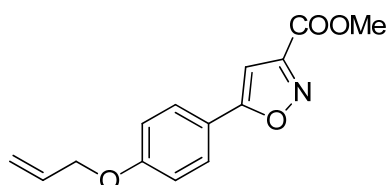

### Methyl 5-(4-(allyloxy)phenyl)isoxazole-3-carboxylate (**6**)

Compound **6-1** (0.64 g, 2.4 mmol) and NH<sub>2</sub>OH·H<sub>2</sub>O (0.17 g, 2.9 mmol) dissolved in MeOH was added a catalytic amount of TsOH·H<sub>2</sub>O (0.01 g, 0.05 mmol). The reaction mixture was refluxed for 24 hours. After being cooled down, the resulting white precipitate was collected by suction filtration and washed with a mixture of ice-cold MeOH and deionized water to provide the desired product **6** as a solid (80%). <sup>1</sup>H-NMR (300 MHz, CDCl<sub>3</sub>) δ 7.70 (d, *J* = 9.06 Hz, 2H), 6.97 (d, *J* = 9.06 Hz, 2H), 6.77 (s, 1H), 6.00-6.09 (m, 1H), 5.41 (dd, *J*<sub>1</sub> = 17.28 Hz, *J*<sub>2</sub> = 1.47 Hz, 1H), 5.30 (dd, *J*<sub>1</sub> = 10.53 Hz, *J*<sub>2</sub> = 1.17 Hz, 1H), 4.56 (d, *J* = 5.25 Hz, 2H), 3.97 (s, 3H). <sup>13</sup>C-NMR (75 MHz, CDCl<sub>3</sub>) δ 171.6, 160.5, 160.4, 156.5, 132.5, 127.4, 119.3, 118.0, 115.1, 98.4, 68.7, 52.7. IT-TOF: *m/z* [M+1]<sup>+</sup> calcd: 260.08, found: 260.06

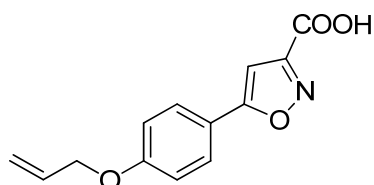

### 5-(4-(Allyloxy) phenyl) isoxazole-3-carboxylic acid (**7**)

Compound **6** (1 g, 3.9 mmol) was dissolved in MeOH and water (1:1; 10 ml) in an ice bath. LiOH (0.47 g, 19.5 mmol) in 0.5 ml water was added slowly into the solution. After 2 hours when TLC indicated the starting material was completely consumed, the solution was neutralized with 1 M HCl. The resulting white precipitate was collected, washed with water and chilled methanol to provide the

desired compound **7** (89%). <sup>1</sup>H-NMR (300 MHz, DMSO-*d*<sub>6</sub>) δ 7.87 (d, *J* = 8.70 Hz, 2H), 7.24 (s, 1H), 7.10 (d, *J* = 8.55 Hz, 2H), 5.99 - 6.11 (m, 1H), 5.41 (dd, *J*<sub>1</sub> = 17.26 Hz, *J*<sub>2</sub> = 1.15 Hz, 1H), 5.28 (dd, *J*<sub>1</sub> = 10.53 Hz, *J*<sub>2</sub> = 0.99 Hz, 1H), 4.65 (d, *J* = 5.10 Hz, 2H). <sup>13</sup>C-NMR (75 MHz, DMSO-*d*<sub>6</sub>) δ 170.8, 160.9, 160.1, 157.8, 133.2, 127.5, 119.0, 117.8, 115.4, 99.3, 68.4. IT-TOF: *m/z* [M+1]<sup>+</sup> calcd: 246.07, found: 246.06

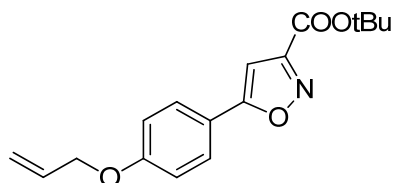

#### **Tert-butyl 5-(4-(allyloxy)phenyl)isoxazole-3-carboxylate(8)**

To a solution of compound **7** (500 mg, 2.0 mmol) in CHCl<sub>3</sub> was added *t*-BuOH (2 mL, 20 mmol) and pyridine (806 mg, 10.0 mmol) in an ice bath. After 5 min, POCl<sub>3</sub> (406 mg, 2.6 mmol) was slowly added into the solution. The reaction was stirred for 1 hour. Dichloromethane and 10 mL dilute HCl were poured into the solution. The organic layer was separated, washed with dilute HCl (10 mL × 2), water (10 mL × 2), and brine (10 mL × 2), dried over Na<sub>2</sub>SO<sub>4</sub>. The solvent was removed and the residue was purified by silica gel chromatography (10% - 35% EtOAc in hexane) to afford compound **8** as a white solid (85%). <sup>1</sup>H-NMR (300 MHz, CDCl<sub>3</sub>) δ 7.49 (d, *J* = 8.85 Hz, 2H), 6.99 (d, *J* = 9.02 Hz, 2H), 6.72 (s, 2H), 6.00 - 6.12 (m, 1H), 5.43 (dd, *J*<sub>1</sub> = 17.26, *J*<sub>2</sub> = 1.5 Hz, 1H), 5.32 (dd, *J*<sub>1</sub> = 10.53, *J*<sub>2</sub> = 1.32 Hz, 1H), 4.59 (d, *J* = 5.25 Hz, 2H), 1.63 (s, 9H). <sup>13</sup>C-NMR (75 MHz, CDCl<sub>3</sub>) δ 171.4, 160.5, 159.2, 158.1, 132.6, 127.5, 119.8, 118.1, 115.3, 98.6, 83.5, 68.9, 28.1. IT-TOF: *m/z* [M+1]<sup>+</sup> calcd: 302.13, found: 302.10

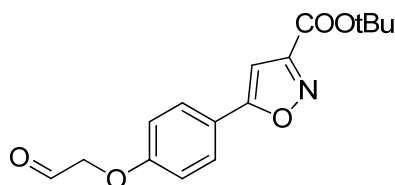

#### **Tert-butyl 5-(4-(2-oxoethoxy)phenyl)isoxazole-3-carboxylate(1)**

O<sub>3</sub> gas was bubbled into a solution of compound **8** (450 mg, 1.5 mmol) in DCM (10 mL) at -78 °C until the solution became blue. Excess O<sub>3</sub> was purged out using argon. Then, zinc dust (340 mg, 5.2 mmol) and a mixture of glacial AcOH and water (17:3; 360 μL) were added to the solution in small portions with vigorous stirring. Subsequently, the reaction mixture was allowed to warm to room temperature, followed by stirring for a further 1 hour. The reaction mixture was then neutralized and filter through Celite to remove any residual solids. The filtrate was extracted with DCM and the organic layer was washed with saturated NaHCO<sub>3</sub> and brine, dried over Na<sub>2</sub>SO<sub>4</sub> and concentrated *in vacuo*. The resulting crud product was purification by flash column chromatography (10% - 40% EtOAc in hexane) to afford the pure product **1** as an white solid (81%) <sup>1</sup>H-NMR (300 MHz, CDCl<sub>3</sub>) δ 9.81 (s, 1H), 7.68 (d, *J* = 8.88 Hz, 2H), 6.94 (d, *J* = 8.88 Hz, 2H), 6.70 (s, 1H), 4.63

(d,  $J = 0.81$  Hz, 2H), 1.99 (s, 9H)  $\delta$   $^{13}\text{C}$ -NMR (75 MHz,  $\text{CDCl}_3$ )  $\delta$  197.8, 170.8, 159.2, 158.9, 157.9, 127.5, 120.5, 115.0, 98.8, 83.5, 72.4, 27.9. IT-TOF:  $m/z$   $[\text{M}+1]^+$  calcd: 304.11, found: 304.09

## 2.2 Synthesis of isonitrile

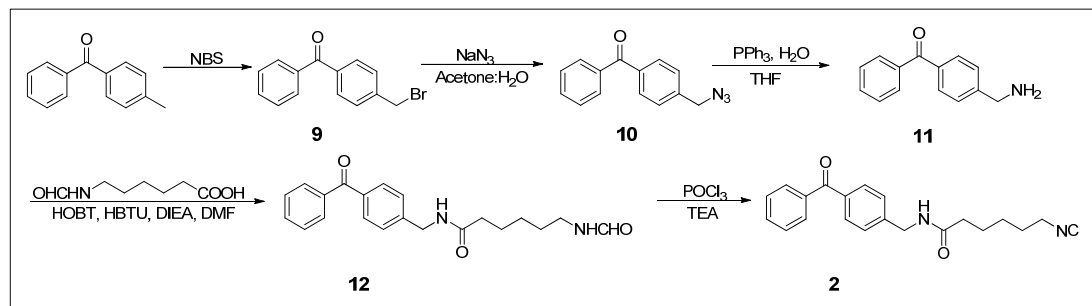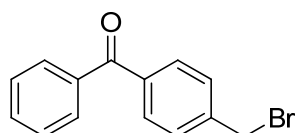

### (4-(bromomethyl)phenyl)(phenyl)methanone (9)

4-Methylbenzophenone (3 g, 15.3 mmol) and *N*-bromosuccinimide (2.72 g, 15.3 mmol) were dissolved in  $\text{CCl}_4$  (30 mL) solution. The reaction was placed under an IR lamp and the solution was refluxed for ~3 hours when monitoring of the reaction by TLC indicated the complete consumption of the starting material. The resulting solution was cooled down and the solid filtered off. Upon concentration *in vacuo* to remove half of the solvent, the resulting solution was added hexane, and left standing for recrystallization to occur. The resulting solid was collected to give pure compound **9** (78%).  $^1\text{H}$ -NMR (300 MHz,  $\text{CDCl}_3$ )  $\delta$  7.77 - 7.80 (m, 4H), 7.60 (t,  $J = 7.30$  Hz, 1H), 7.46 - 7.51 (m, 4H), 4.53 (s, 2H)  $^{13}\text{C}$ -NMR (75 MHz,  $\text{CDCl}_3$ )  $\delta$  195.9, 142.0, 137.4, 137.3, 132.5, 130.5, 130.0, 128.9, 128.3, 32.2. IT-TOF:  $m/z$   $[\text{M}+1]^+$  calcd: 275.00, 277.00 found: 274.99, 276.99.

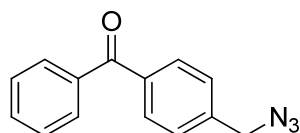

### (4-(Azidomethyl)phenyl)(phenyl)methanone (10)

To a stirred solution of **9** (1.5 g, 5.5 mmol) in 16 mL mixture of acetone:H<sub>2</sub>O (3:1) in an ice bath was added  $\text{NaN}_3$  (0.7 g, 11 mmol; dissolved in water). After 1 hour, some precipitates formed. Water (50 mL) was then added, and the resulting solution was filtered. The solid collected was washed with water and then dried *in vacuo* to afford compound **10** (96%).  $^1\text{H}$ -NMR (300 MHz,  $\text{CDCl}_3$ )  $\delta$  7.80 (t,  $J = 8.49$  Hz, 4H), 7.59 (t,  $J = 7.30$  Hz, 1H), 7.41 - 7.50 (m, 4H), 4.43 (s, 2H).  $^{13}\text{C}$ -NMR (75

MHz, CDCl<sub>3</sub>) δ 196.0, 139.8, 137.3, 132.5, 130.5, 130.0, 128.2, 127.7, 54.2. IT-TOF: m/z [M+1]<sup>+</sup> calcd: 238.09 found: 238.07.

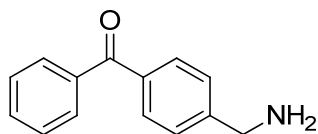

**(4-(aminomethyl)phenyl)(phenyl)methanone (11)**

**10** (0.5 g, 2.1 mmol) dissolved in THF (10 mL) was added H<sub>2</sub>O (0.16 g) at room temperature. PPh<sub>3</sub> was then added and the resulting solution was heated to 60 °C for 1 hour before being cooled down to 25 °C. Upon solvent removal under reduced pressure, the crude residue collected was subsequently purified by silica gel chromatography (30% EtOAc in hexane to 10% MeOH in DCM with 0.1% triethylamine) to give compound **11** (82%). <sup>1</sup>H-NMR (300 MHz, CDCl<sub>3</sub>) δ 7.72 - 7.74 (d, *J* = 8.20 Hz, 4H), 7.53 (t, *J* = 7.25 Hz, 1H), 7.38 - 7.42 (m, 4H), 3.91 (s, 2H), 1.20 (s, 2H). <sup>13</sup>C-NMR (75 MHz, CDCl<sub>3</sub>) δ 196.2, 147.5, 137.5, 135.9, 132.1, 130.2, 129.7, 128.1, 126.7, 45.8.

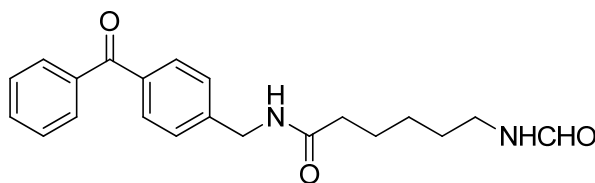

**N-(4-benzoylbenzyl)-6-formamido-hexanamide (12)**

6-formamido-hexanoic acid (0.40 g, 2.5 mmol) was pre-activated with HOBT (0.37 g, 2.75 mmol), HBTU (1.0 g, 2.75 mmol) and DIEA (0.38 g, 3 mmol) in 15 mL DMF. After 10 min, compound **11** (0.53g, 2.5 mmol) was added into the solution. The reaction was stirred further for 2 hours. Upon DMF removal *in vacuo*, the resulting residue was purified by silica gel chromatography (10% to 40% EtOAc in hexane) to yield compound **12** (84%). <sup>1</sup>H-NMR (300 MHz, CDCl<sub>3</sub>) δ 8.06 (s, 1H), 7.15 (t, *J* = 8.05 Hz, 4H), 7.57 (t, *J* = 7.40 Hz, 1H), 7.45 (t, *J* = 7.24 Hz, 2H), 7.34 (d, *J* = 8.22 Hz, 2H), 6.77 (br, 1H), 6.34 (br, 1H), 4.47 (d, *J* = 5.91 Hz, 2H), 3.25 (q, *J* = 6.66 Hz, 2H), 2.24 (t, *J* = 7.39 Hz, 2H), 1.64 (qn, *J* = 7.45 Hz, 2H), 1.49 (qn, *J* = 7.11 Hz, 2H), 1.31 (qn, *J* = 7.27 Hz, 2H). <sup>13</sup>C-NMR (75 MHz, CDCl<sub>3</sub>) δ 196.5, 173.3, 161.6, 143.3, 137.3, 136.4, 132.5, 130.3, 129.3, 128.3, 127.3, 43.1, 37.7, 36.1, 28.9, 26.2, 25.0. IT-TOF: m/z [M+1]<sup>+</sup> calcd: 354.18, found: 353.17

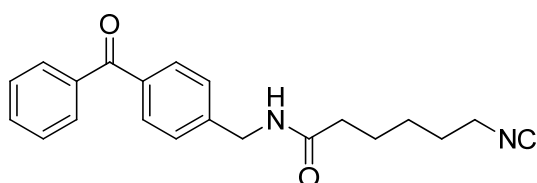

**N-(4-benzoylbenzyl)-6-isocyano-hexanamide (2)**

Compound **12** (1.0 g, 2.9 mmol) dissolved in anhydrous DCM in an ice bath was

added triethylamine (1.86 g, 18.4 mmol) and POCl<sub>3</sub> (0.91 g, 5.9 mmol). The solution was stirred for 30 min. Subsequently, 5% NaHCO<sub>3</sub> was added and the reaction was stirred further for another 10 min. The resulting solution was extracted by DCM. The combine organic layer was washed with brine and dried over Na<sub>2</sub>SO<sub>4</sub>. The crude residue was purified by silica gel chromatography (5% to 30% EtOAc in hexane) to provide compound **2** (81%). <sup>1</sup>H-NMR (300 MHz, CDCl<sub>3</sub>) δ 7.71 - 7.76 (m, 4H), 7.58 (t, *J* = 7.38 Hz, 1H), 7.46 (t, *J* = 7.20 Hz, 2H), 7.35 (d, *J* = 8.04 Hz, 2H), 6.23 (br, 1H), 4.49 (d, *J* = 5.91 Hz, 2H), 3.34 - 3.40 (m, 2H), 2.25 (t, *J* = 7.38 Hz, 2H), 1.65 - 1.75 (m, 2H), 1.48 - 1.50 (qn, *J* = 7.11 Hz, 2H). <sup>13</sup>C-NMR (75 MHz, CDCl<sub>3</sub>) δ 196.3, 172.6, 155.9, 143.2, 137.4, 136.6, 132.5, 130.4, 129.9, 128.3, 127.4, 43.1, 41.3, 36.0, 28.7, 25.9, 24.6. IT-TOF: *m/z* [M+1]<sup>+</sup> calcd: 335.17, found: 335.15

### 2.3 Synthesis of dye-azide

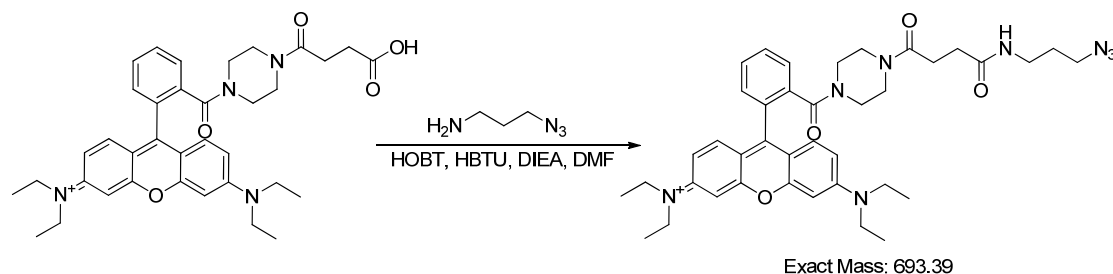

The acid (50 mg, 0.09 mmol; prepared based on reference 2) was pre-activated with HOBT (13.2 mg, 0.1 mmol), HBTU (37.2 mg, 0.1 mmol) and DIEA (18.55 mg, 0.1 mmol) in DMF for 10 min. Subsequently, 3-azidopropan-1-amine (9 mg, 0.09 mmol) was added and the resulting mixture was stirred for 2 hours. Upon DMF removal *in vacuo*, the residue was purified by flash chromatography (0.1% to 5% Methanol in DCM) to afford the desired rhodamine-N<sub>3</sub> (85%). ESI: *m/z* [M+1]<sup>+</sup> calcd: 694.4, found: 694.3.

## 3. Procedure and LC-MS profiles of probes' synthesis

### 3.1 General Procedure for the synthesis of probes

In 1.5 mL eppendorf tubes, a solution of amine (0.1 mmol, Table S1) was added into 400 μL MeOH. Then aldehyde **1** (0.1 mmol in 100 μL DMF) was added. After 1 hour, isonitrile **2** (0.1 mmol in 100 μL MeOH) and 5-Hexynoic acid (0.1 mmol in 100 μL MeOH) were added into the mixture. The reaction was stirred for ~9 hours. The crude residue was purified by semi-preparative reverse-phase HPLC. The product was next treated with 1 mL of a mixture of TFA/DCM (50/50) for 2 hours. TFA/DCM was next removed under reduced pressure with a GeneVac HT-4X Series II parallel evaporation system, affording the final product which was sufficiently pure and could be directly used in subsequent screening experiments. Yield (in two steps): 20 - 30%. Both LCMS and <sup>1</sup>H NMR were carried out to further characterize

the final products and ensure the correct ID and purity (Table S1).

### 3.2 Characterization of the Af/BPs.

**Table S1.** Summary of Af/BPs and their characterizations

| Amine structure                                                                                  | Probe structure                                                                                  | Calcd(M+1)<br>Found<br>Mass          | Purity<br>(LCMS) | <sup>1</sup> H NMR<br>(Y/N) |
|--------------------------------------------------------------------------------------------------|--------------------------------------------------------------------------------------------------|--------------------------------------|------------------|-----------------------------|
| 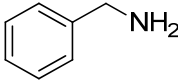<br><b>4a</b>   | <br><b>P1</b>   | Calcd:<br>783.33<br>Found:<br>783.30 | > 90%            | N                           |
| <br><b>4b</b>   | <br><b>P2</b>   | Calcd:<br>797.35<br>Found:<br>797.31 | > 85%            | Y                           |
| <br><b>4c</b> | <br><b>P3</b>  | Calcd:<br>811.36<br>Found:<br>811.32 | > 85%            | N                           |
| <br><b>4d</b> | <br><b>P4</b> | Calcd:<br>825.38<br>Found:<br>825.34 | > 85%            | Y                           |
| <br><b>4e</b> | <br><b>P5</b> | Calcd:<br>833.35<br>Found:<br>833.32 | > 90%            | N                           |
| <br><b>4f</b> | <br><b>P6</b> | Calcd:<br>873.25<br>Found:<br>873.34 | > 90%            | N                           |



|                                                                                                      |                                                                                                       |                                           |       |   |
|------------------------------------------------------------------------------------------------------|-------------------------------------------------------------------------------------------------------|-------------------------------------------|-------|---|
| 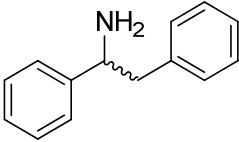 <p><b>4g</b></p>   |  <p><b>P7</b></p>    | Calcd:<br>873.38<br>Found:<br>873.35      | > 95% | N |
|  <p><b>4h</b></p>   |  <p><b>P8</b></p>    | Calcd:<br>887.39<br>Found:<br>887.37      | > 90% | N |
|  <p><b>4i</b></p>   |  <p><b>P9</b></p>    | Calcd:<br>817.29<br>Found:<br>817.26      | > 90% | Y |
|  <p><b>4j</b></p>  |  <p><b>P10</b></p>  | Calcd:<br>801.32<br>Found:<br>801.30      | > 85% | Y |
|  <p><b>4k</b></p> |  <p><b>P11</b></p> | Calcd:<br>861.24<br>Found:<br>863.21 (Br) | > 85% | Y |
|  <p><b>4l</b></p> |  <p><b>P12</b></p> | Calcd:<br>839.39<br>Found:<br>839.37      | > 90% | Y |
|  <p><b>4m</b></p> |  <p><b>P13</b></p> | Calcd:<br>851.32<br>Found:<br>851.29      | > 95% | Y |
|  <p><b>4n</b></p> |  <p><b>P14</b></p> | Calcd:<br>813.34<br>Found:<br>813.33      | > 90% | Y |

|                                                                                                      |                                                                                                       |                                           |       |   |
|------------------------------------------------------------------------------------------------------|-------------------------------------------------------------------------------------------------------|-------------------------------------------|-------|---|
| 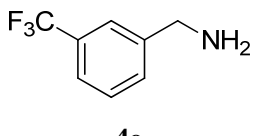 <p><b>4o</b></p>   |  <p><b>P15</b></p>   | Calcd:<br>851.32<br>Found:<br>851.28      | > 90% | Y |
|  <p><b>4p</b></p>   |  <p><b>P16</b></p>   | Calcd:<br>819.31<br>Found:<br>819.29      | > 90% | Y |
|  <p><b>4q</b></p>   |  <p><b>P17</b></p>   | Calcd:<br>819.31<br>Found:<br>819.29      | > 90% | N |
|  <p><b>4r</b></p>   |  <p><b>P18</b></p>  | Calcd:<br>827.32<br>Found:<br>827.30      | > 85% | Y |
|  <p><b>4s</b></p> |  <p><b>P19</b></p> | Calcd:<br>809.35<br>Found:<br>809.32      | > 95% | Y |
|  <p><b>4t</b></p> |  <p><b>P20</b></p> | Calcd:<br>861.34<br>Found:<br>861.30      | > 95% | Y |
|  <p><b>4u</b></p> |  <p><b>P21</b></p> | Calcd:<br>893.35<br>Found:<br>893.32      | > 95% | N |
|  <p><b>4v</b></p> |  <p><b>P22</b></p> | Calcd:<br>935.26<br>Found:<br>937.21 (Br) | > 85% | N |

|                                                                                                |                                                                                                                   |                                           |       |   |
|------------------------------------------------------------------------------------------------|-------------------------------------------------------------------------------------------------------------------|-------------------------------------------|-------|---|
| 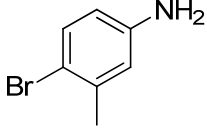<br><b>4w</b> | <p><b>P22</b></p> <br><b>P23</b> | Calcd:<br>861.24<br>Found:<br>863.22 (Br) | > 90% | N |
| <br><b>4x</b> | <p><b>P24</b></p> <br><b>P25</b> | Calcd:<br>820.38<br>Found:<br>820.36      | > 50% | Y |
| <br><b>4y</b> | <p><b>P25</b></p> <br><b>P25</b> | Calcd:<br>777.34<br>Found:<br>777.32      | > 60% | N |

### 3.2.1 LCMS Data

#### P1

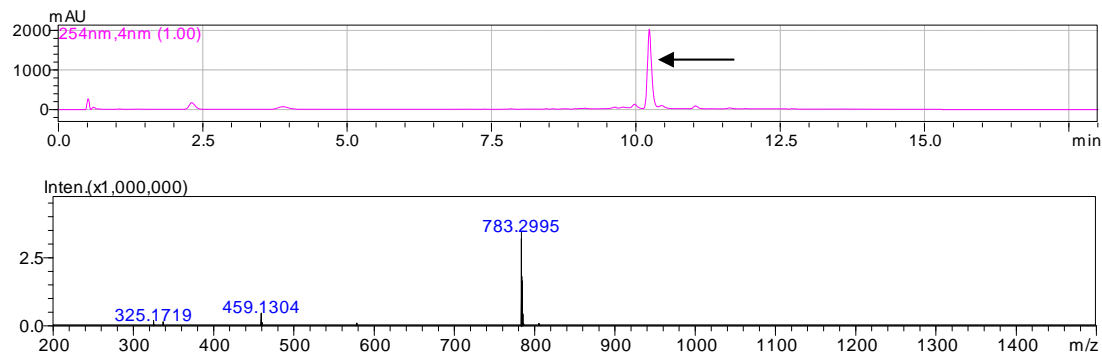

#### P2

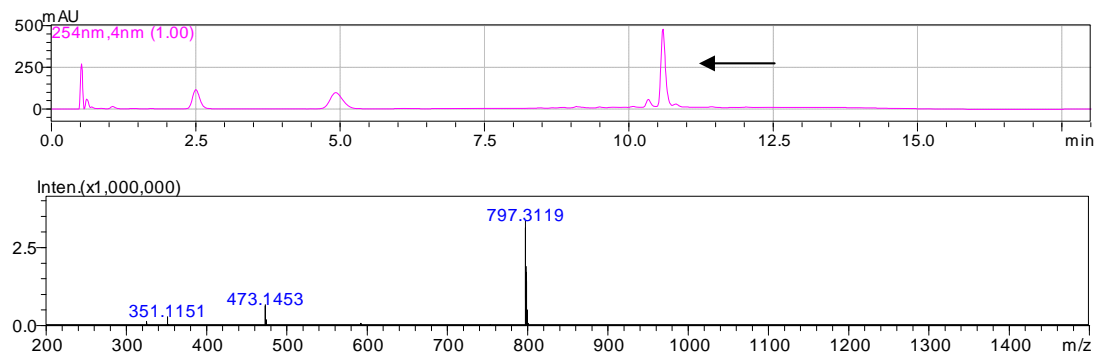

### P3

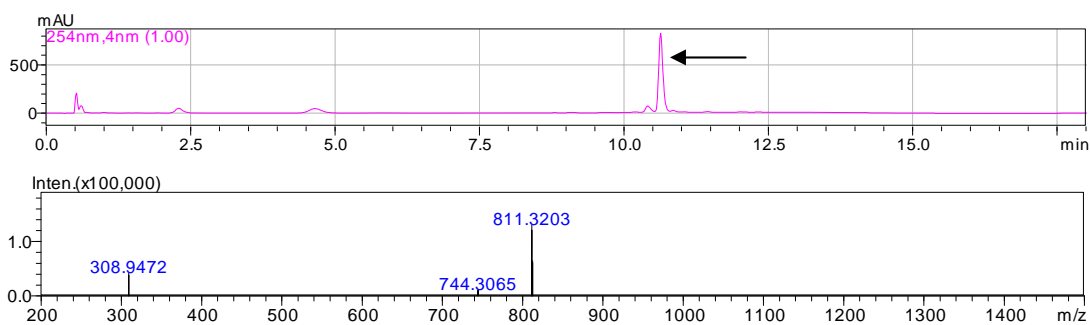

### P4

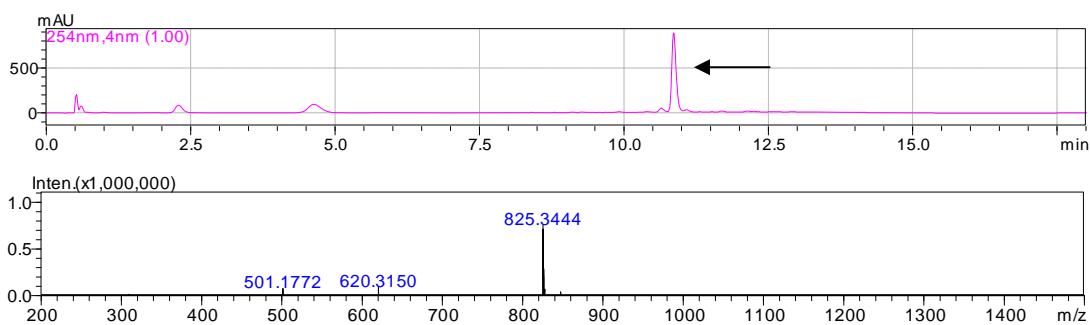

### P5

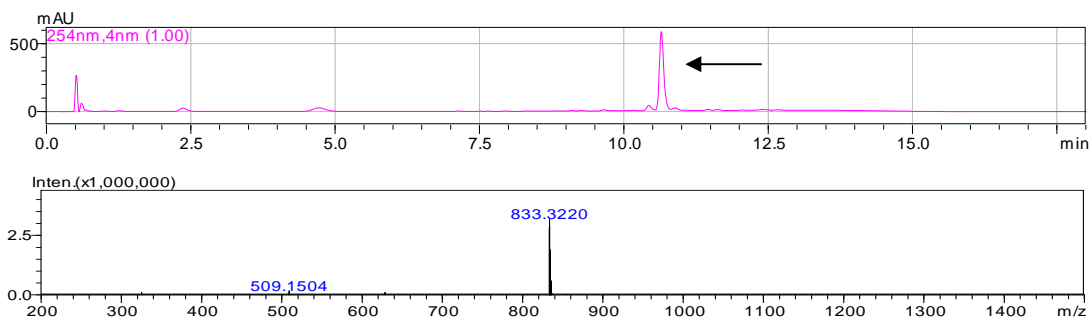

### P6

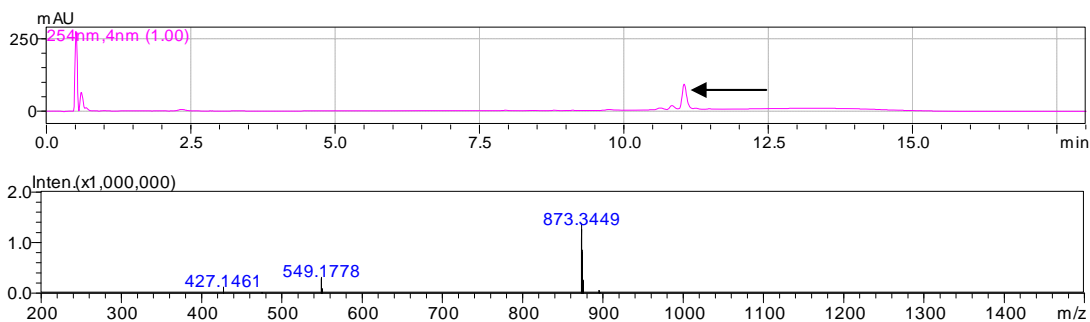

### P7

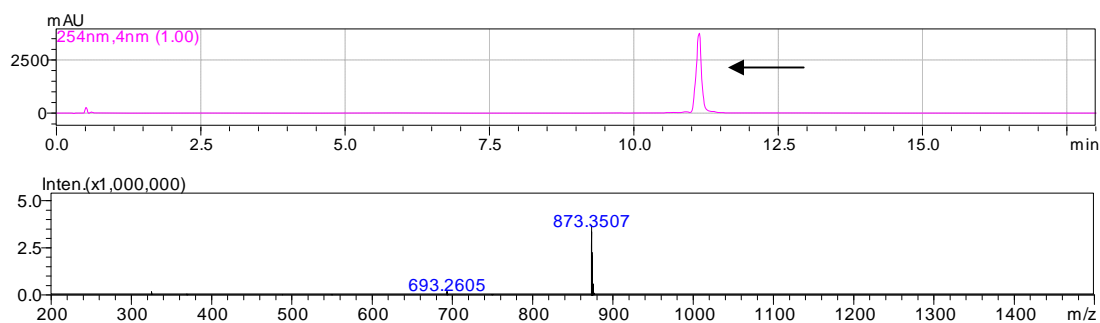

### P8

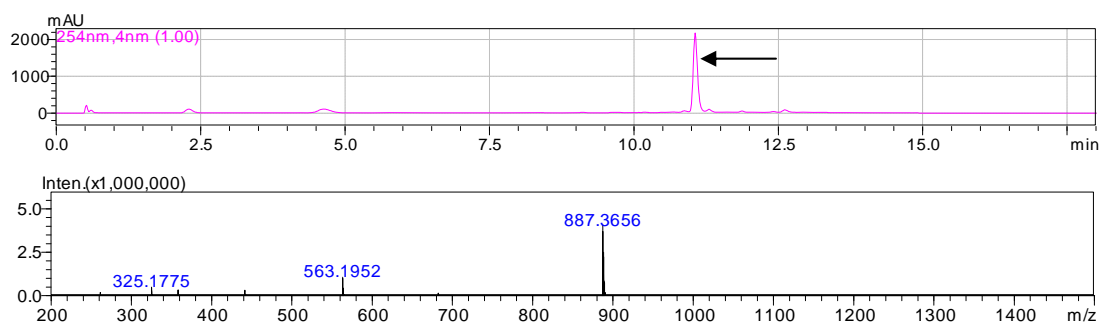

### P9

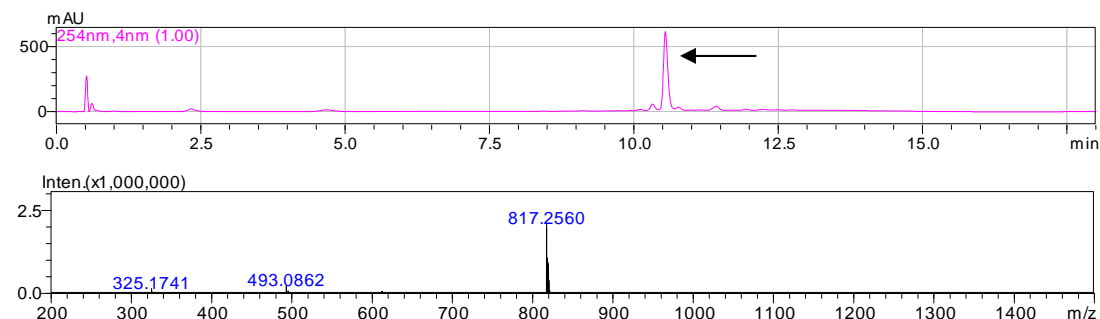

### P10

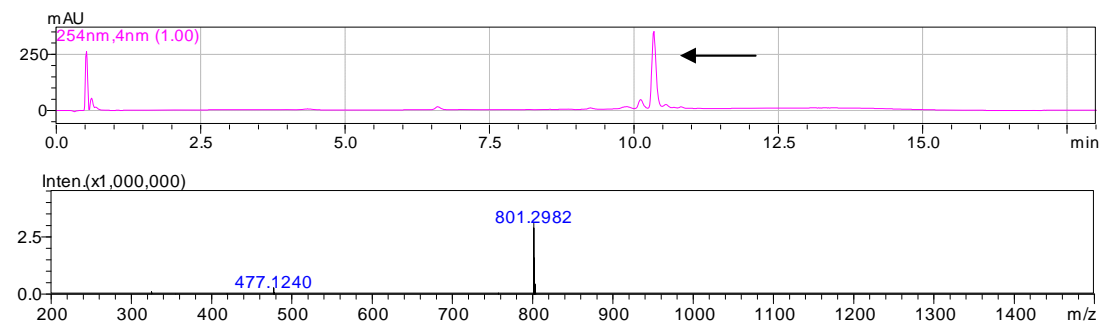

### P11

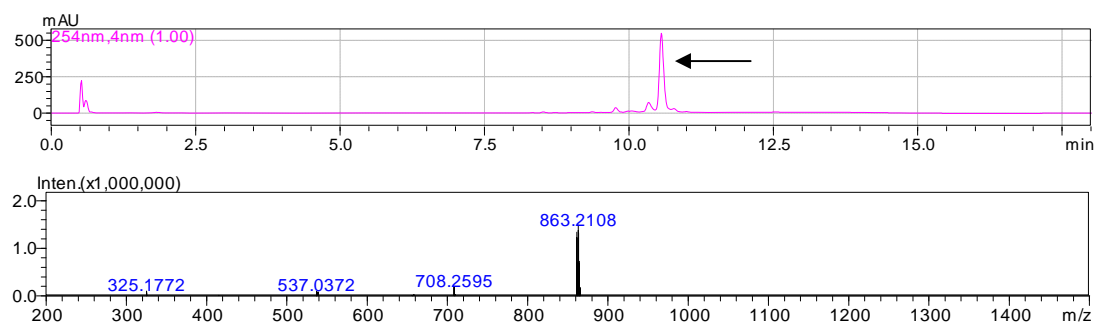

### P12

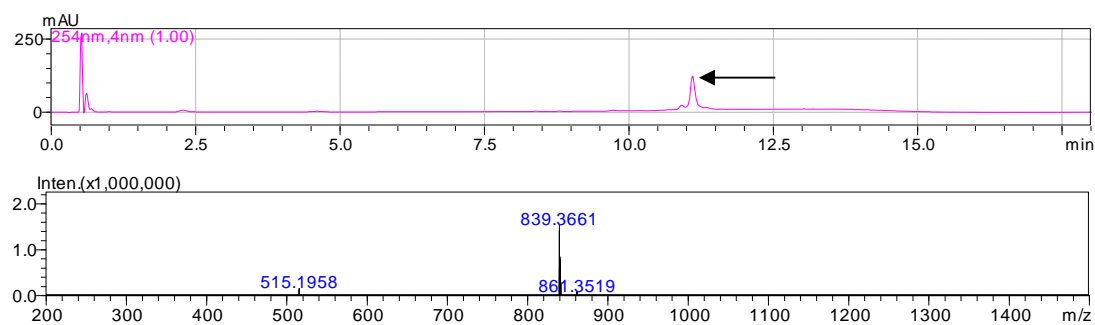

### P13

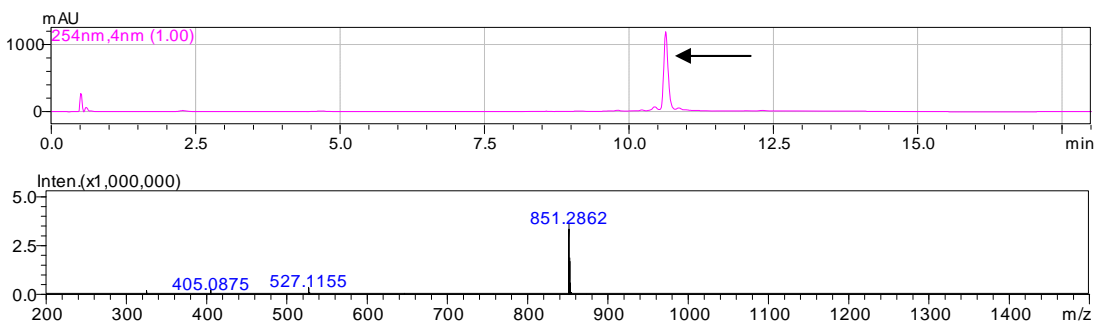

### P14

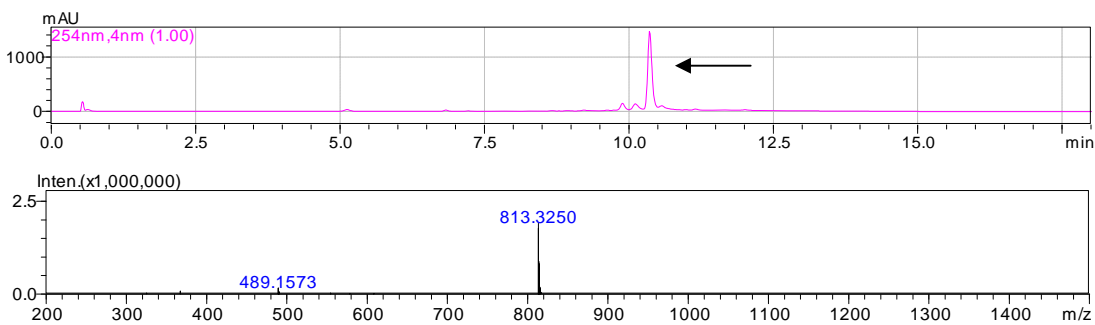

### P15

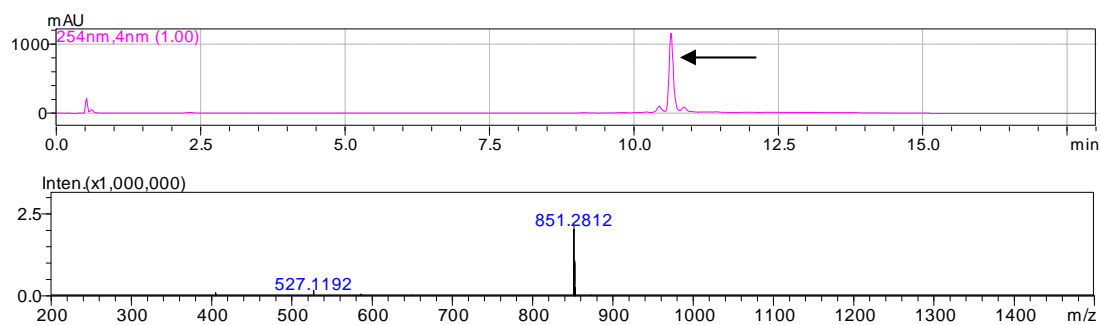

### P16

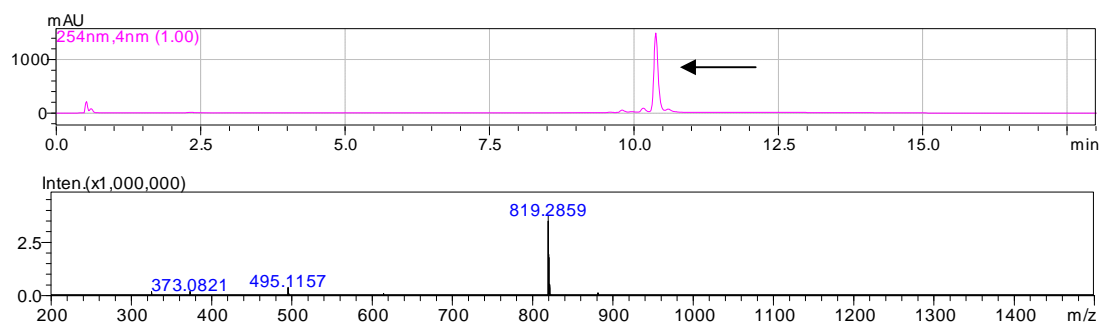

### P17

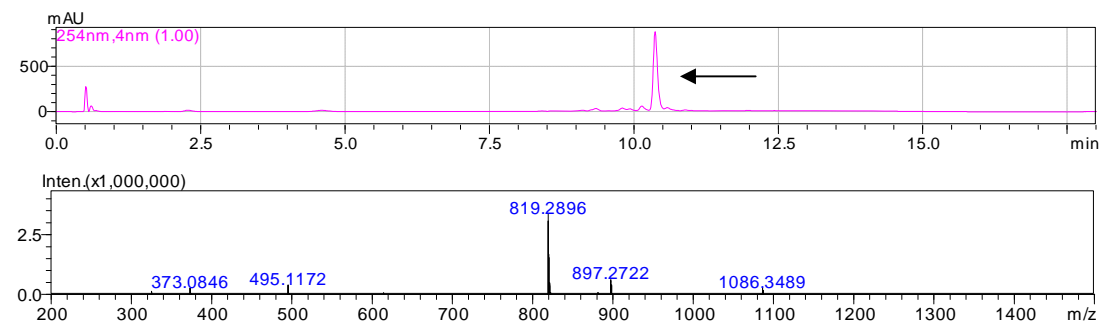

### P18

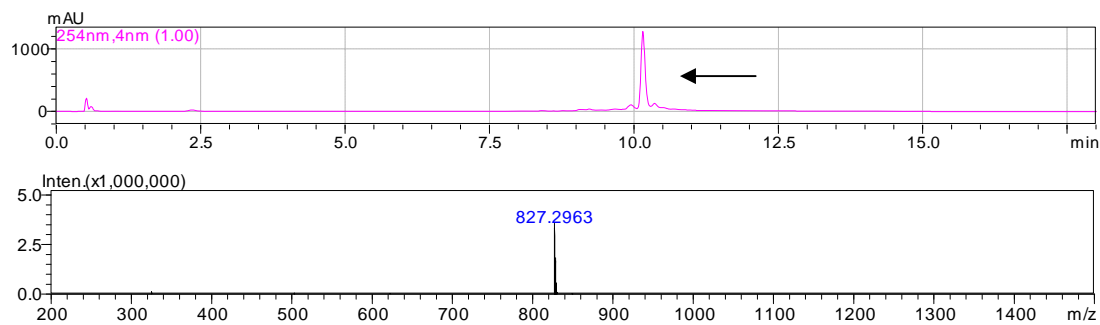

### P19

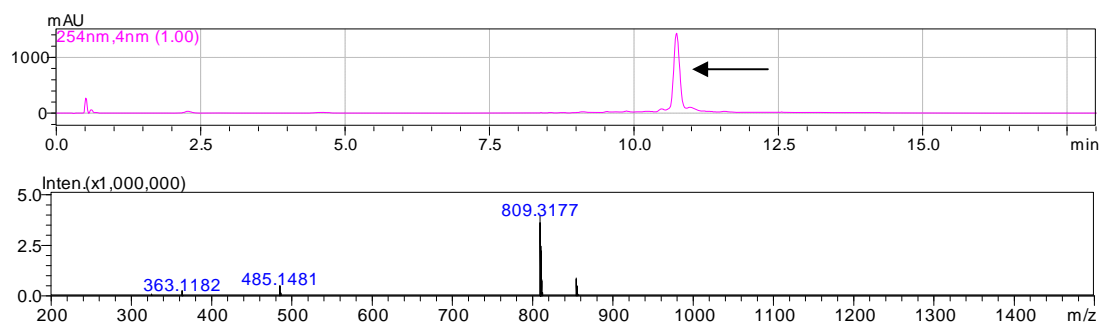

### P20

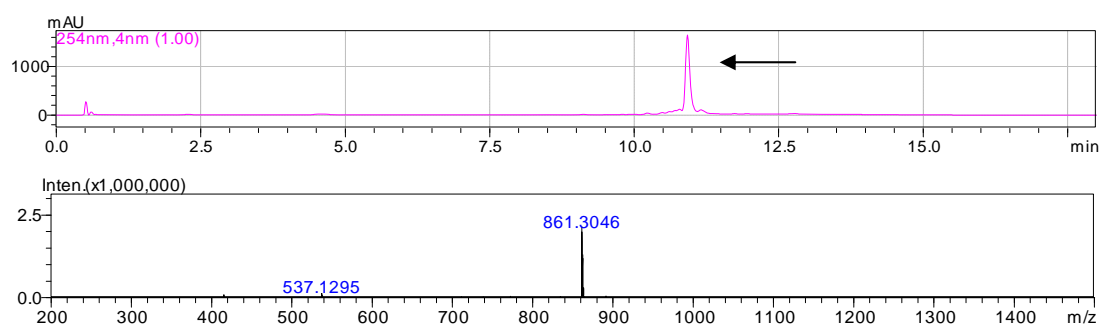

### P21

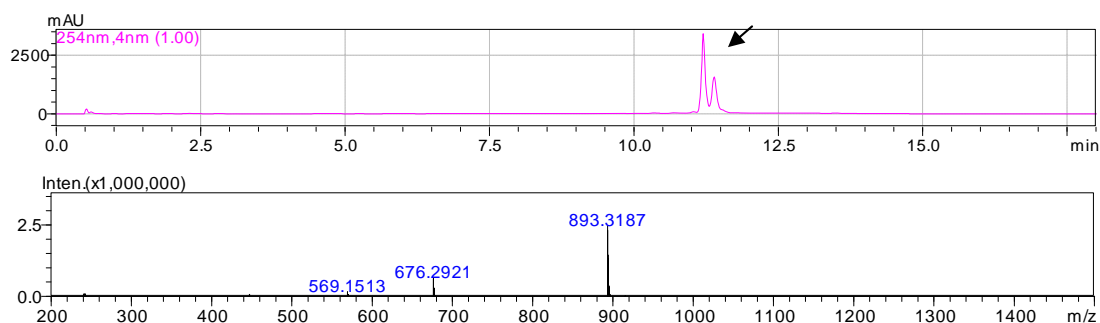

### P22

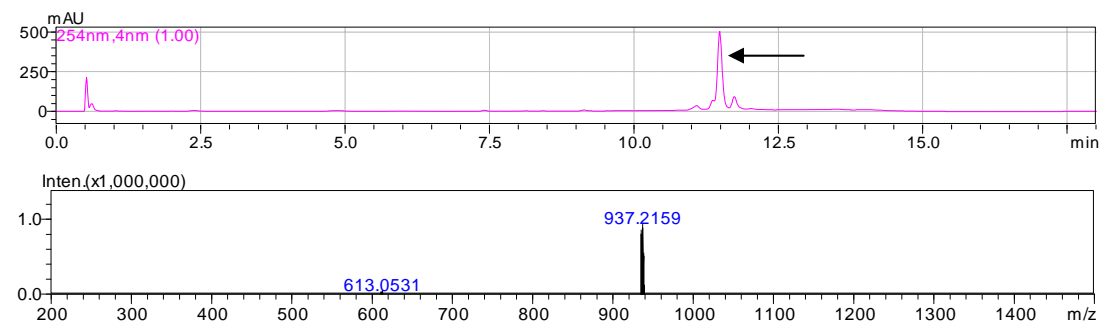



## P23

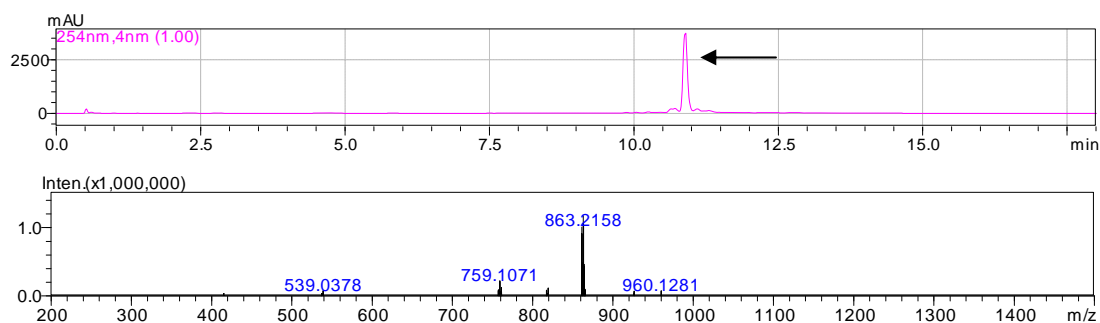

## P24

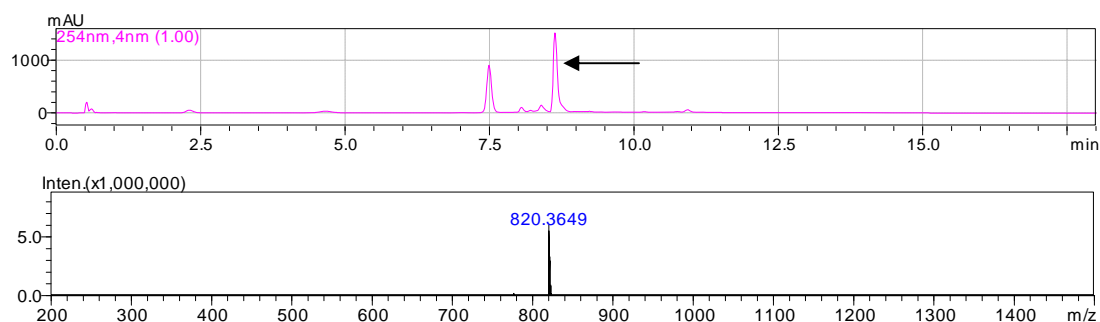

## P25

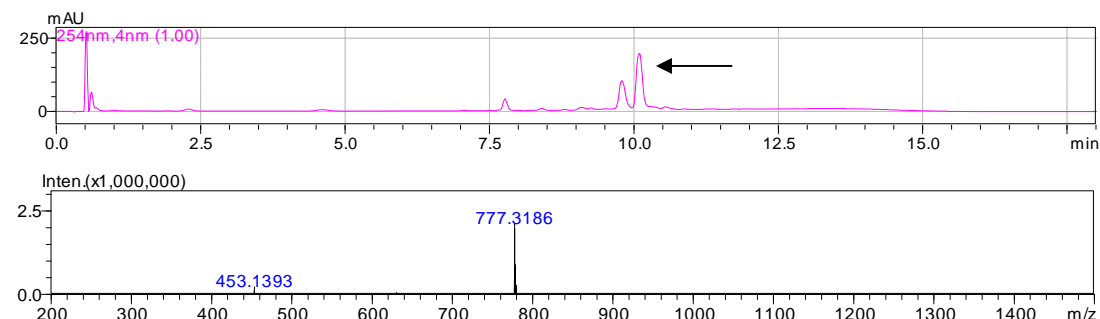

### 3.2.2 <sup>1</sup>H NMR/MS Data

#### P2

<sup>1</sup>H-NMR (500 MHz, DMSO-*d*<sub>6</sub>) δ 8.41 - 8.42 (m, 1H), 7.91 - 8.28 (m, 1H), 7.65 - 7.72 (m, 7H), 7.55 (t, *J* = 7.55 Hz, 2H), 7.41 (d, *J* = 7.55 Hz, 2H), 7.11 - 7.29 (m, 6H), 6.88 (m, 2H), 4.80 - 5.04 (m, 1H), 4.23 - 4.46 (m, 4H), 3.53 (m, 2H), 3.06 - 3.11 (m, 2H), 2.78 - 2.85 (m, 3H), 2.11 - 2.21 (m, 6H), 1.69 (m, 2H), 1.50 - 1.51 (m, 2H), 1.39 - 1.42 (m, 2H), 1.33 (m, 2H). IT-TOF: *m/z* [M+1]<sup>+</sup> calcd: 797.35, found: 797.31.

#### P4

<sup>1</sup>H-NMR (500 MHz, DMSO-*d*<sub>6</sub>) δ 8.41 (m, 1H), 7.82 - 8.20 (m, 1H), 7.65 - 7.72 (m, 7H), 7.55 (t, *J* = 7.62 Hz, 2H), 7.41 (d, *J* = 8.20 Hz, 2H), 7.07 - 7.24 (m, 5H), 6.88 (m, 3H), 4.75 - 4.90 (m, 1H), 4.22 - 4.36 (m, 4H), 3.03 (m, 2H), 2.76 (m, 1H), 2.50 (m, 2H), 2.15 (m, 4H), 1.67 (m, 2H), 1.41 - 1.52 (m, 8H), 1.23 (m, 2H). IT-TOF: *m/z* [M+1]<sup>+</sup> calcd: 825.38, found: 825.34.

#### P9

<sup>1</sup>H-NMR (500 MHz, DMSO-*d*<sub>6</sub>) δ 8.41 (m, 1H), 8.08 - 8.30 (m, 1H), 7.70 - 8.07 (m, 7H), 7.66 (m, 2H), 7.42 (m, 2H), 7.28 (m, 2H), 7.14 (m, 2H), 6.83 - 6.88 (m, 3H), 4.94 - 5.25 (m, 1H), 4.58 - 4.80 (m, 2H), 4.15 - 4.39 (m, 4H), 2.99 (m, 2H), 2.70 (m, 1H), 2.34 - 2.40 (m, 1H), 2.25 (m, 1H), 2.14 - 2.18 (m, 4H), 1.67 - 1.80 (m, 2H), 1.52 (m, 2H), 1.33 (m, 2H), 1.24 (m, 2H). IT-TOF: *m/z* [M+1]<sup>+</sup> calcd: 817.29, found: 817.26.

#### P10

<sup>1</sup>H-NMR (500 MHz, DMSO-*d*<sub>6</sub>) δ 8.42 (m, 1H), 8.02 - 8.2 (m, 1H), 7.65 - 7.72 (m, 7H), 7.55 (t, *J* = 7.62 Hz, 2H), 7.41 (d, *J* = 8.20 Hz, 2H), 7.28 (m, 1H), 7.15 (m, 1H), 6.98 (dt, *J*<sub>1</sub> = 34.9, *J*<sub>2</sub> = 8.77 Hz, 2H), 6.81 (m, 3H), 4.89 - 5.21 (m, 1H), 4.63 - 4.78 (m, 2H), 4.09 - 4.37 (m, 4H), 2.98 (m, 2H), 2.68 (m, 1H), 2.23 - 2.32 (m, 2H), 2.08 - 2.15 (m, 4H), 1.65 - 1.80 (m, 4H), 1.51 (m, 2H), 1.33 (m, 2H), 1.22 (m, 2H). IT-TOF: *m/z* [M+1]<sup>+</sup> calcd: 801.32, found: 801.30.

#### P11

<sup>1</sup>H-NMR (500 MHz, DMSO-*d*<sub>6</sub>) δ 8.42 (m, 1H), 8.02-8.28 (m, 1H), 7.66 - 7.72 (m, 7H), 7.55 (t, *J* = 7.65 Hz, 2H), 7.41 (m, 3H), 7.20 - 7.32 (m, 2H), 7.07 (m, 1H), 6.82 (m, 3H), 4.91 - 5.23 (m, 1H), 4.63 - 4.77 (m, 2H), 4.15 - 4.37 (m, 4H), 3.00 (m, 2H), 2.70 (m, 1H), 2.23 - 2.34 (m, 2H), 2.14 (m, 4H), 1.66 - 1.68 (m, 2H), 1.52 (m, 2H), 1.32 (m, 2H), 1.21 (m, 2H). IT-TOF: *m/z* [M+1]<sup>+</sup> calcd: 861.24, found: 863.21. (Br isotope)

#### P12

<sup>1</sup>H-NMR (500 MHz, DMSO-*d*<sub>6</sub>) δ 8.42 (m, 1H), 7.96 - 8.22 (m, 1H), 7.63 - 7.96 (m, 7H), 7.55 (t, *J* = 7.55 Hz, 2H), 7.41 (d, *J* = 8.20 Hz, 2H), 7.22 (m, 1H), 7.04 - 7.15 (m, 3H), 6.75 (m, 3H), 4.89 - 5.17 (m, 1H), 4.67 (m, 1H), 4.03 - 4.36 (m, 4H), 2.97 (m, 2H), 2.68 (s, 1H), 2.24 - 2.40 (m, 2H), 2.08 - 2.14 (m, 4H), 1.67 - 1.76 (m, 2H), 1.51 (m, 2H), 1.34 (m, 2H), 1.14 - 1.19 (m, 11H). IT-TOF: *m/z* [M+1]<sup>+</sup> calcd: 839.39, found: 839.37.

#### P13

<sup>1</sup>H-NMR (500 MHz, DMSO-*d*<sub>6</sub>) δ 8.41 (t, *J* = 5.80 Hz, 1H), 8.11 - 8.39 (m, 1H), 7.67 - 7.71 (m, 7H), 7.54 - 7.58 (m, 4H), 7.40 - 7.47 (m, 4H), 7.32 (d, *J* = 7.55 Hz, 1H), 6.84 (m, 2H), 4.96 - 5.30 (m, 1H), 4.77 - 4.91 (m, 2H), 4.16 - 3.37 (m, 4H), 2.93 - 2.99 (m, 2H), 2.66 - 2.69 (m, 1H), 2.23 - 2.26 (m, 1H), 2.15 (m, 1H), 2.13 -

2.14 (m, 4H), 1.68 - 1.79 (m, 2H), 1.50 (m, 2H), 1.32 (m, 2H), 1.22 (m, 2H). IT-TOF:  $m/z$   $[M+1]^+$  calcd: 851.32, found: 851.27.

#### P14

$^1\text{H-NMR}$  (500 MHz,  $\text{DMSO-}d_6$ )  $\delta$  8.41 (m, 1H), 8.03 - 8.26 (m, 1H), 7.63 - 7.71 (m, 7H), 7.55 (m, 2H), 7.41 (d,  $J = 8.20$  Hz, 2H), 6.61 - 7.15 (m, 7H), 4.91 - 5.22 (m, 1H), 4.61 - 4.78 (m, 2H), 4.13 - 4.37 (m, 4H), 3.57 - 3.65 (m, 3H), 2.99 (m, 2H), 2.67 (m, 1H), 2.24 - 2.35 (m, 2H), 2.11 - 2.15 (m, 4H), 1.65 - 1.69 (m, 2H), 1.51 (m, 2H), 1.35 (m, 2H), 1.23 (m, 2H). IT-TOF:  $m/z$   $[M+1]^+$  calcd: 813.34, found: 813.32.

#### P15

$^1\text{H-NMR}$  (500 MHz,  $\text{DMSO-}d_6$ )  $\delta$  8.40 (m, 1H), 8.15 - 8.34 (m, 1H), 7.65 - 7.72 (m, 7H), 7.34 - 7.57 (m, 8H), 6.81 (m, 3H), 4.96 - 5.31 (m, 1H), 4.50 - 4.91 (m, 2H), 4.21 - 4.50 (m, 4H), 2.94 - 2.99 (m, 2H), 2.70 (m, 1H), 2.34 (m, 1H), 2.23 (m, 1H), 2.13 (m, 4H), 1.76 (m, 1H), 1.67 (m, 1H), 1.50 (m, 2H), 1.32 (m, 2H), 1.2 (m, 2H). IT-TOF:  $m/z$   $[M+1]^+$  calcd: 851.32, found: 851.28.

#### P16

$^1\text{H-NMR}$  (500 MHz,  $\text{DMSO-}d_6$ )  $\delta$  8.42 (m, 1H), 8.08 - 8.31 (m, 1H), 7.65 - 7.72 (m, 7H), 7.56 (t,  $J = 7.60$  Hz, 2H), 7.41 (d,  $J = 8.20$  Hz, 2H), 7.29 (m, 1H), 7.11 (m, 2H), 6.98 (m, 1H), 6.83 (m, 2H), 4.92 - 5.24 (m, 1H), 4.65 - 4.74 (m, 2H), 4.17 - 4.37 (m, 4H), 2.99 (m, 2H), 2.67 (m, 1H), 2.36 (m, 1H), 2.24 (m, 1H), 2.14 (m, 4H), 1.65 - 1.78 (m, 2H), 1.51 (m, 2H), 1.34 (m, 2H), 1.24 (m, 2H). IT-TOF:  $m/z$   $[M+1]^+$  calcd: 819.31, found: 819.29.

#### P18

$^1\text{H-NMR}$  (500 MHz,  $\text{DMSO-}d_6$ )  $\delta$  8.43 (m, 1H), 7.97 - 8.23 (m, 1H), 7.65 - 7.72 (m, 7H), 7.56 (t,  $J = 7.60$  Hz, 2H), 7.41 (d,  $J = 8.20$  Hz, 2H), 6.61 - 6.82 (m, 6H), 5.77 - 5.92 (m, 2H), 4.87 - 5.14 (m, 1H), 5.53 - 4.67 (m, 2H), 4.06 - 4.37 (m, 4H), 2.30 (m, 2H), 2.64 (m, 1H), 2.23 - 2.37 (m, 2H), 2.14 (m, 4H), 1.66 - 1.68 (m, 2H), 1.51 (m, 2H), 1.34 (m, 2H), 1.22 (m, 2H). IT-TOF:  $m/z$   $[M+1]^+$  calcd: 827.32, found: 827.30.

#### P19

$^1\text{H-NMR}$  (500 MHz,  $\text{DMSO-}d_6$ )  $\delta$  8.41 (m, 1H), 8.02 - 8.15 (m, 1H), 7.61 - 7.72 (m, 7H), 7.55 (t,  $J = 7.55$  Hz, 2H), 7.41 (m, 3H), 7.12 - 7.22 (m, 2H), 6.93 - 7.03 (m, 1H), 6.73 (m, 1H), 5.21 - 5.26 (m, 1H), 3.84 - 4.36 (m, 4H), 2.81 - 2.88 (m, 4H), 2.68 - 2.71 (m, 2H), 1.98 - 2.18 (m, 8H), 1.52 - 1.63 (m, 4H), 1.40 (m, 2H), 1.25 (m, 2H). IT-TOF:  $m/z$   $[M+1]^+$  calcd: 809.35, found: 809.32.

#### P20

$^1\text{H-NMR}$  (500 MHz,  $\text{DMSO-}d_6$ )  $\delta$  8.41 (m, 1H), 8.10 (m, 1H), 7.65 - 7.72 (m, 7H), 7.55 (t,  $J = 7.55$  Hz, 2H), 7.32 - 7.42 (m, 6H), 6.89 - 7.12 (m, 8H), 5.31 (m, 2H), 4.00 - 4.36 (m, 4H), 3.02 (m, 2H), 2.68 (s, 1H), 2.07 - 2.17 (m, 6H), 1.61 (m, 2H),

1.52 (m, 2H), 1.38 (m, 2H), 1.23 (m, 2H). IT-TOF:  $m/z$   $[M+1]^+$  calcd: 861.34, found: 861.30.

## P23

$^1\text{H-NMR}$  (500 MHz,  $\text{DMSO-}d_6$ )  $\delta$  8.40 (m, 1H), 8.15 (m, 1H), 7.65 - 7.72 (m, 7H), 7.55 (m, 3H), 7.40 (m, 3H), 7.19 (s, 1H), 6.87 - 6.94 (m, 3H), 5.30 (m, 1H), 3.94 - 4.37 (m, 4H), 3.07(m, 2H), 2.68 (s, 1H), 2.05 - 2.23 (m, 9H), 1.53 - 1.63 (m, 4H), 1.41 (m, 2H), 1.27 (m, 2H). IT-TOF:  $m/z$   $[M+1]^+$  calcd: 861.24, found: 863.22. (Br isotope)

## 4. Procedures and results of inhibition assay<sup>[3]</sup>

The inhibition of MCR products to against protein tyrosine phosphatases (PTPs) was assessed by measuring the rate of hydrolysis of the fluorogenic substrate, 6,8-difluoromethylumbellifery phosphate (DIFMUP, Invitrogen, USA) in 25  $\mu\text{L}$  reaction volumes in black polypropylene flat-bottom 384-well microtiter plates(Greiner, Germany), using PTP1B and MptpB as model proteins. For  $\text{IC}_{50}$  studies, dose-dependent reactions were set up by varying the concentration of each inhibitor while maintaining a fixed enzyme and substrate concentration. Briefly, a two-fold dilution series of an inhibitor, from approximately 400  $\mu\text{M}$  to 3.125  $\mu\text{M}$  (final concentrations) was prepared. The reaction conditions are shown below:

PTP1B (2  $\mu\text{g/mL}$ ) = 10  $\mu\text{L}$

DiFMUP (10  $\mu\text{M}$ ) = 10  $\mu\text{L}$

Inhibitor (Varied) = 5  $\mu\text{L}$  (in 40% DMSO)

Assay buffer (PTP1B) = 25 mM HEPES, 150 mM NaCl, 0.1 mg/mL BSA  $p\text{H}=7.5$

Assay buffer (MptpB) = 25 mM HEPES, 2.5 mM EDTA, 50 mM NaCl, 0.02%

Triton-100, 2 mM DTT,  $p\text{H} = 7.4$

Negative controls were performed in the absence of enzyme and positive controls were carried out in the presence of enzyme with DMSO (i.e. without inhibitor). The reactions were allowed to incubate at room temperature for 30 min before being initiated by addition of DIFMUP. The enzymatic reactions were immediately monitored with a Synergy<sup>TM</sup> 4 Multi-Mode Microplate Reader (BioTek, USA), at  $\lambda_{\text{ex}}=355$  nm and  $\lambda_{\text{em}}=460$  nm for a period of 15 min. Each  $\text{IC}_{50}$  plot was generated by averaging duplicates from two independent assays (Figure S1).

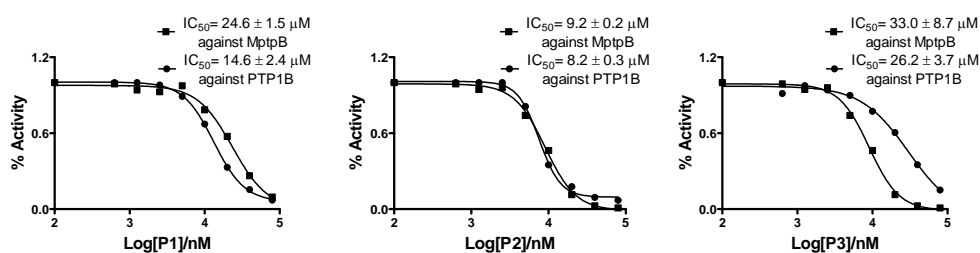

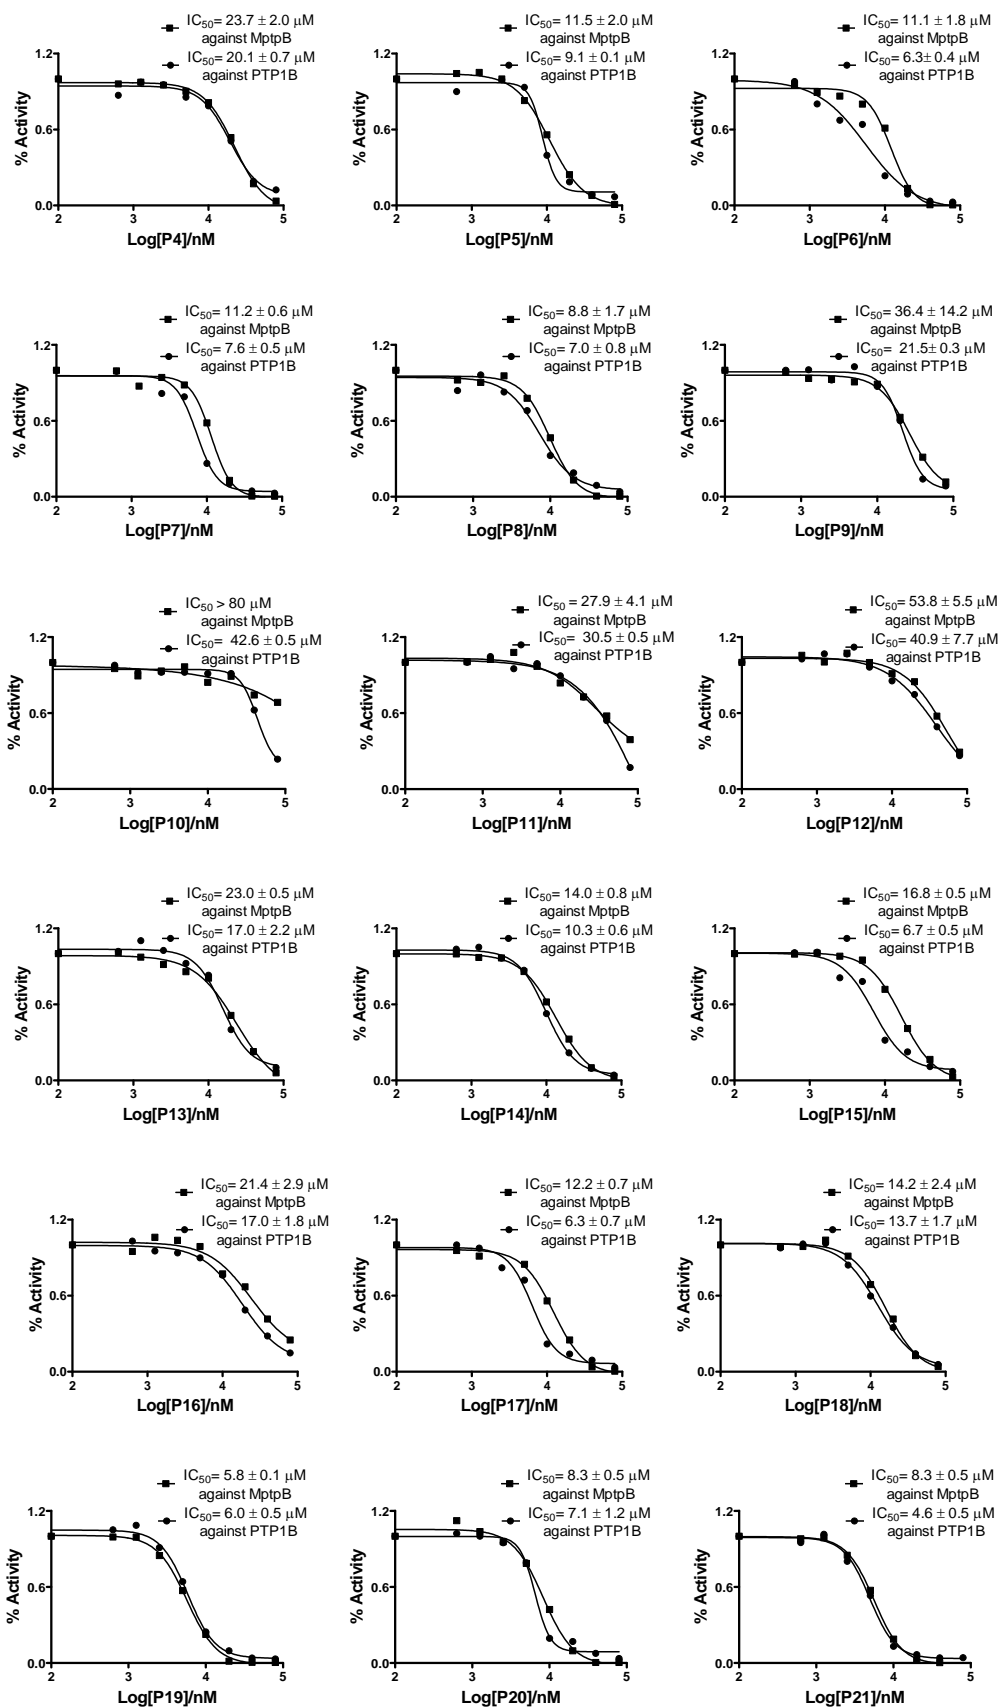

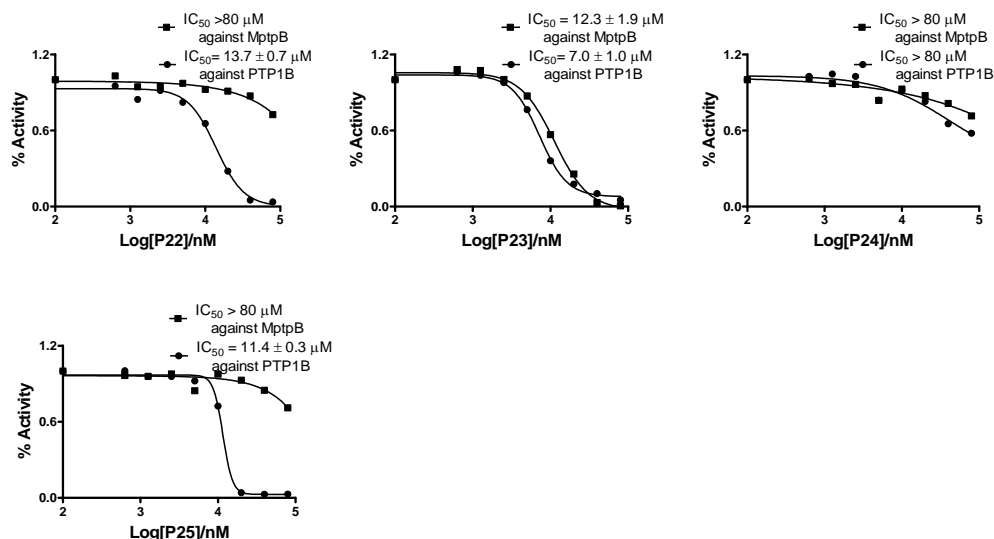

Figure S1. IC<sub>50</sub> graphs of all 25 A/BPs against PTP1B and MptpB

Table S2 Summary of IC<sub>50</sub> values of 25 A/BPs against PTP1B/MptpB

| Probe ID   | IC <sub>50</sub> (μM) |             | Probe ID   | IC <sub>50</sub> (μM) |            |
|------------|-----------------------|-------------|------------|-----------------------|------------|
|            | PTP1B                 | MptpB       |            | PTP1B                 | MptpB      |
| <b>P1</b>  | 14.6 ± 2.4            | 24.6 ± 1.5  | <b>P14</b> | 10.3 ± 0.6            | 14.0 ± 0.8 |
| <b>P2</b>  | 8.2 ± 0.3             | 9.2 ± 0.2   | <b>P15</b> | 6.7 ± 0.5             | 16.8 ± 0.5 |
| <b>P3</b>  | 26.2 ± 3.7            | 33.0 ± 8.7  | <b>P16</b> | 17.0 ± 1.8            | 21.4 ± 2.9 |
| <b>P4</b>  | 20.1 ± 0.7            | 23.7 ± 2.0  | <b>P17</b> | 6.3 ± 0.7             | 12.2 ± 0.7 |
| <b>P5</b>  | 9.1 ± 0.1             | 11.5 ± 2.0  | <b>P18</b> | 13.7 ± 1.7            | 14.2 ± 2.4 |
| <b>P6</b>  | 6.3 ± 0.4             | 11.1 ± 1.8  | <b>P19</b> | 6.0 ± 0.5             | 5.8 ± 0.1  |
| <b>P7</b>  | 7.6 ± 0.5             | 11.2 ± 0.6  | <b>P20</b> | 7.1 ± 1.2             | 8.3 ± 0.5  |
| <b>P8</b>  | 7.0 ± 0.8             | 8.8 ± 1.7   | <b>P21</b> | 4.6 ± 0.5             | 5.3 ± 0.5  |
| <b>P9</b>  | 21.5 ± 0.3            | 36.4 ± 14.2 | <b>P22</b> | 13.7 ± 0.7            | > 80       |
| <b>P10</b> | 42.6 ± 0.5            | > 80        | <b>P23</b> | 7.0 ± 1.0             | 12.3 ± 1.9 |
| <b>P11</b> | 30.5 ± 0.5            | 27.9 ± 4.1  | <b>P24</b> | > 80                  | > 80       |
| <b>P12</b> | 40.9 ± 7.7            | 53.8 ± 5.5  | <b>P25</b> | 11.4 ± 0.3            | > 80       |
| <b>P13</b> | 17.0 ± 2.2            | 23.0 ± 0.5  |            |                       |            |

## 5. Procedures and results of labeling experiments

### 5.1 General Information

PTP1B and MptpB containing His<sub>6</sub>-tag were expressed in *E.coli* strain BL21-DE3, as previously described,<sup>[1]</sup> and purified from the lysates on Nickel-nitrilotriacetic acid (Ni-NTA) metal-affinity chromatography matrices (Qiagen) according to the manufacturer's instructions. The purified proteins were then

dialyzed against dialysis buffer and stored in 30% glycerol at -20 °C before use. (Dialysis buffer: PTP1B: 10 mM Tris·HCl, 25 mM NaCl, pH = 7.5; MptpB: 50 mM Tris·HCl, 100 mM NaCl, pH = 7.4). Stock solutions of enzymes were prepared in final concentrations of 2-5 mg/mL (in dialysis buffer). Stock solutions of the probes were prepared in DMSO and stored at before use. UV photolysis experiments were carried out using a B100A UV lamp (UVP, USA). Fluorescence imaging was performed using a Typhoon 9410 fluorescence gel scanner at  $\lambda = 533$  nm and analyzed with the ImageQuant Software.

## 5.2 General Procedure for enzyme labeling

The enzyme stock solutions were diluted to 1 mg/mL. Generally 1  $\mu$ L enzyme solution was added into 14  $\mu$ L dialysis buffer solution with 1  $\mu$ L probe and shaken at room temperature in the dark for 30 min. The mixture was next irradiated under the long-rang wavelength UV channel for 20 min on the ice. Subsequently, 1  $\mu$ L of rhodamine-N<sub>3</sub> and the click reagents (total 3  $\mu$ L; see reference 4) were added into the solution (final solution contained CuSO<sub>4</sub> (500  $\mu$ M), TBTA liagnd (100  $\mu$ M) and the reducing reagent (PTP1B: sodium ascorbate 250  $\mu$ M; MptpB: DTT 500  $\mu$ M)). The whole solution (total 20  $\mu$ L) was shaken at room temperature for 2 hours. The reaction was then quenched by addition of 4  $\mu$ L of 6  $\times$  SDS loading dye followed by boiling at 95 °C for 10 min. The samples were analyzed on a 10% denaturing SDS-PAGE gel. The fluorescence was detected with fluorescence gel scanner.

To determine the concentration-dependent labeling with varied amounts of the enzyme, 1  $\mu$ L of MptpB (2000 ng, 1000 ng, 500 ng, 250 ng) was added into different reaction vessels, each containing 5  $\mu$ M of the probe **P15**. The samples were then treated as mentioned above. To determine the concentration-dependent labeling with varied amounts of the probe **P15**, 1  $\mu$ g of MptpB was incubated with probe **P15** (20, 10, 5, 2.5, 1.25, 0.6, 0.3, 0  $\mu$ M). The reaction was incubated for 30 min and treated as mentioned above.

For time-dependent experiments, identical reaction mixtures containing 1  $\mu$ L of MptpB and 5  $\mu$ M of the probe **P15** were similarly set up. The reactions were incubated at room temperature in the dark for 30 min. The mixtures were then irradiated for varied lengths of time (10, 15, 20, 30, 60 min) with long-wavelength UV light. Then the mixture was analyzed as mentioned above.

For labeling experiments with different click reagents and click reaction time, the reactions were prepared as mentioned above by using the probe **P15**. Varied amounts of CuSO<sub>4</sub> (100, 200, 500  $\mu$ M) were used. Then the mixture was treated as described above. Probes **P12** and **P17** were used to test the optimized amount of the ligand (TBTA, tris[(1-benzyl-1H-1,2,3-triazol-4-yl)methyl]amine) in the labeling of MptpB. Probe **P15** was used to test the difference in the reducing agent (i.e. DTT vs sodium ascorbate) in the labeling reaction. Different amounts of sodium ascorbate (250, 500, 1000  $\mu$ M) and DTT (125, 250, 500, 1000  $\mu$ M) were used. All other conditions were similar as above mentioned. To optimize the click reaction time, after addition of the click reagent as mentioned above, the reaction was further incubated for 0.5, 1, 1.5, 2, and 3 hours.

For heat-denaturing experiments, MMptpB (in Tris buffer) was heated at 95 °C for 10 min and allowed to cool to room temperature. Each reaction was set up using 1000 ng denatured and normal MptpB. Different probes (**P13**, **P14**, **P19** and **P20**) were used. Other procedures were the same as above described.

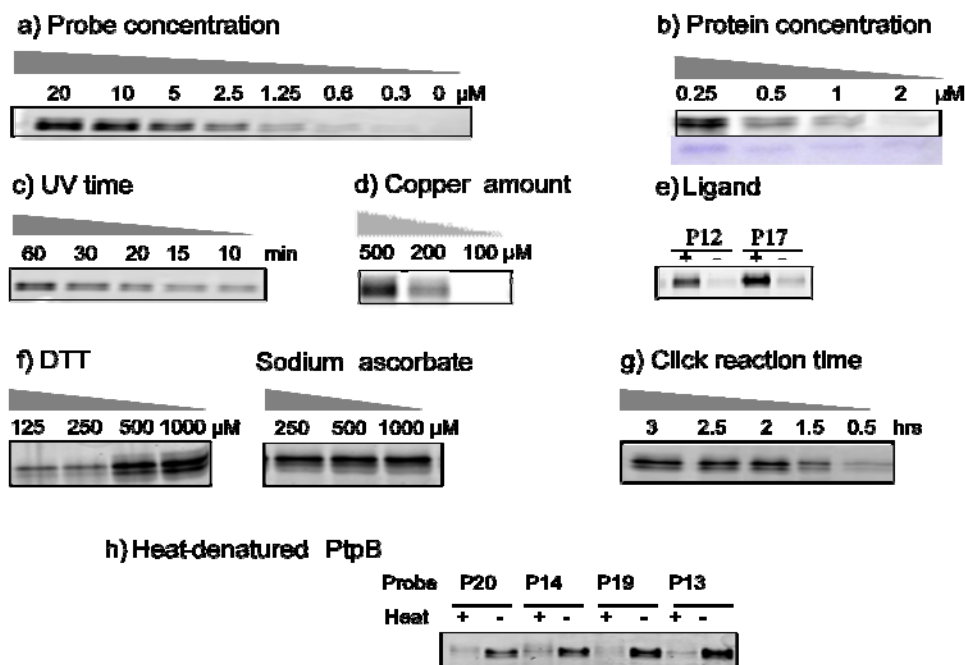

**Figure S2** a) Effect of probe **P15** concentration on labeling intensity: MptpB was incubated with decreasing concentrations of **P15** (final concentration: 20, 10, 5, 2.5, 1.25, 0.6, 0.3, and 0 μM, respectively); b) Effect of protein concentrations on labeling intensity: different MptpB concentrations (final concentration: 2, 1, 0.5, and 0.25 μg, respectively); c) Effect of UV irradiation time on labeling intensity: MptpB was exposed to long-wavelength UV light for varying amounts of time (60, 30, 20, 15, 10 min, respectively); d) Effect of copper amount on labeling intensity: click reaction was carried out with increasing amounts of CuSO<sub>4</sub> (final concentration: 100, 200, and 500 μM); e) Effect of TBTA ligand on labeling intensity: two different probes were incubated with or without the TBTA ligand (final concentration: 125 μM); f) Effect of reducing reagents on labeling intensity: MptpB was incubated with different concentrations of DTT (final concentration: 125, 250, 500, and 1000 μM, respectively); PTP1B was incubated with different concentrations of sodium ascorbate (final concentration: 250, 500, and 1000 μM); g) Effect of click time on the labeling intensity: click reactions were carried with increasing time (3, 2.5, 2, 1.5 and 0.5 hours, respectively); h) Different probes (**P13**, **P14**, **P19**, and **P20**; final probe concentration: 5 μM) against heat-denatured and native MptpB.

### 5.3 Affinity-based profiling of MptpB/PTP1B by using 25 A/BPs.

The following optimized labeling conditions were used. The labeling procedure was the same as mentioned above. Results are shown in Figure 3 in the maintext.

PTP1B: protein 1 μg; probe 5 μM; dye 40 μM; Copper sulfate 500 μM; ligand 100 μM; sodium ascorbate 500 μM; UV time 20 min; click time 2 hours.



MptpB: protein 1  $\mu\text{g}$ ; probe 5  $\mu\text{M}$ ; dye 40  $\mu\text{M}$ ; Copper sulfate 500  $\mu\text{M}$ ; ligand 100  $\mu\text{M}$ ; DTT 500  $\mu\text{M}$ ; UV time 20 min; click time 2 hours.

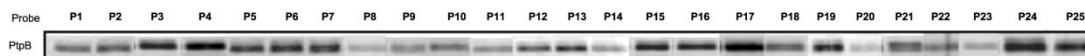

**Figure S3** Gel profiling of MptpB generated by labeling against 25 probes

#### **5.4 *In vitro* labeling mammalian proteomes and pull-down/LC-MS/MS analysis.**

*In vitro* proteome labeling experiments were carried out with MCF-7 cell lysates, as previously described.<sup>[4]</sup> **P23** (20  $\mu\text{M}$ ) was incubated with MCF-7 cell lysates (10 mg/10 mL in a chilled buffer of 50 mM Tris-HCl, 150 mM NaCl, pH 8.0, 1.0% NP-40, 100  $\mu\text{M}$  PMSF) for 20 min at room temperature. Then the samples were irradiated for 45 min under UV light. Subsequently, a small amount of the irradiated sample was treated with rhodamine- $\text{N}_3$  (100  $\mu\text{M}$ ) and click reagent (1 mM  $\text{CuSO}_4$ , 1 mM TCEP, 100  $\mu\text{M}$  TBTA) for 3 hours. Following acetone precipitation, washing (2x with methanol), resolubilization (in 1  $\times$  SDS loading buffer) and heating (10 min at 95  $^\circ\text{C}$ ), the sample was separated by SDS-PAGE (10% gel) and visualized by in-gel fluorescence scanning on a typhoon 9410 variable mode imager scanner. The fluorescent gel was shown in Figure 4a in maintext. The remaining labeled lysates (prior to click chemistry) were used for large-scale pull-down/LC-MS analysis. Briefly, the sample was treated with biotin- $\text{N}_3$  (100  $\mu\text{M}$ ) and click reagent (1 mM  $\text{CuSO}_4$ , 1 mM TCEP, 100  $\mu\text{M}$  TBTA) for 3 hours.<sup>[4]</sup> Subsequently, it was acetone-precipitated, washed (2x methanol) and resolubilized in PBS (containing 0.1% SDS) with sonication. The sample was then incubated with avidin-agarose beads (Thermo Scientific) for 4 hours at room temperature. After centrifugation, the supernatant was removed and the beads were washed with washing buffers (3x with 1 M NaCl, 20 mM Tris-HCl, 5 mM EDTA, 0.1% NP-40, pH = 7.3; 6x with 2 mM Tris-HCl, 0.5 mM EDTA, 0.1% NP-40, pH = 7.3; 6x with 4 M urea, 10 mM Tris-HCl, 1 mM EDTA, 0.1% NP-40, pH = 7.3; 2x with 2 mM Tris-HCl, 0.5 mM EDTA, pH = 7.3). The beads were then boiled in 1  $\times$  SDS loading buffer for 10 min. Samples were separated by SDS-PAGE gels and stained by colloidal blue solution. Gel lanes corresponding to both DMSO- and probe-treated samples were then cut into small slices, respectively. Next, trypsin digestion (In-Gel Trypsin Digestion Kit, Pierce Co., USA) was performed for the whole pull-down proteins. Digested peptides were then extracted from the gel with 50% acetonitrile and 1% formic acid in  $\text{H}_2\text{O}$ . Two samples was then dried *in vacuo* and stored at -20  $^\circ\text{C}$  for further LCMS analysis. Briefly, samples were analyzed as previously described.<sup>[4]</sup> The samples were resuspended in 0.1% formic acid in  $\text{H}_2\text{O}$ . The peptides were separated and analyzed on a Shimadzu UFLC system (Shimadzu, Kyoto, Japan) coupled to an LTQ-FT Ultra (Thermo Electron, Germany). Peptides were then analyzed on LTQ-FT with an ADVANCE<sup>TM</sup> CaptiveSpray<sup>TM</sup> Source (Michrom BioResources, USA) and the raw data were analyzed using an in-house Mascot Server (version 2.2.07, Matrix Science,

UK) with MS tolerance of 10 ppm and MS/MS tolerance of 0.8 Da. Two missed cleavage sites of trypsin were allowed. Carbamidomethylation (C) was set as a fixed modification. And oxidation (M) was set as variable modifications. After data analysis, a large number of proteins were identified from each LCMS experiments, many of which are non-specific binders and need to be removed. For those proteins with cores of < 50, they were automatically removed from the list. For those proteins that appeared in the negative run (pull-down/LCMS experiments with DMSO only), they also were excluded from the list as well. Highly abundant proteins that commonly appeared in irrelevant pull-down experiments were further removed.<sup>[4]</sup> The final list was shown in ESI\_2, with selected hits shown in Figure 4 in the maintext.

### 5.5 Target validation by pull-down/western blotting analysis

Pull-down samples were similarly prepared as described above. After SDS-PAGE gel separation, proteins were transferred to a PVDF membrane and subsequently blocked with 5% non-fat milk at room temperature for 1 hour. The membrane were further incubated for 1 hour at room temperature with anti-Biotin (Cell Signaling technology) and washed with TBST three times, then developed using Western blotting kit (Amersham ECL™ Advance).<sup>[4]</sup> For target validation, the membranes (prepared as before, prior to incubation with primary antibody) were incubated for 1 hour at room temperature with the respective antibodies (anti-PTP1B (Abcam, ab52650)<sup>[5]</sup>, anti-prohibitin (Santa Cruz, sc-18198), and anti-Cathepsin D (Santa Cruz, sc-70513)). After washing, proper secondary antibody was applied for 1 hour at room temperature. The blot was developed as before. Results are shown in Figure 4 in the maintext.

## 6. References

1. (1) R. Srinivasan, L. P. Tan, H. Wu, S. Q. Yao, *Org. Lett.*, 2008, **10**, 2295-2298; (b) L. P. Tan, H. Wu, P.-Y. Yang, K. A. Kalesh, X. Zhang, M. Hu, R. Srinivasan, S. Q. Yao, *Org. Lett.*, **2009**, *11*, 5102-5105.
2. M. B. Francis, T. Nguyen, *Org. Lett.*, 2003, **5**, 3245-3248.
3. R. Srinivasan, M. Uttamchandani, S. Q. Yao, *Org. Lett.*, 2006, **8**, 713-716.
4. P. -Y. Yang, K. Liu, M. H. Ngai, M. J. Lear, M. Wenk, S. Q. Yao, *J. Am. Chem. Soc.*, 2010, **132**, 656-666.
5. K. A. Kalesh, L. P. Tan, K. Liu, L. Gao, J. Wang, S. Q. Yao, *Chem. Comm.*, 2010, **46**, 1118-1120.

## 7. $^1\text{H}$ and $^{13}\text{C}$ NMR spectra

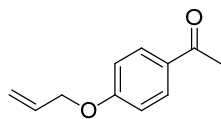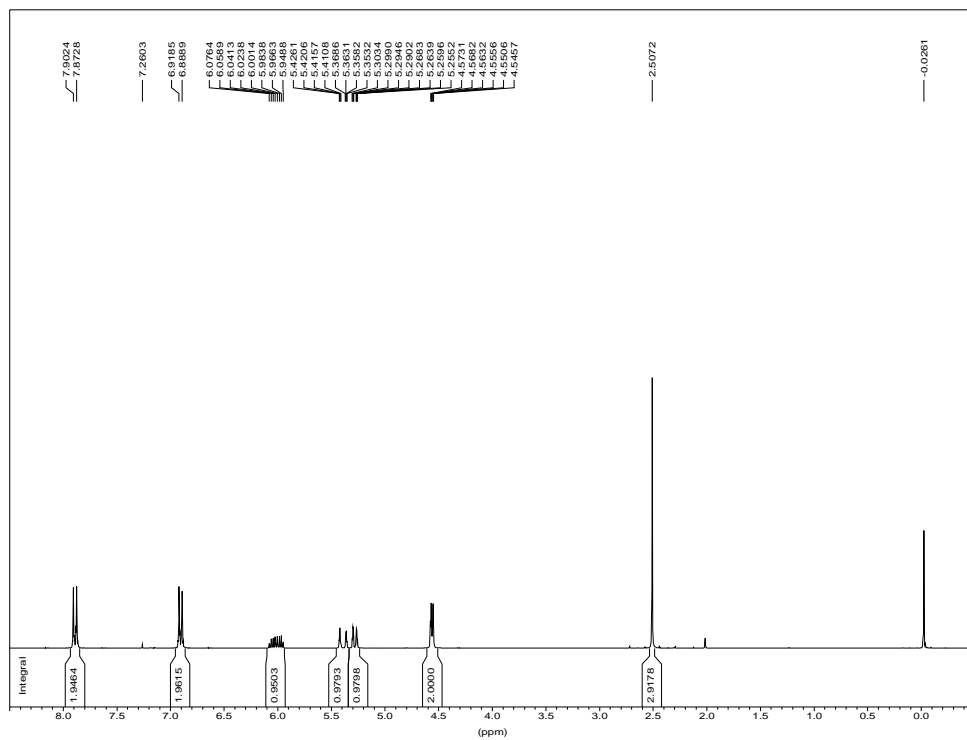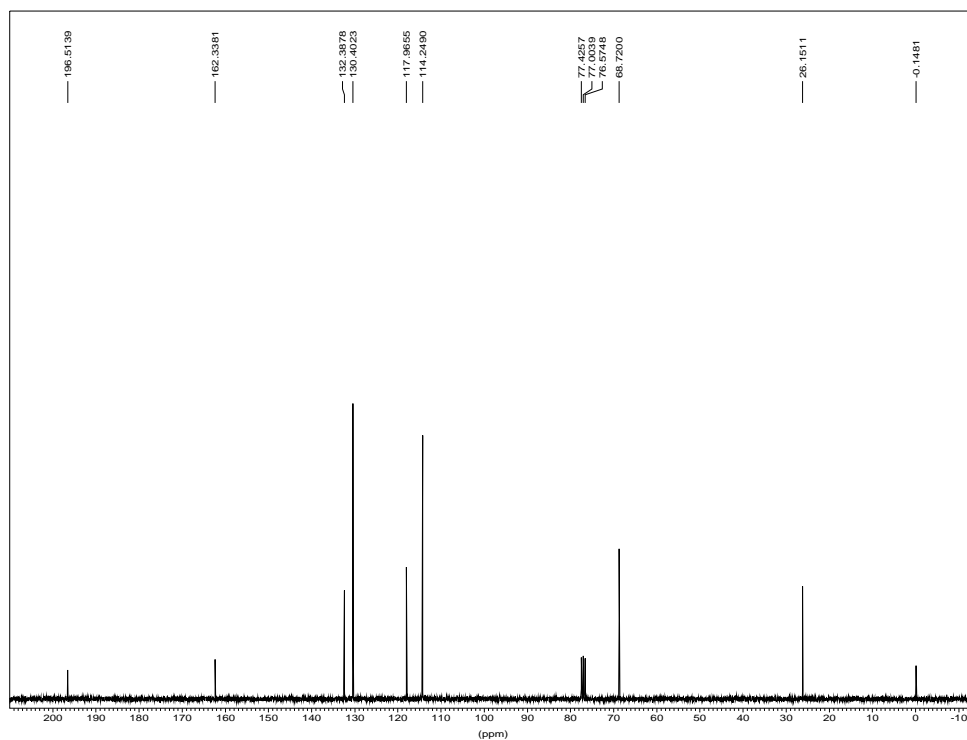

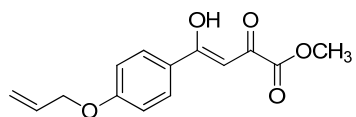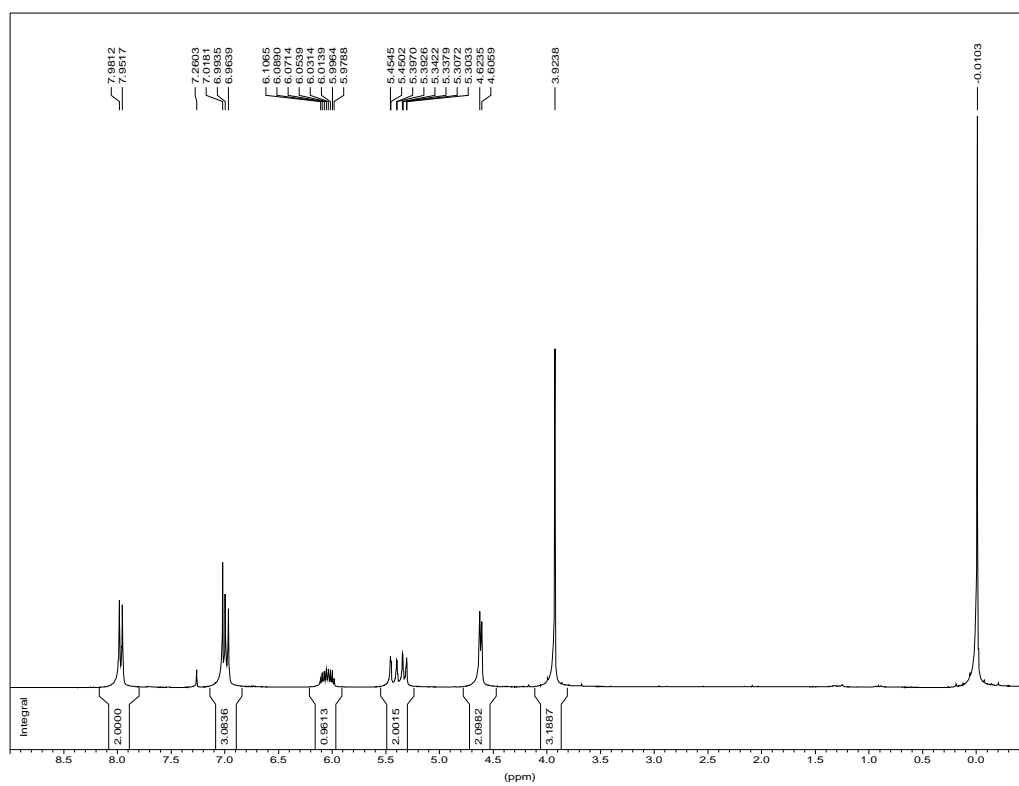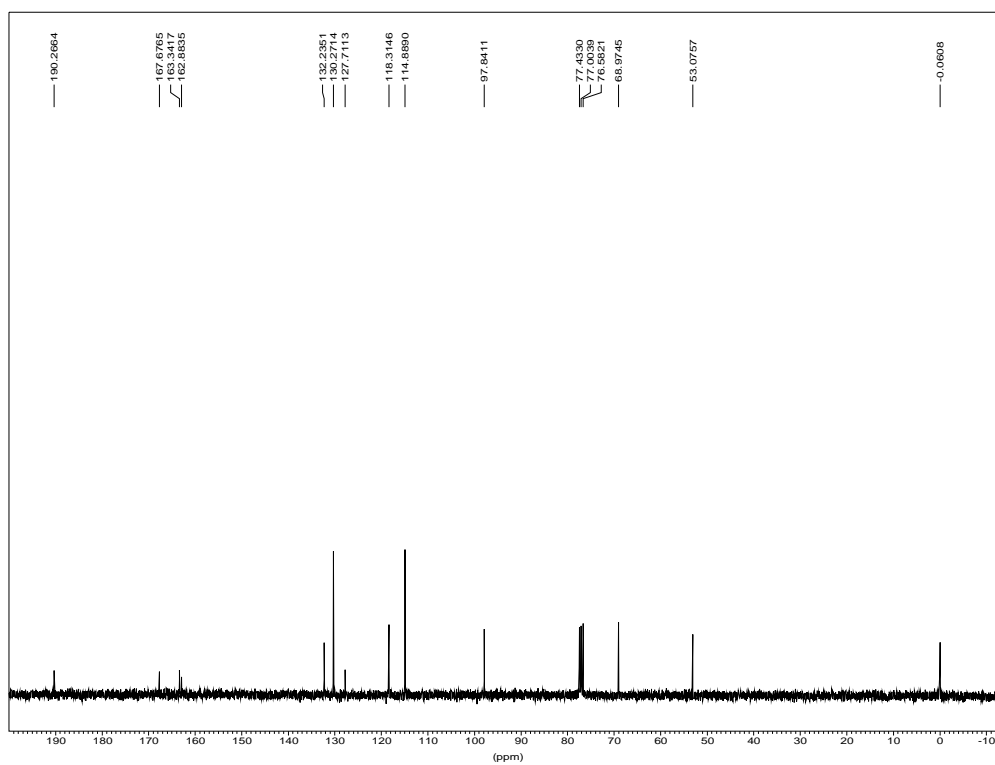

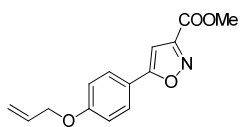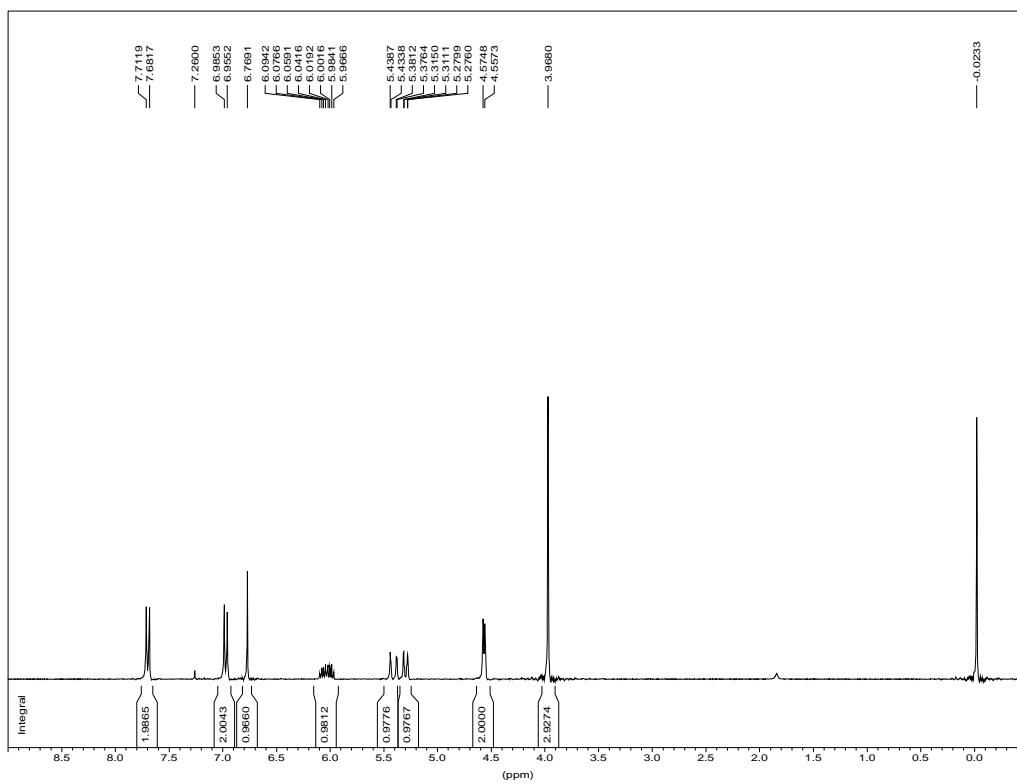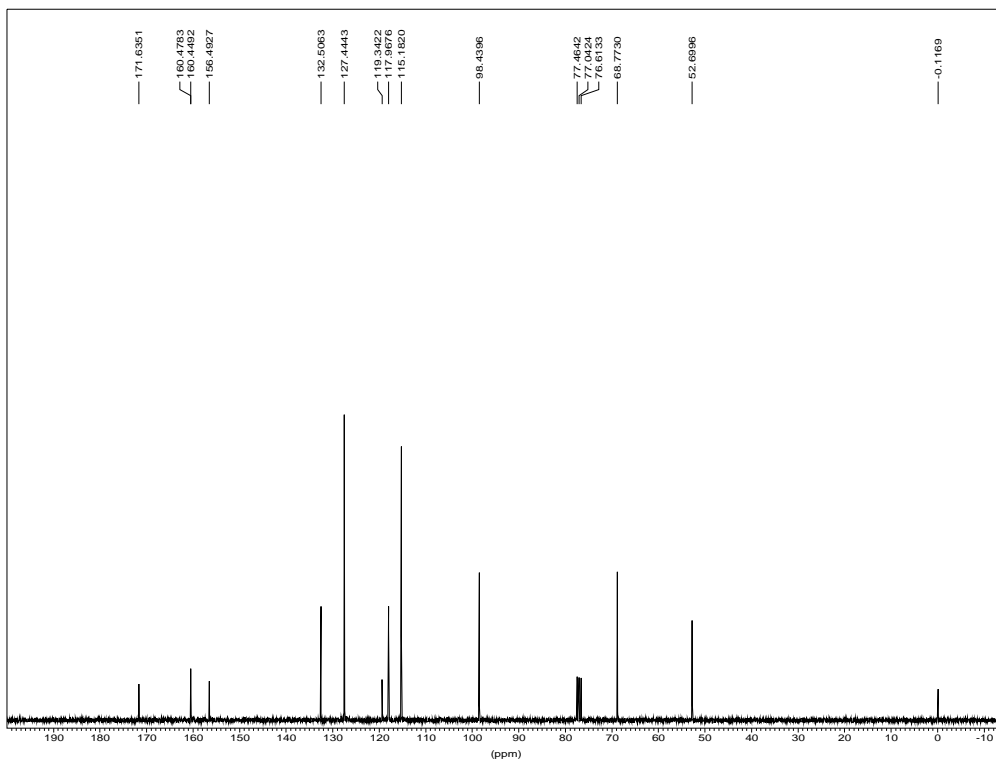

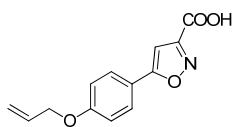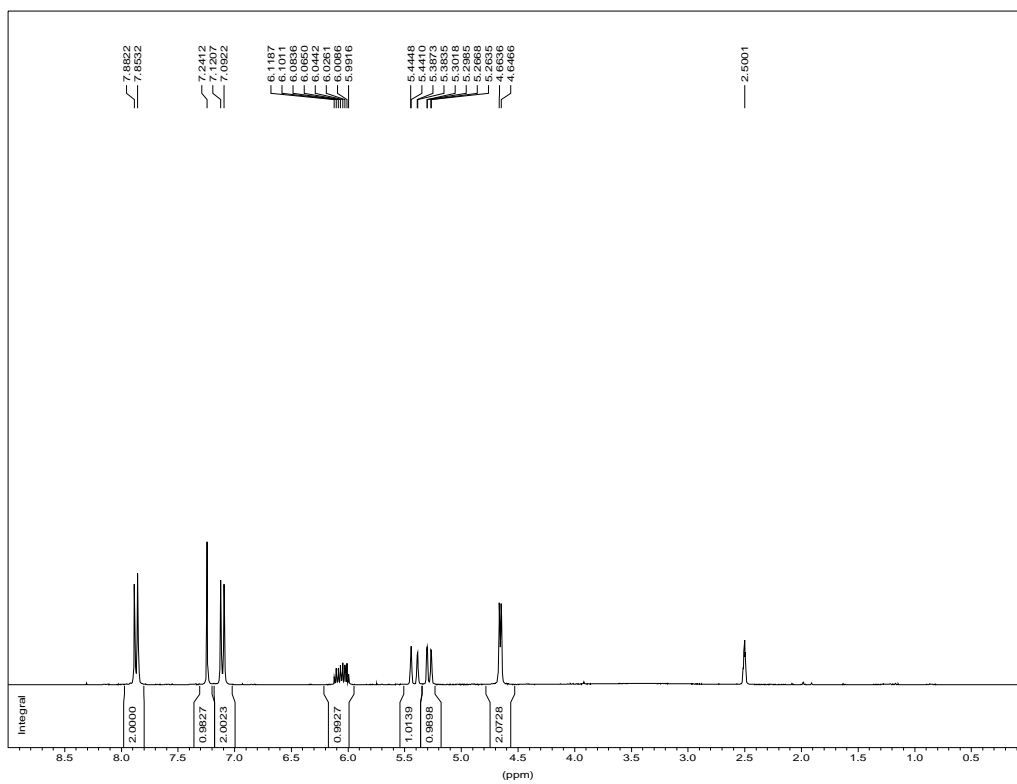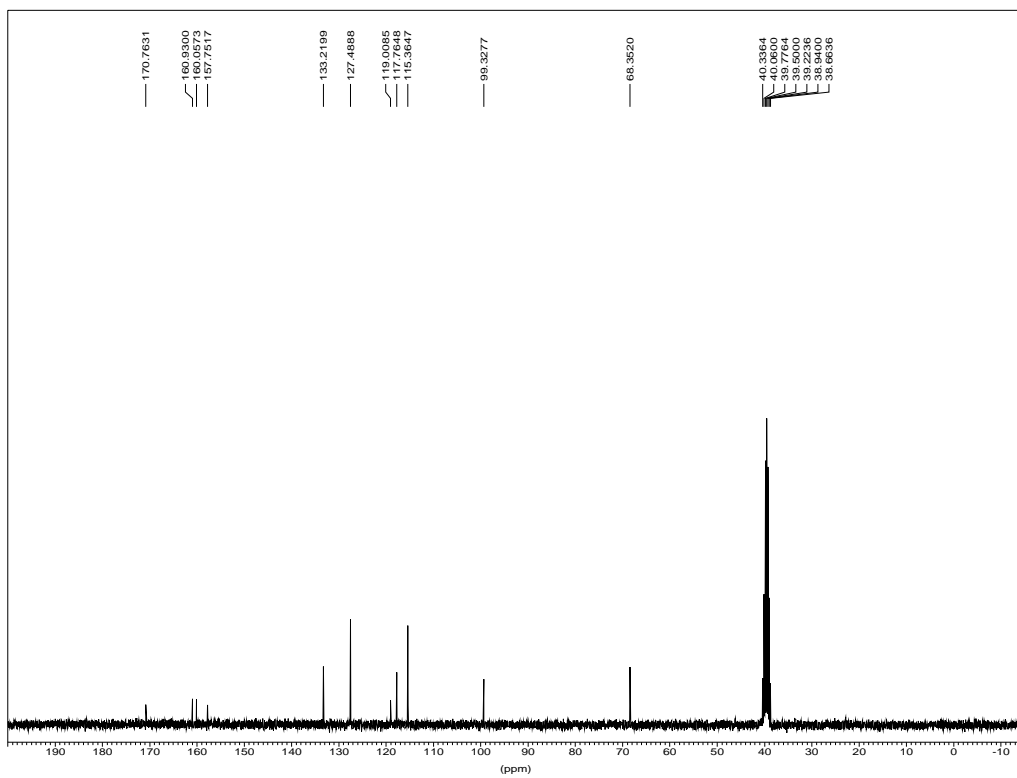

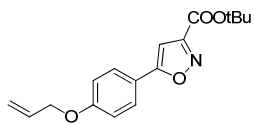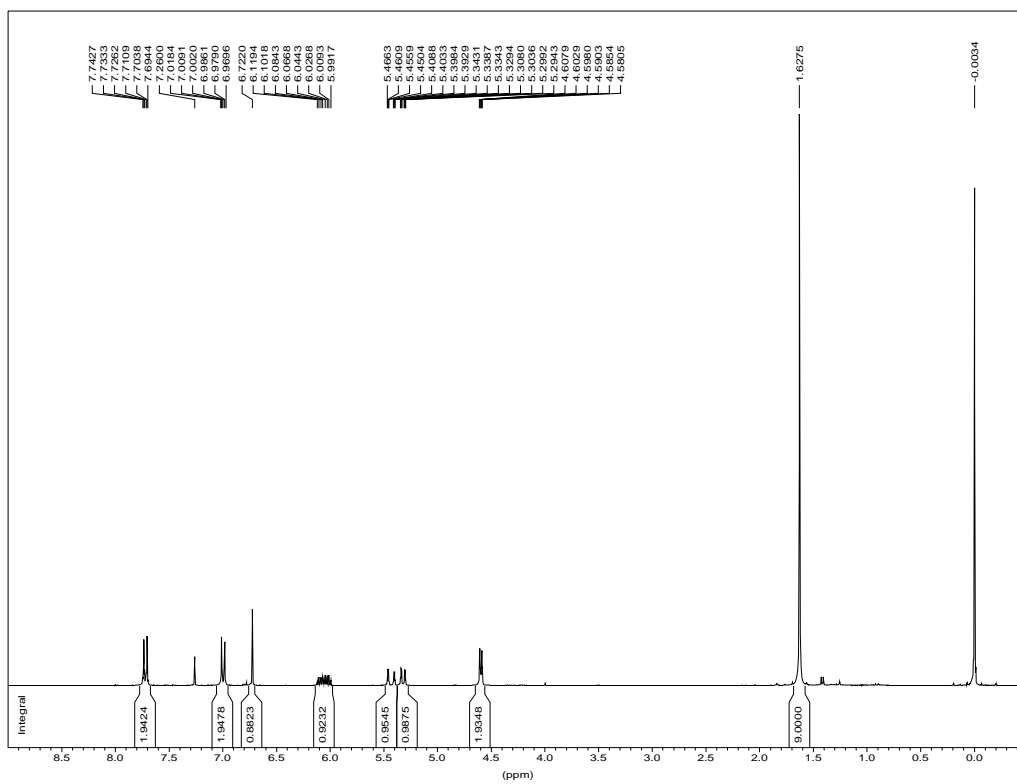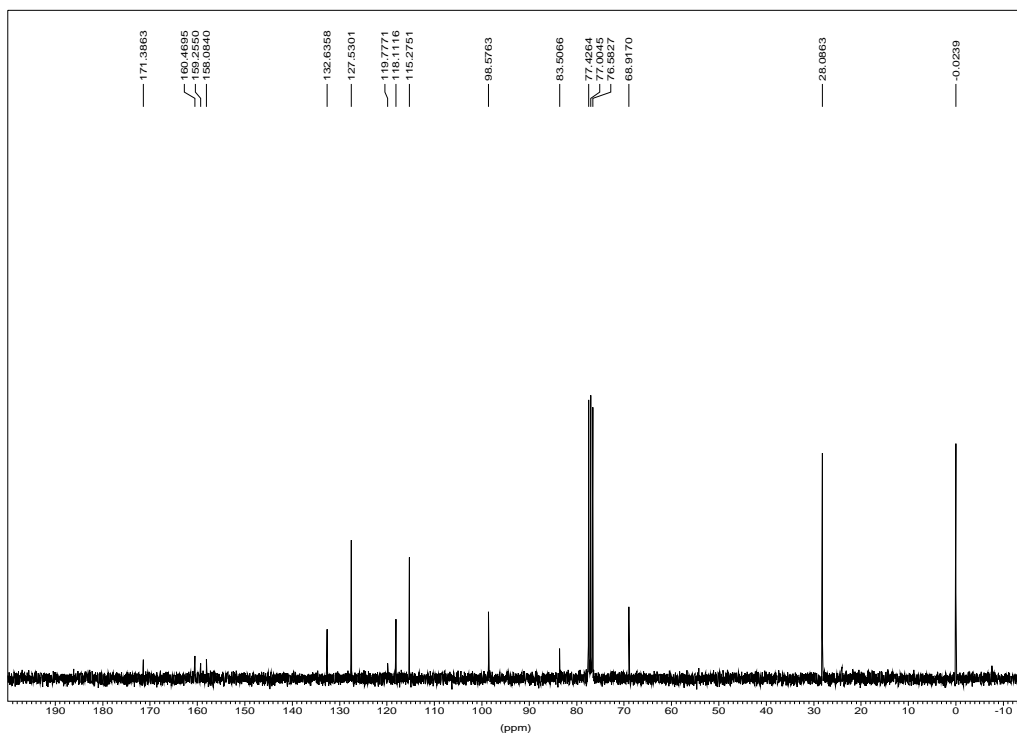

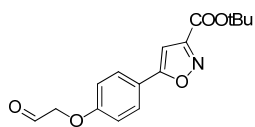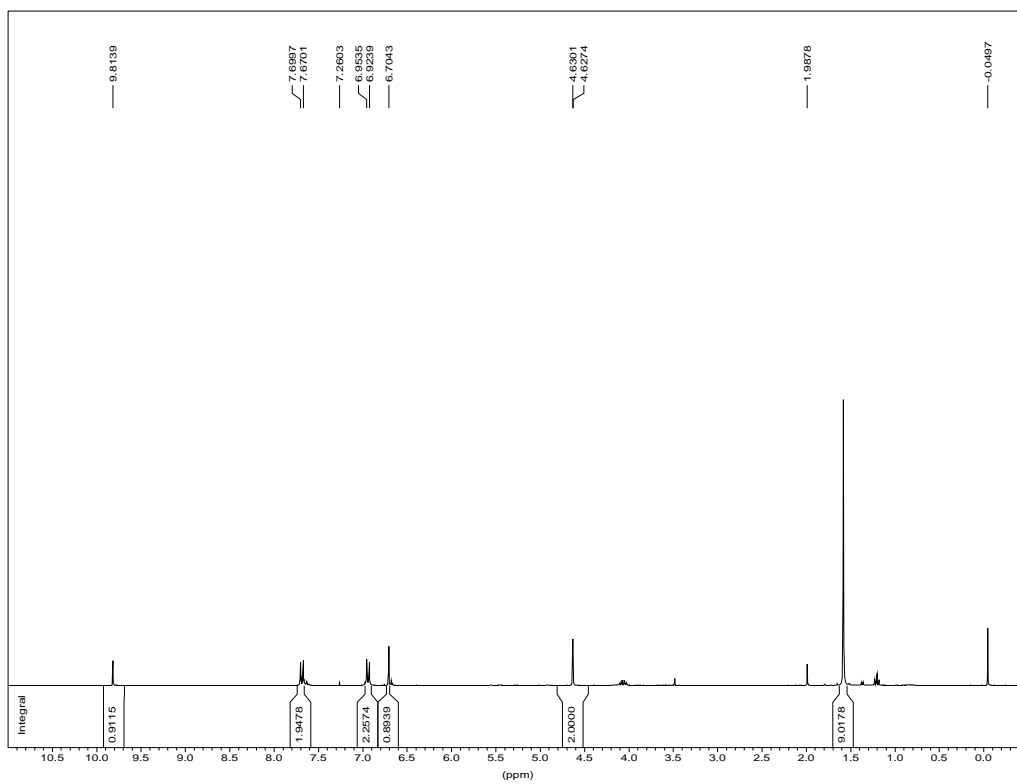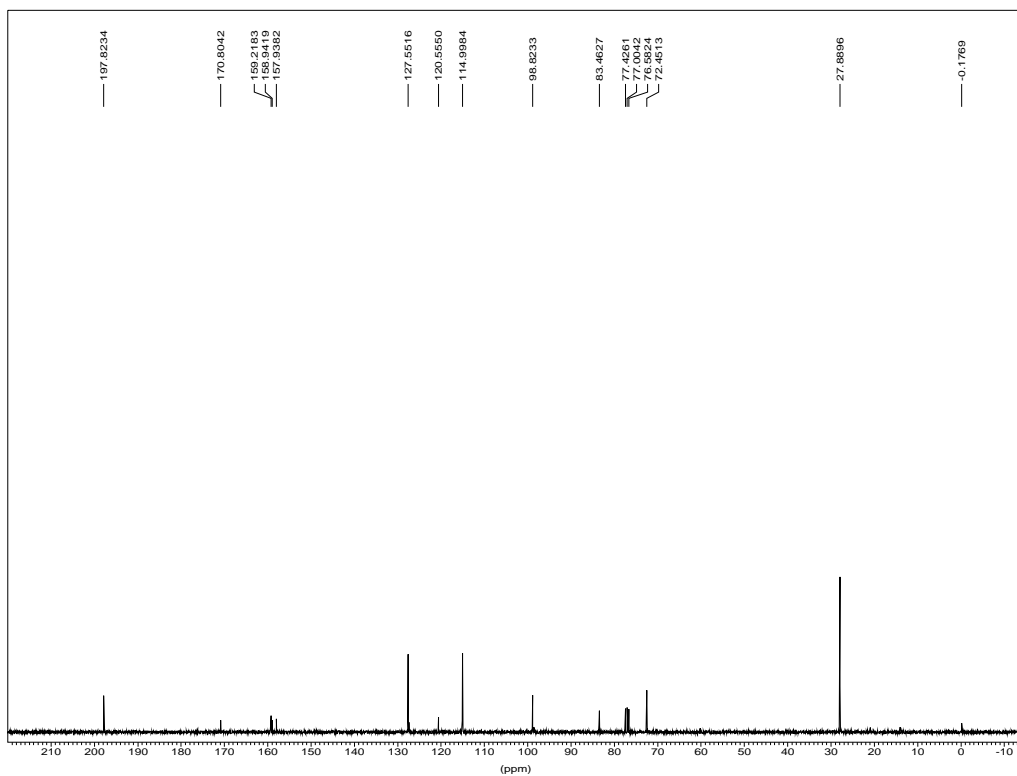



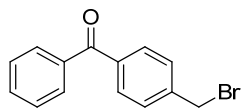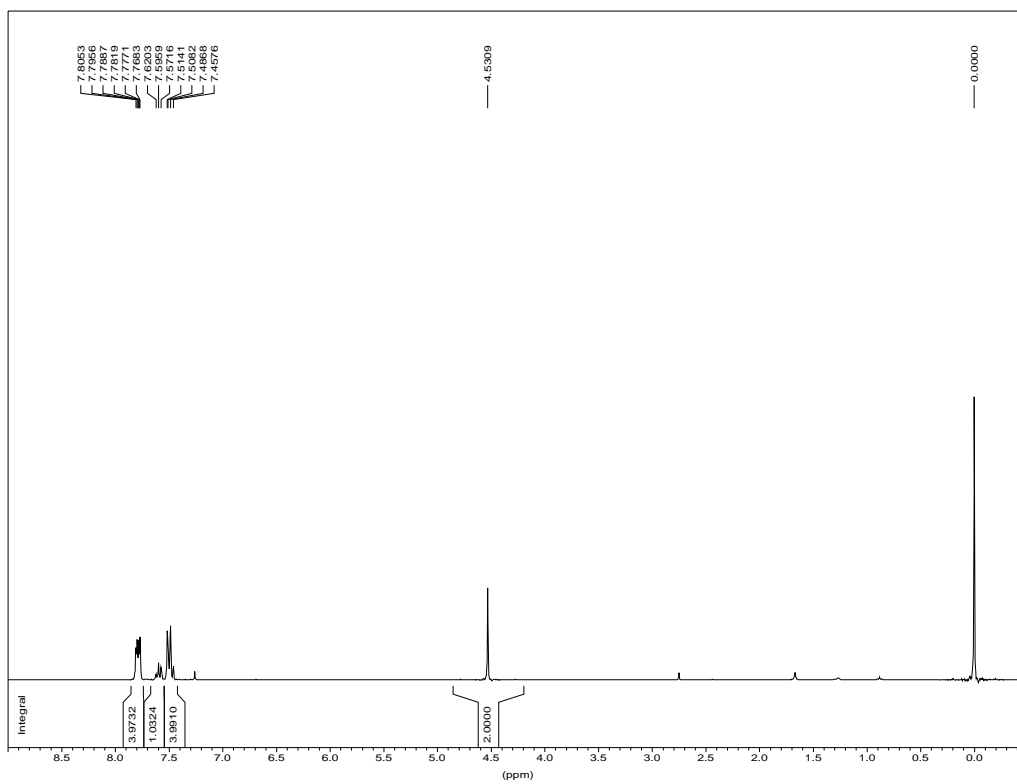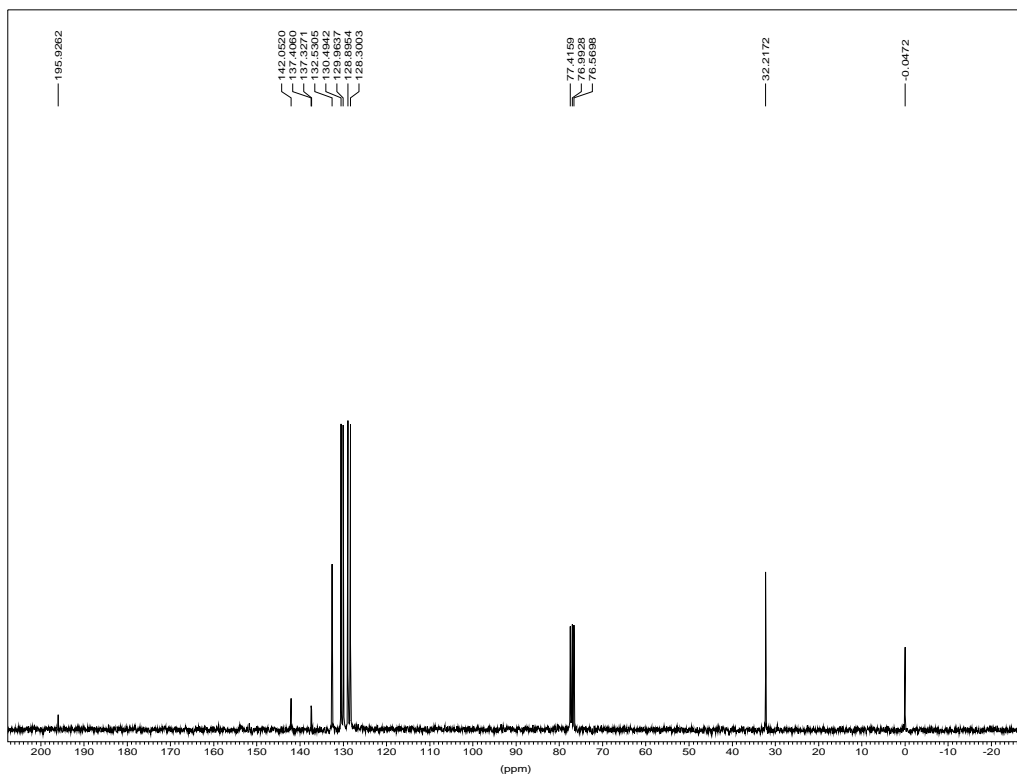

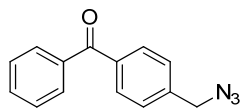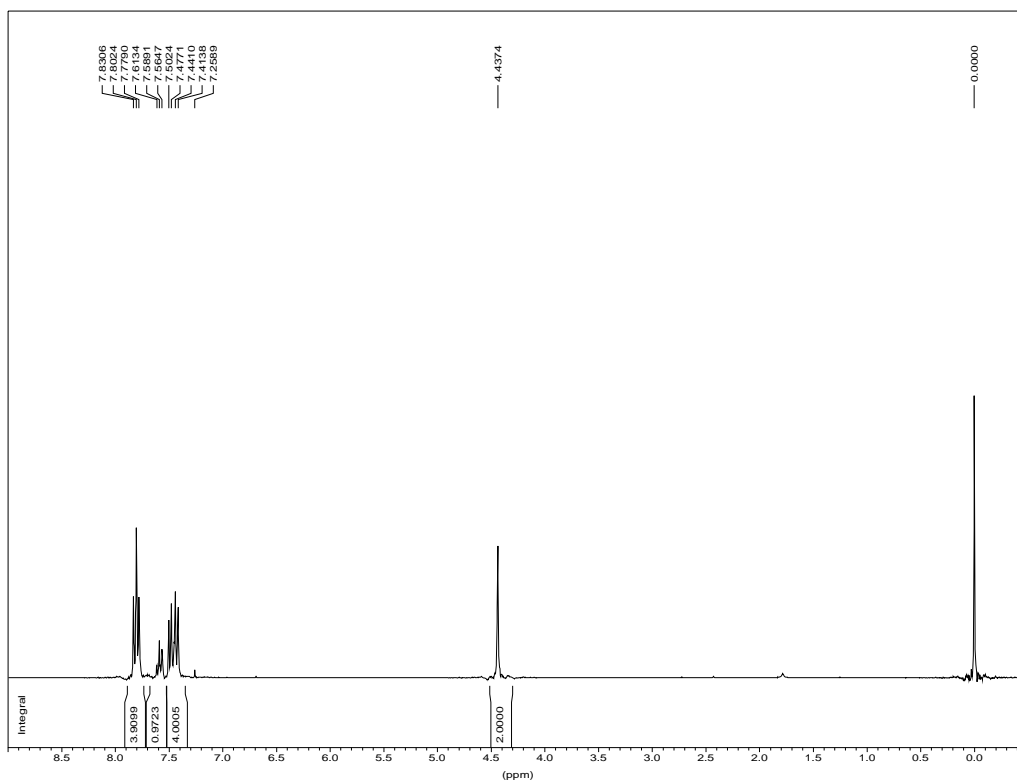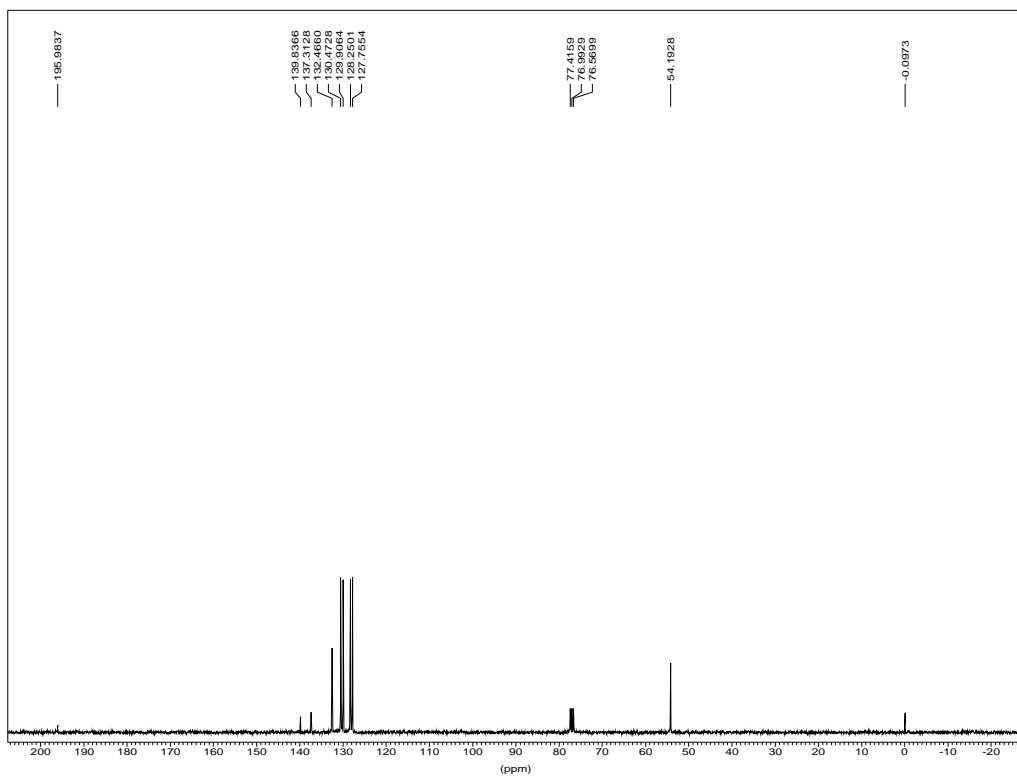

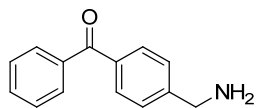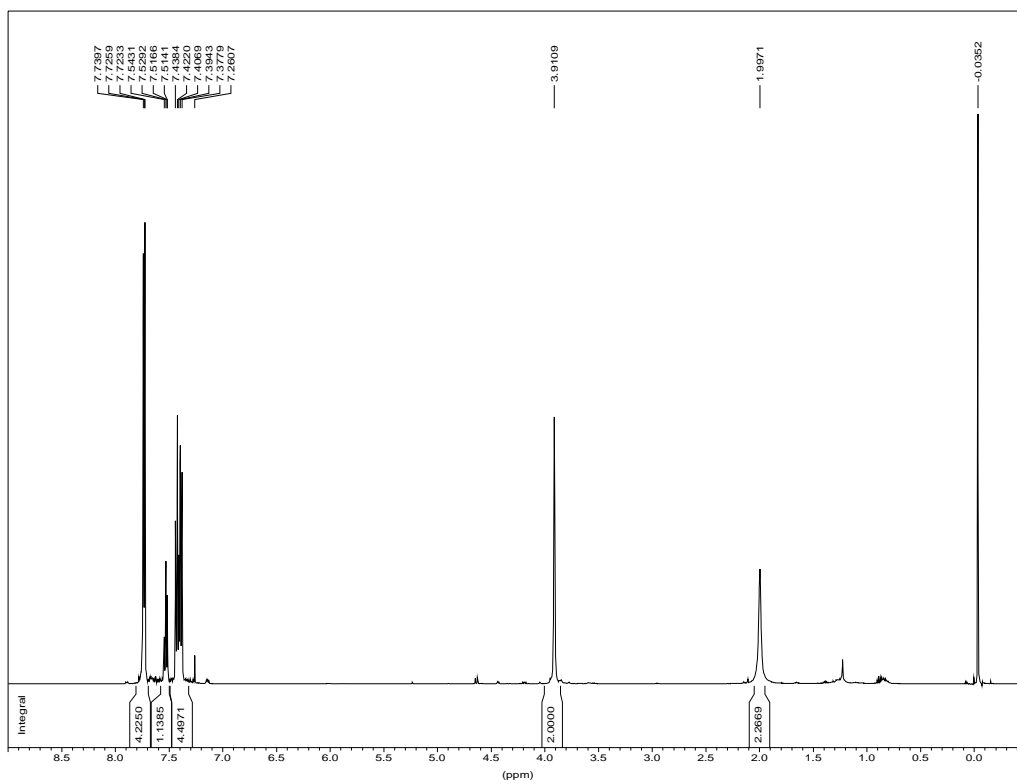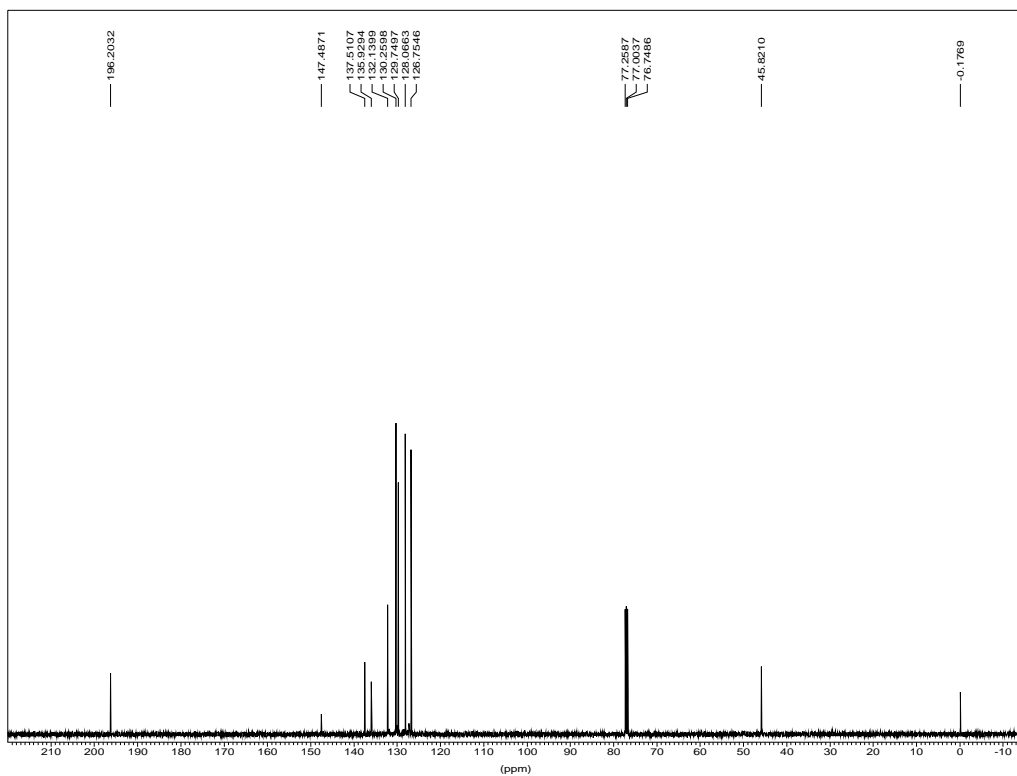

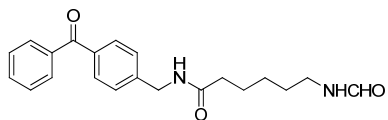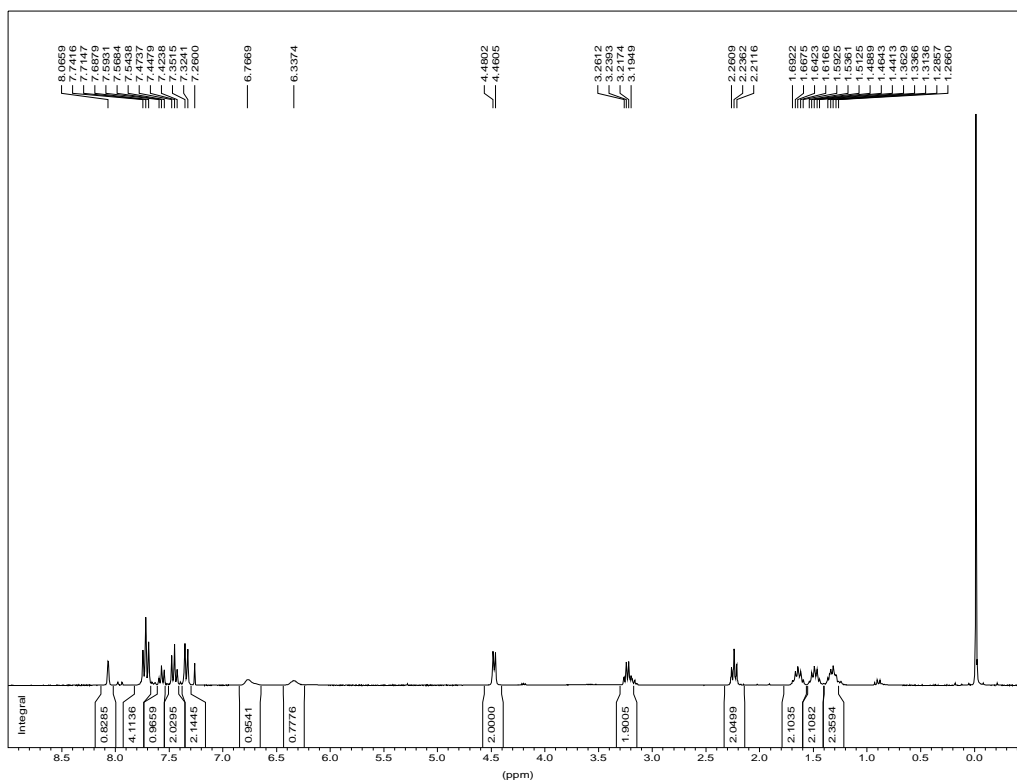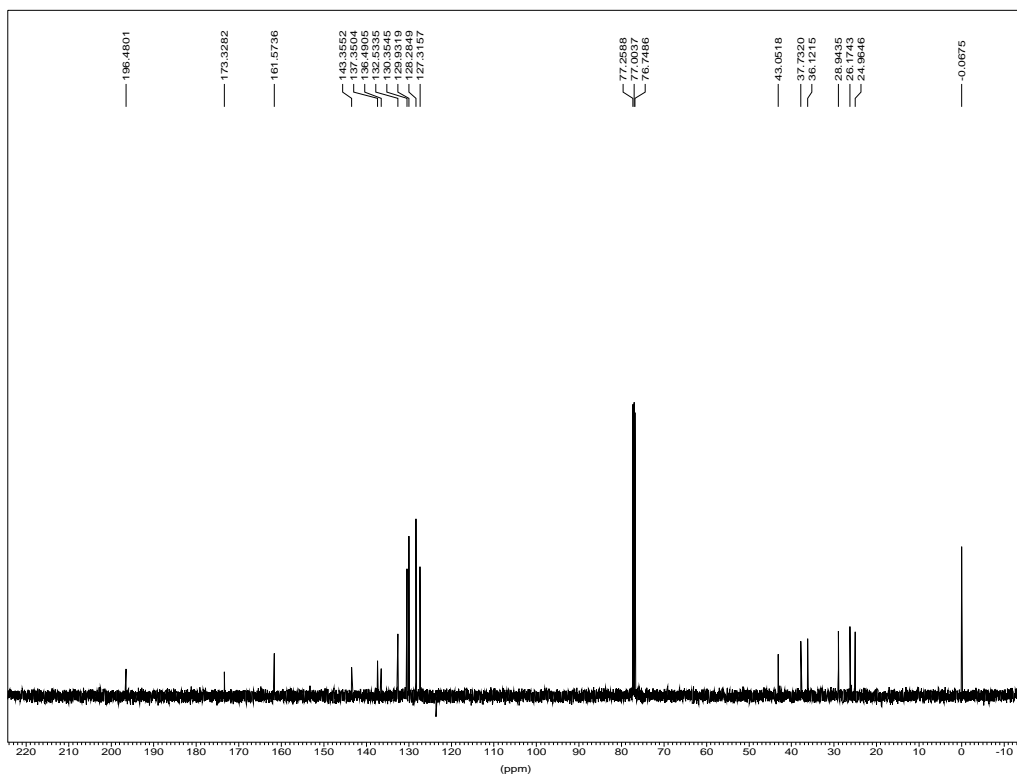

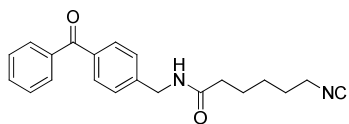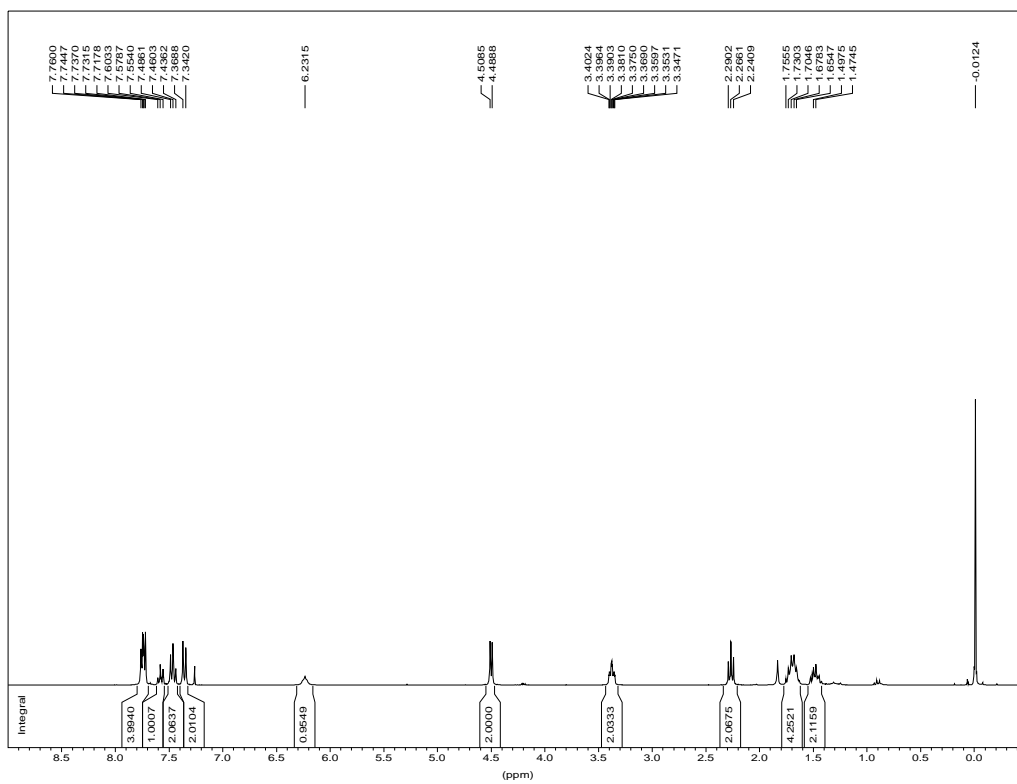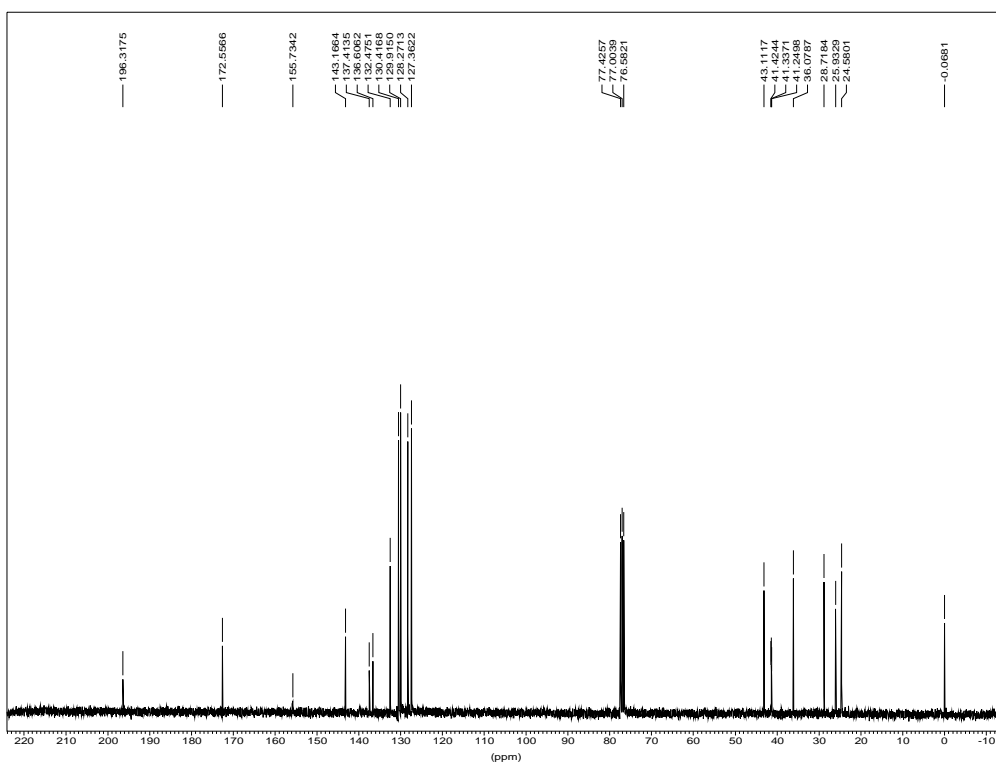

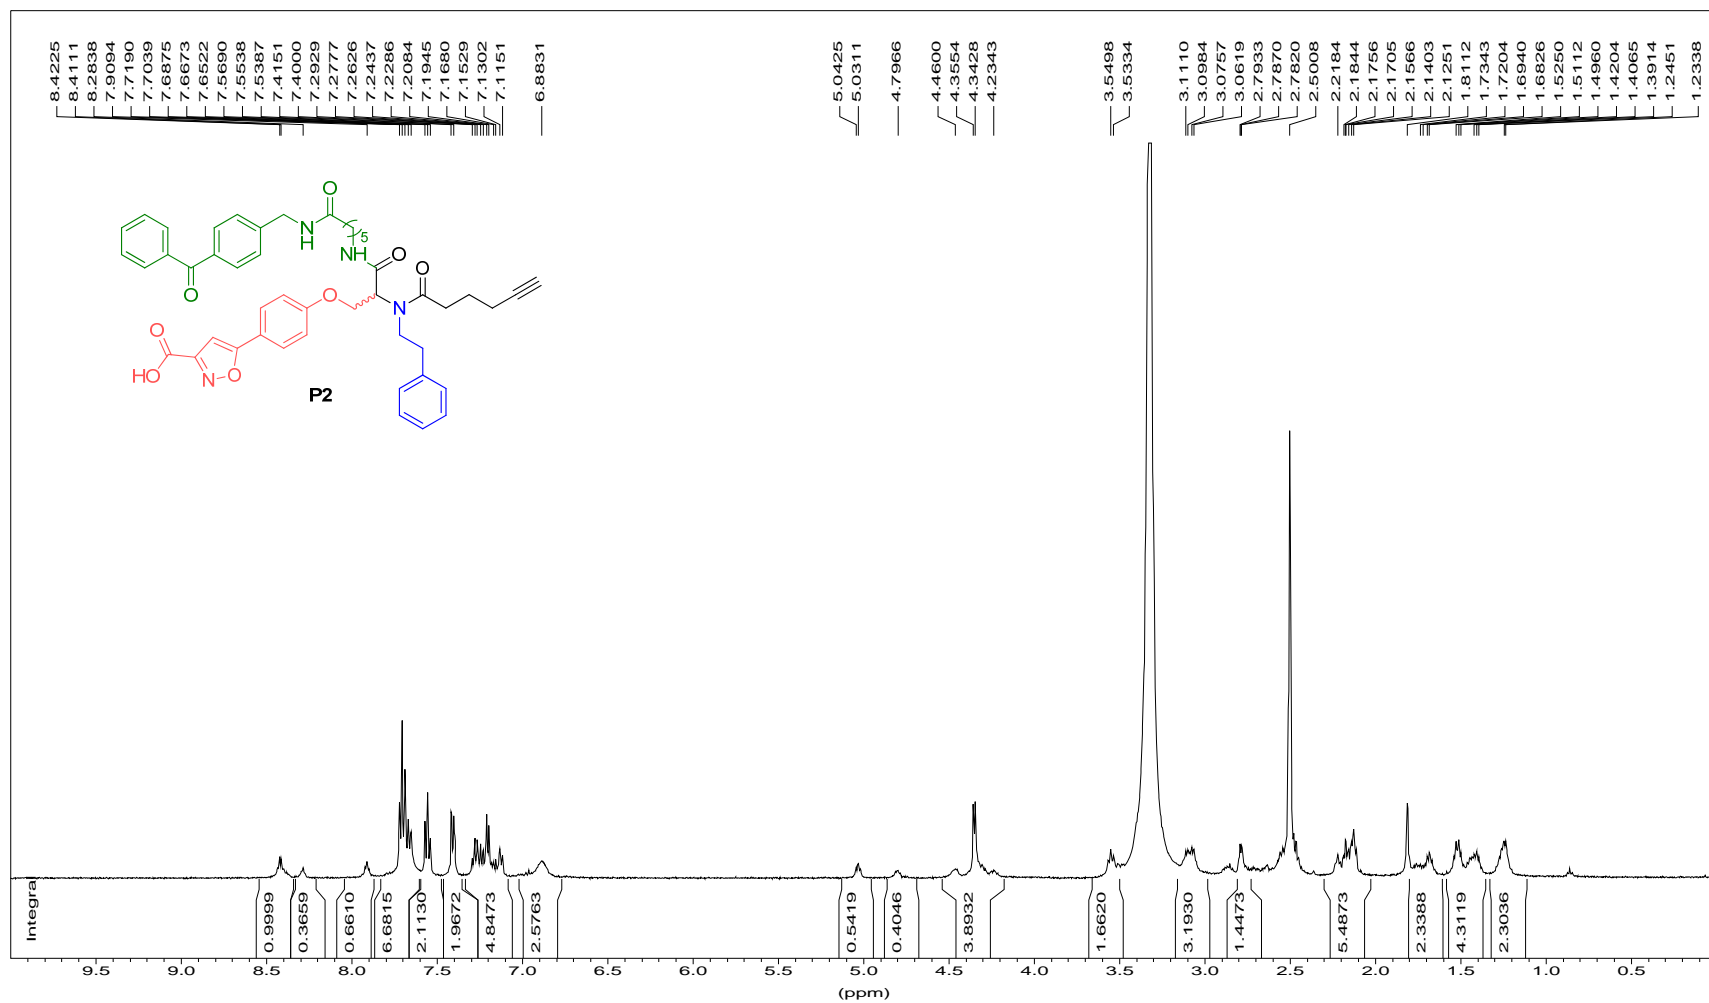

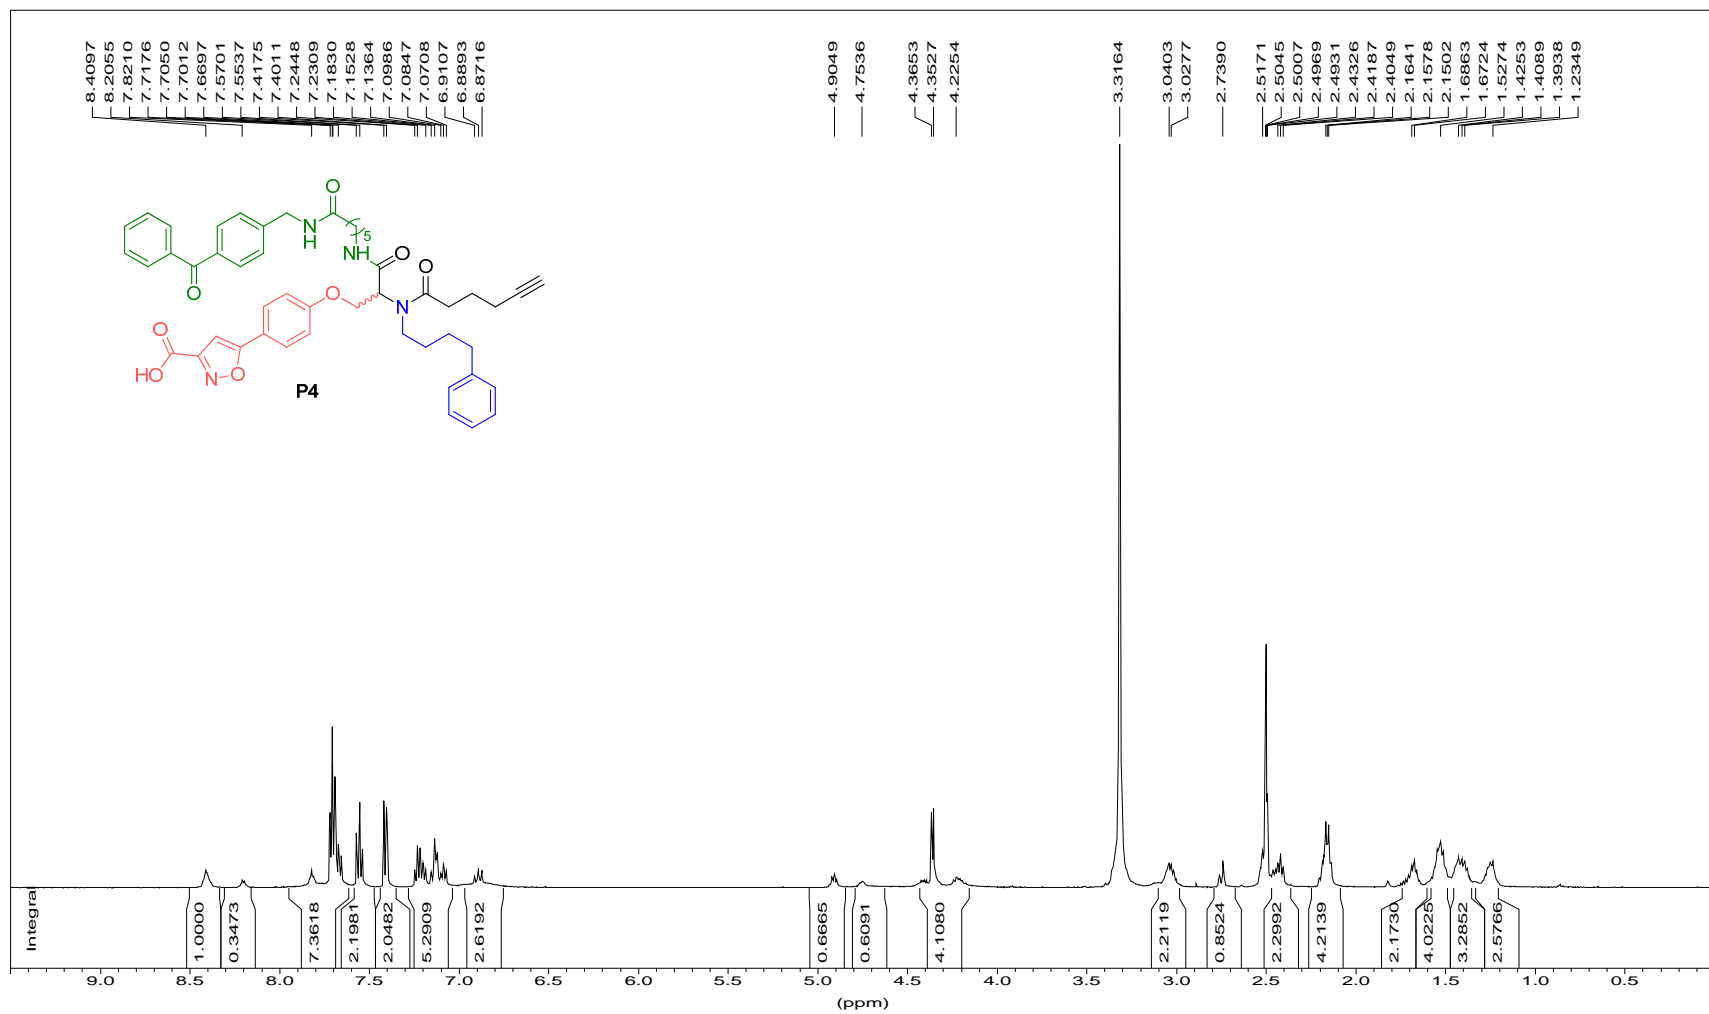

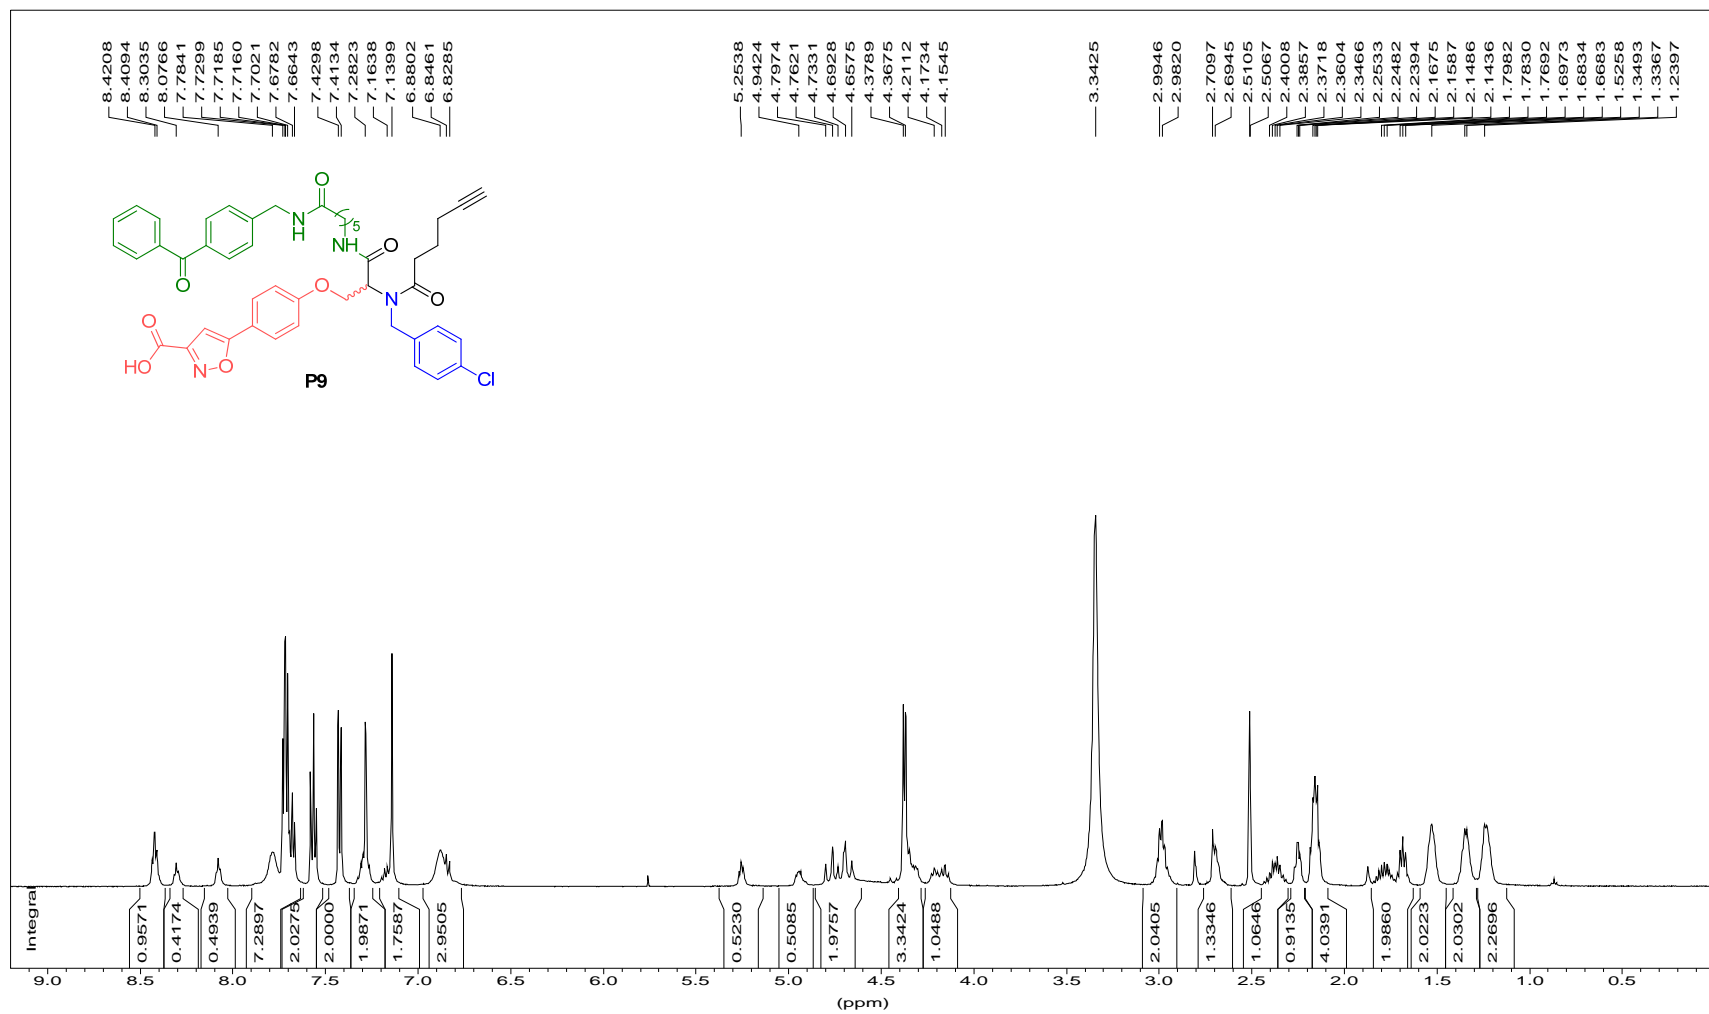



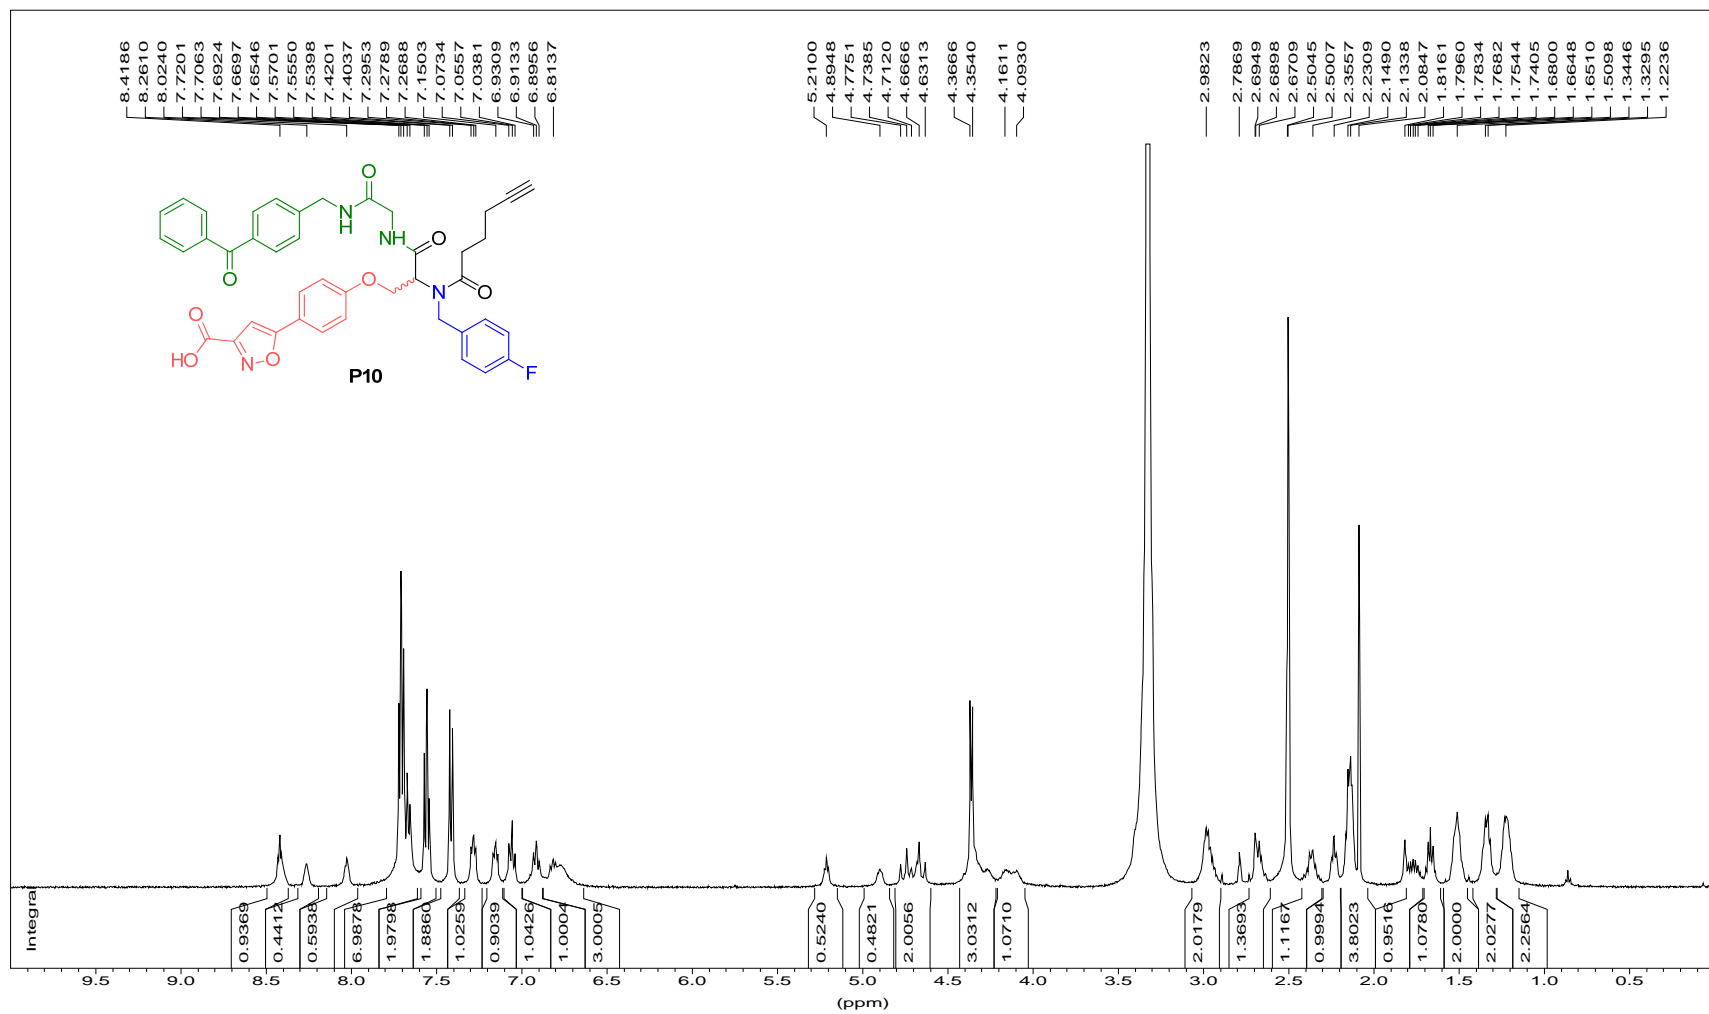

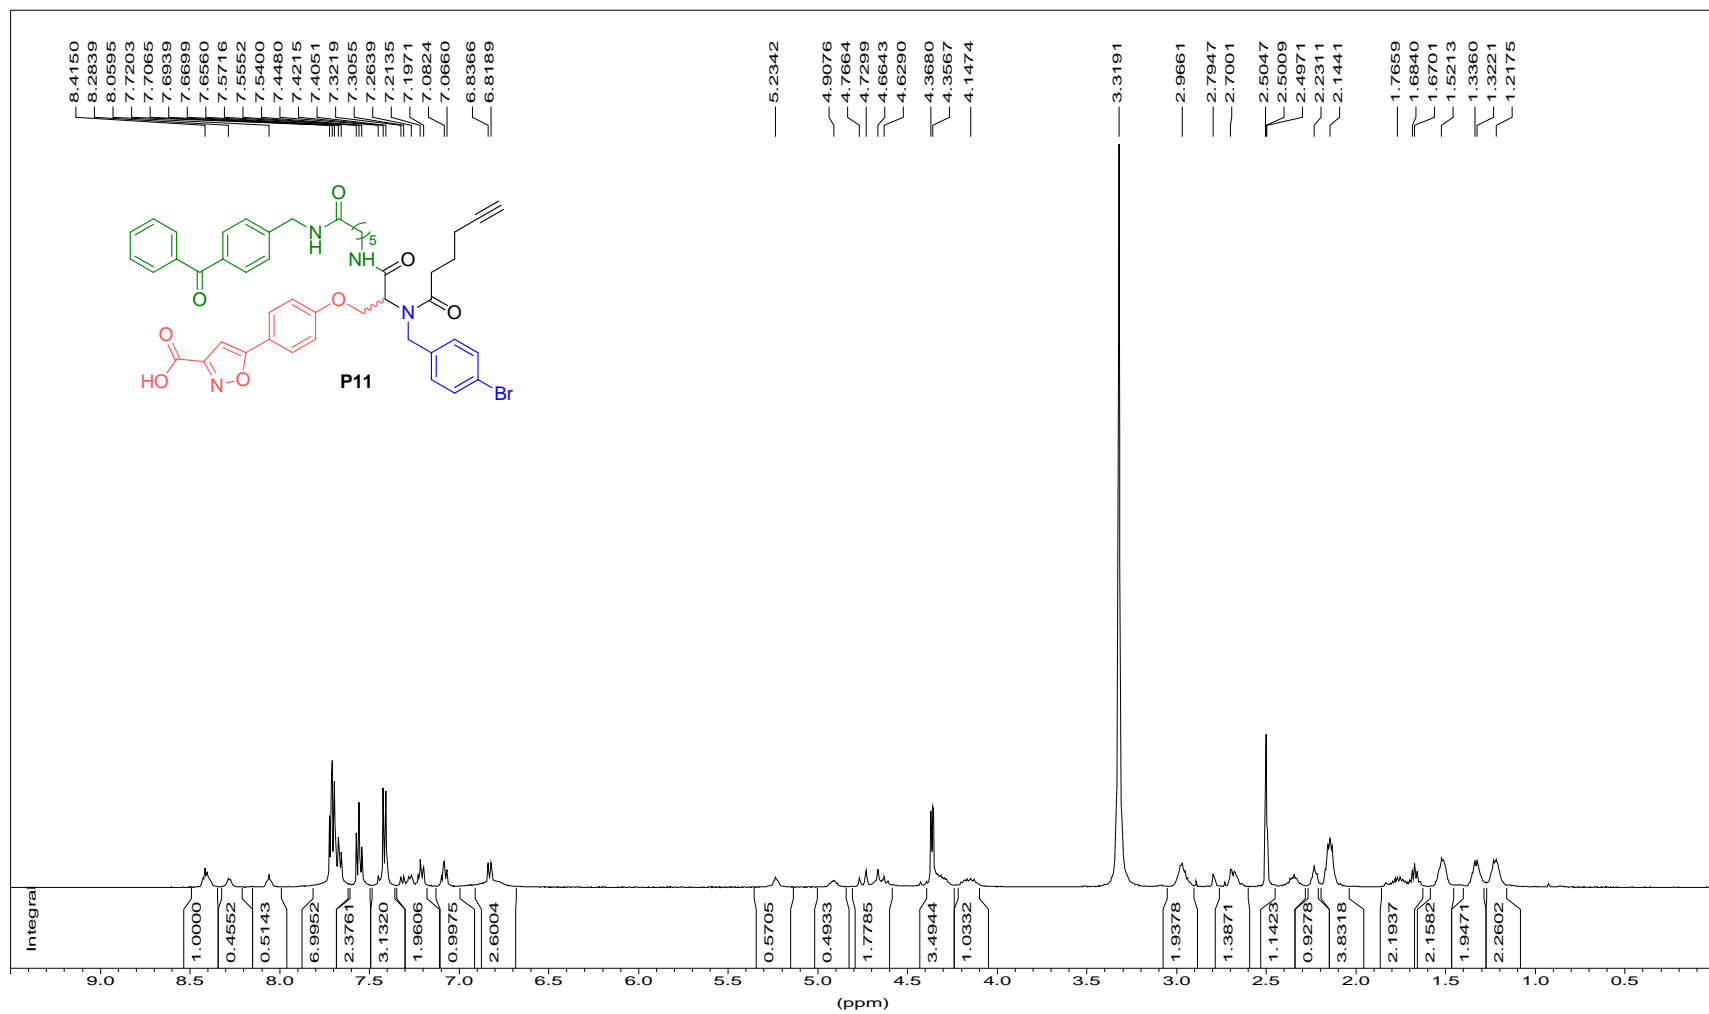

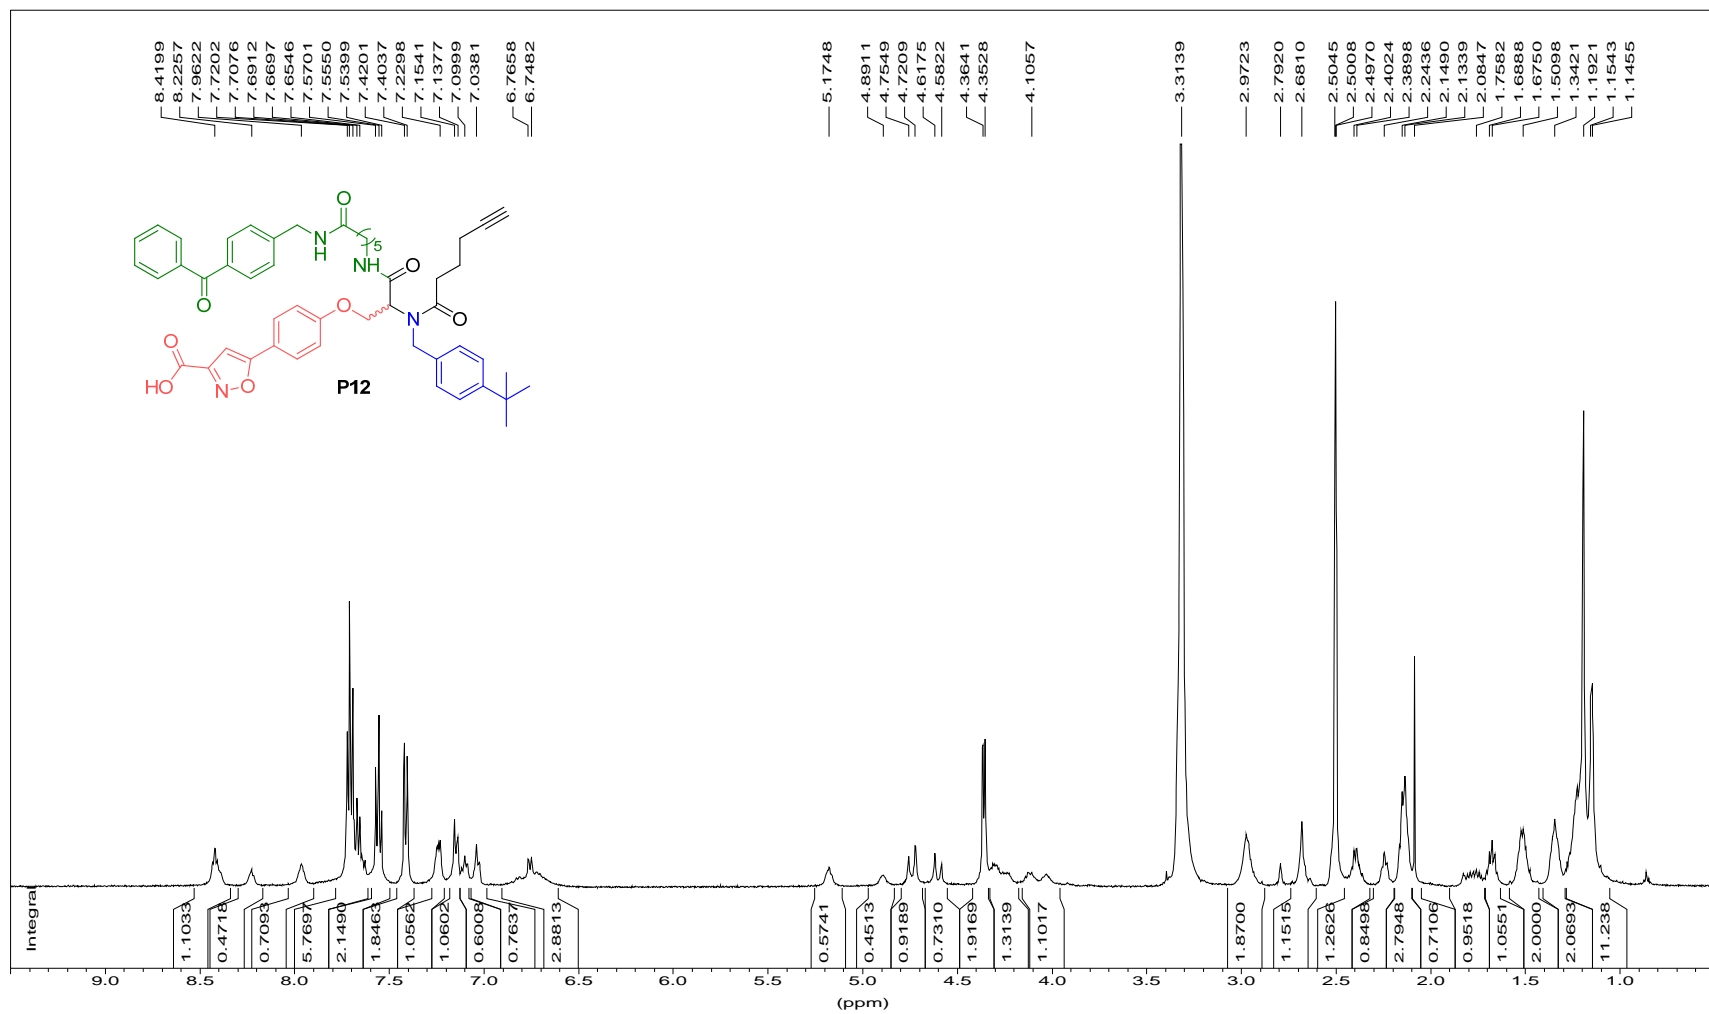

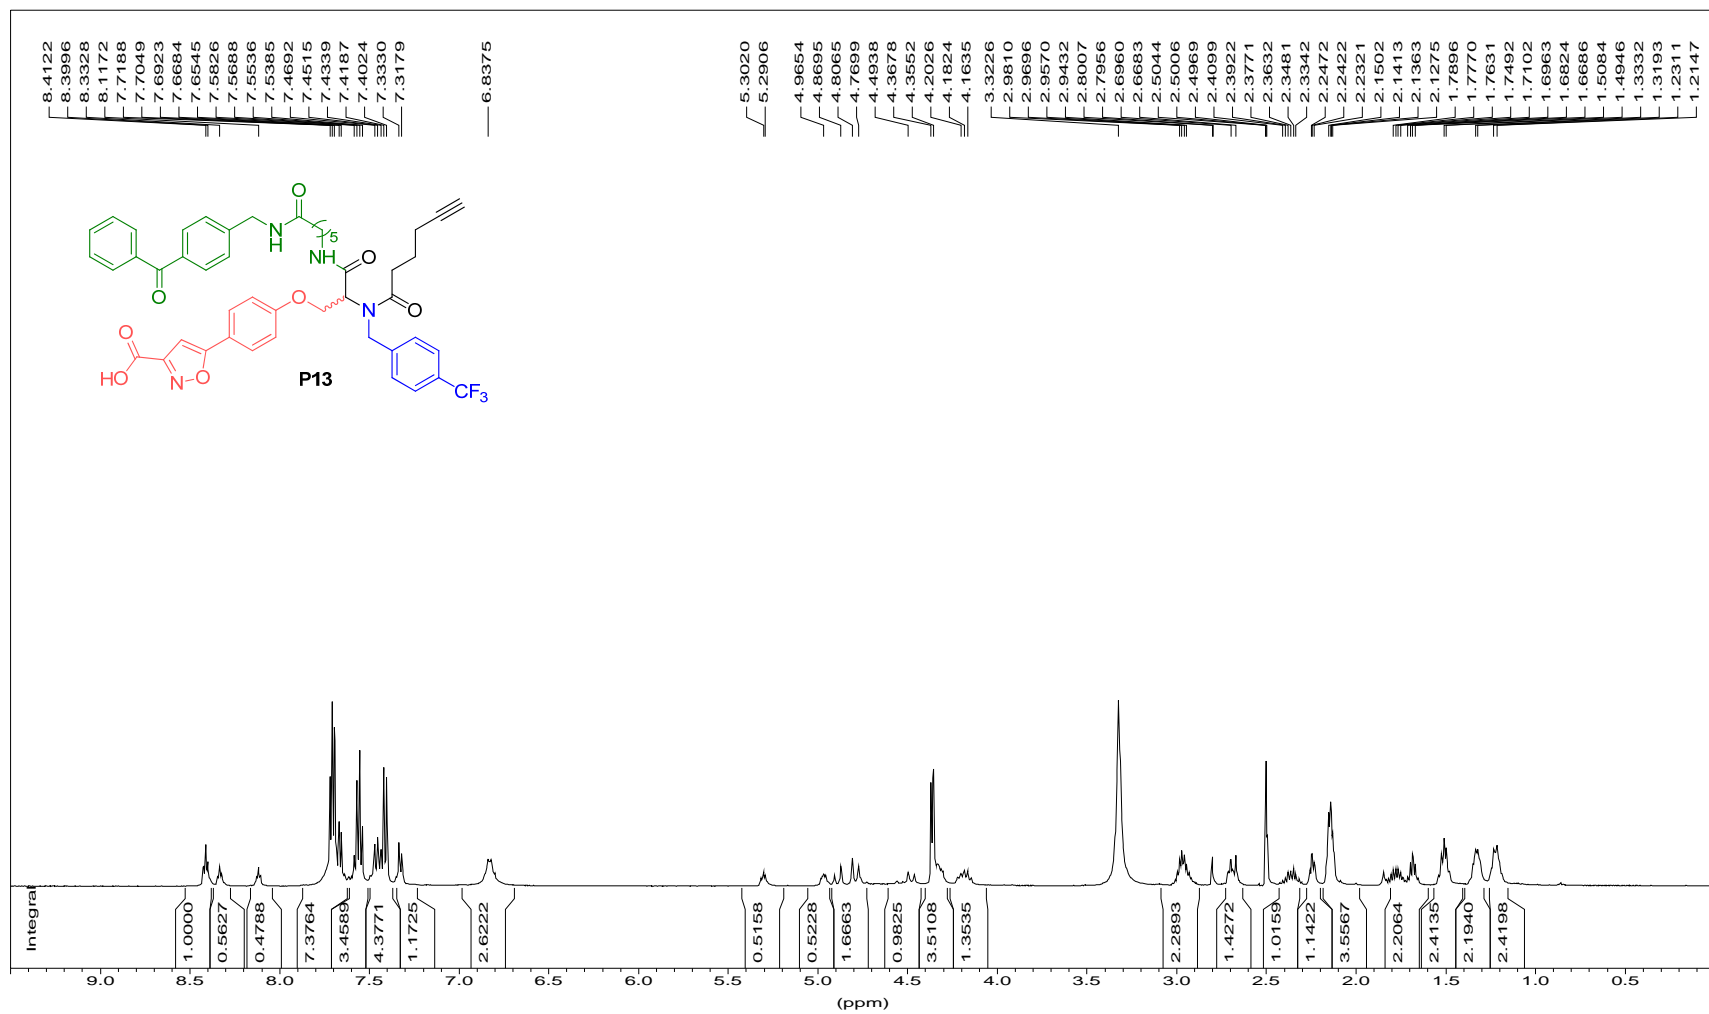

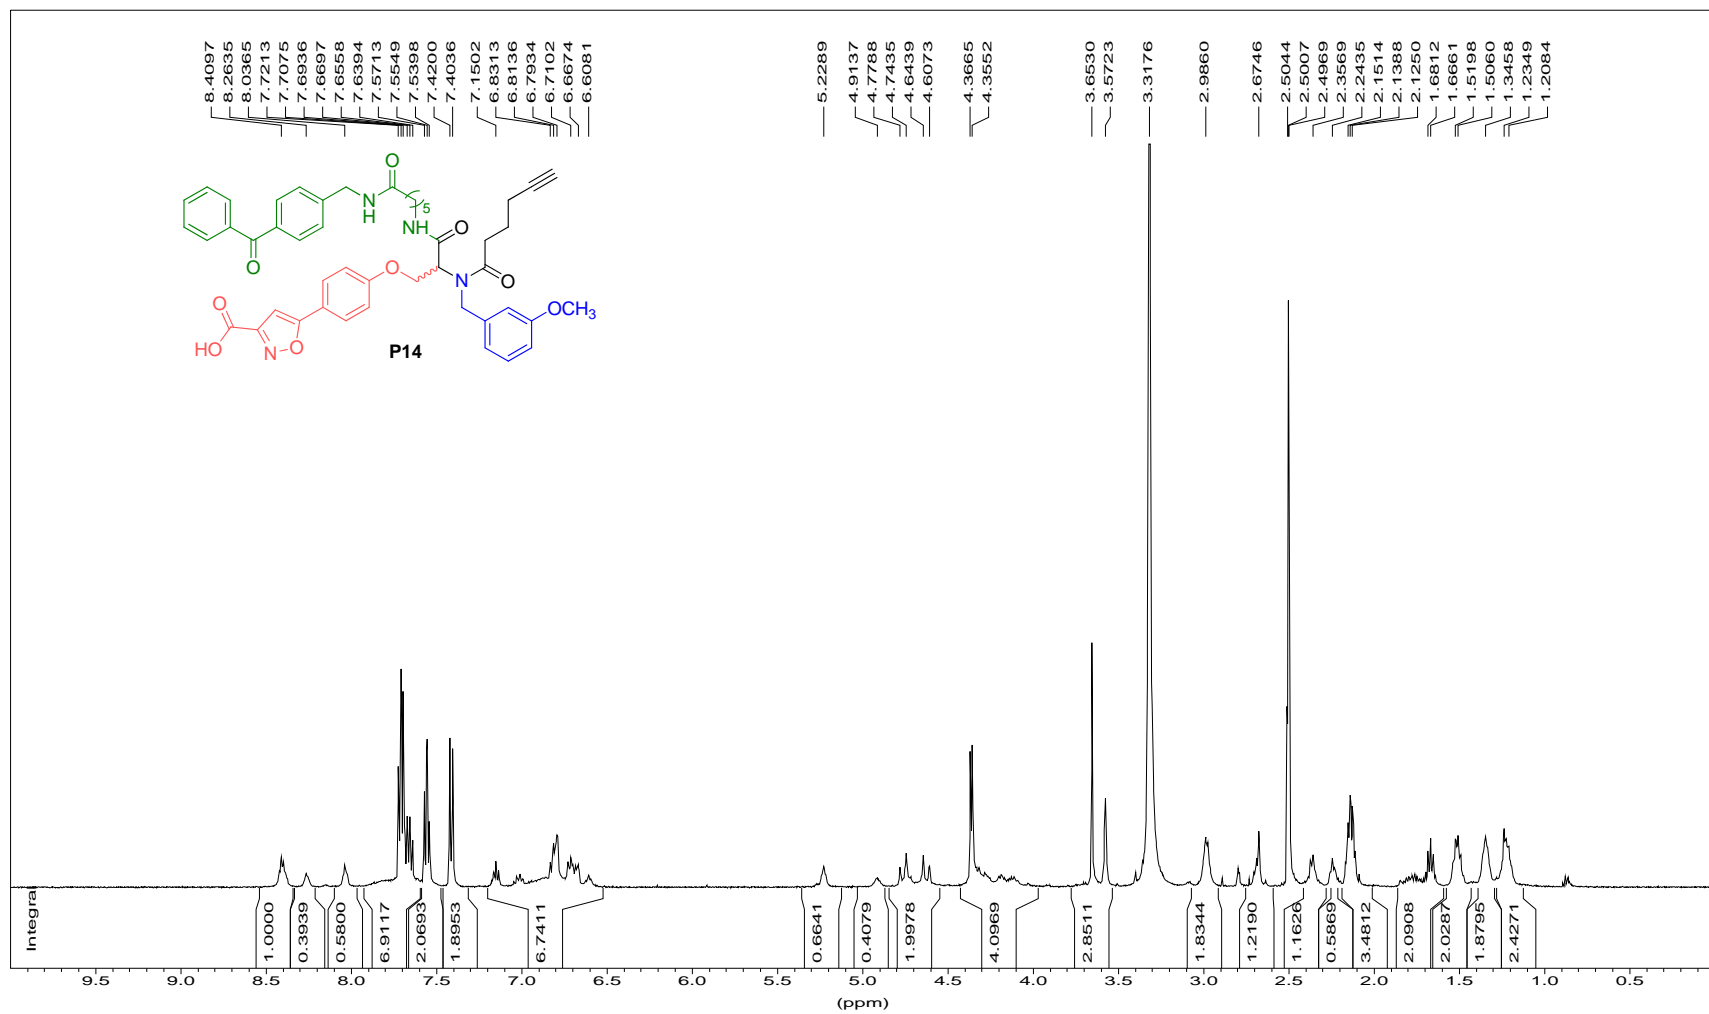

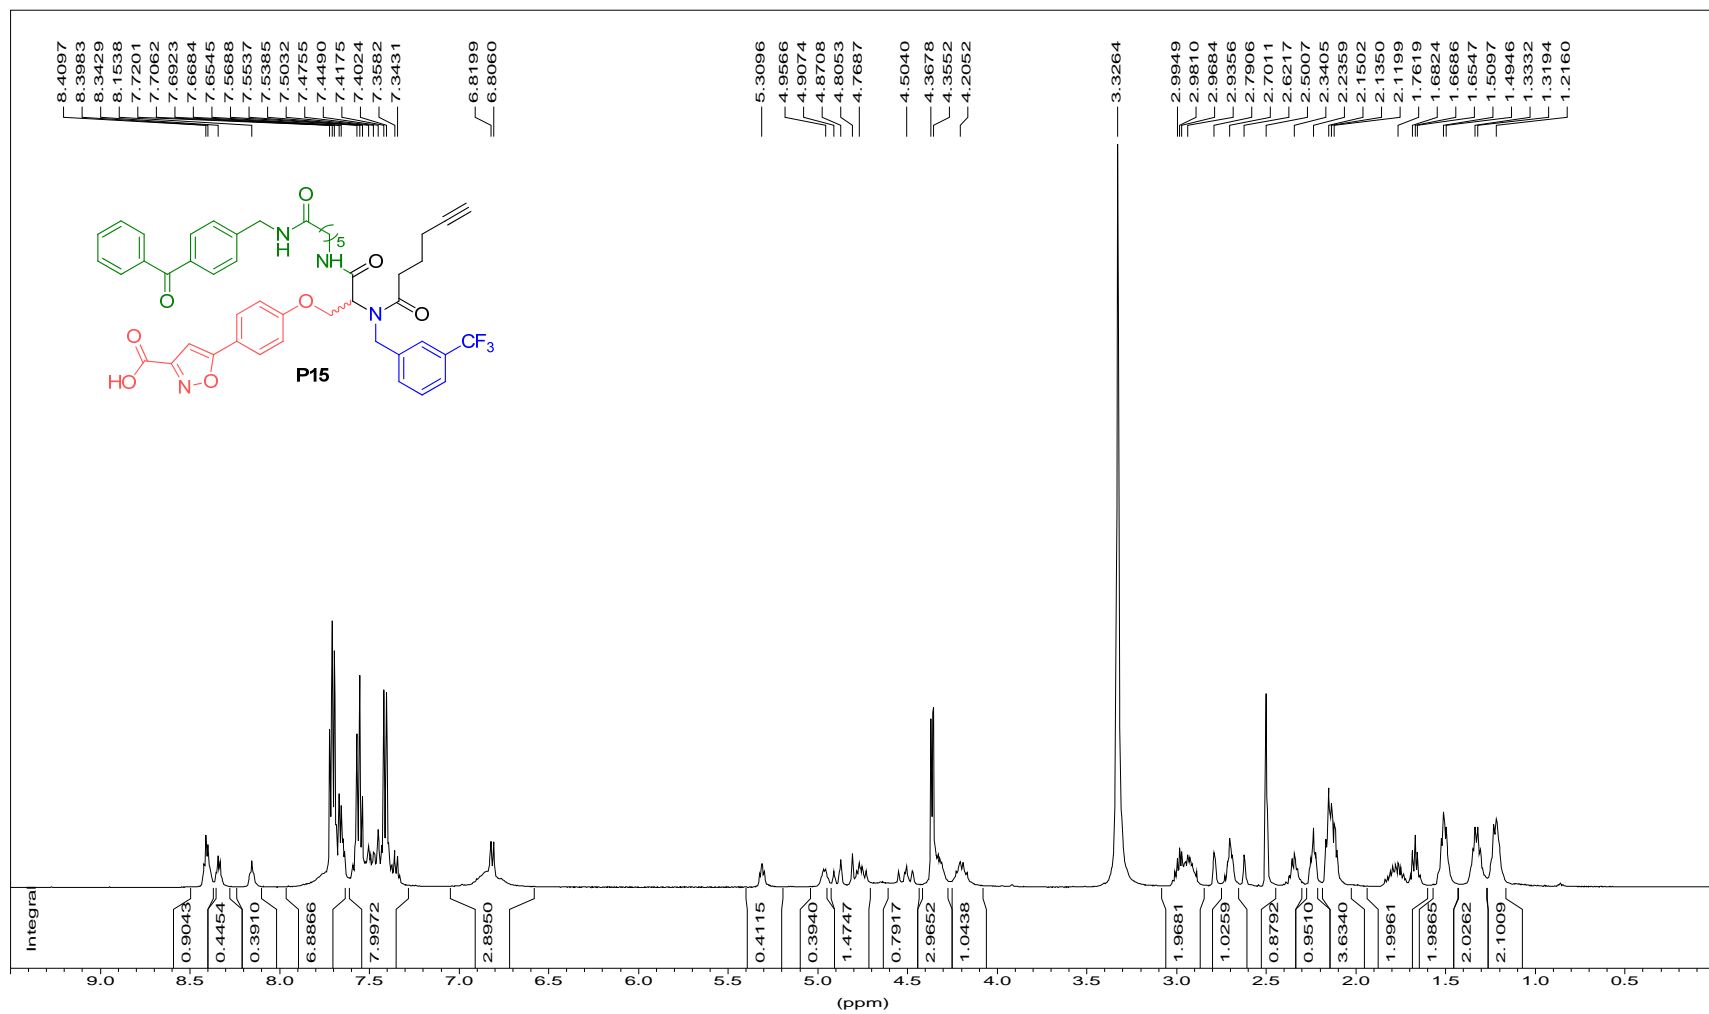

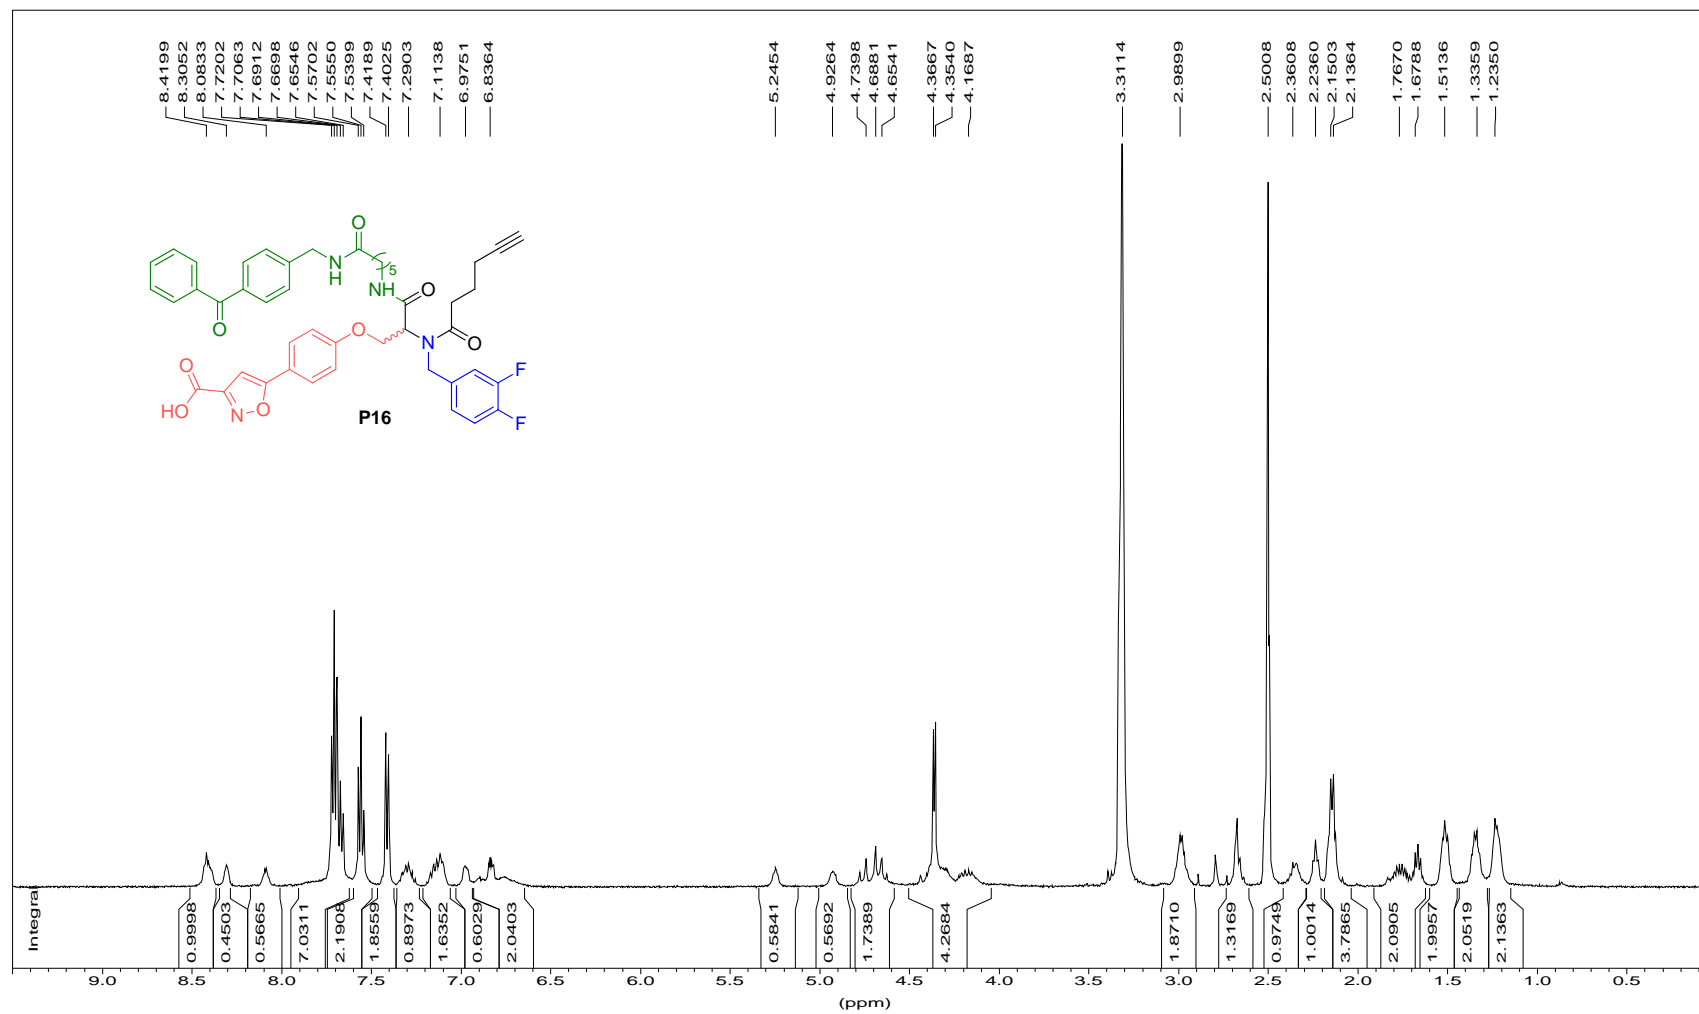

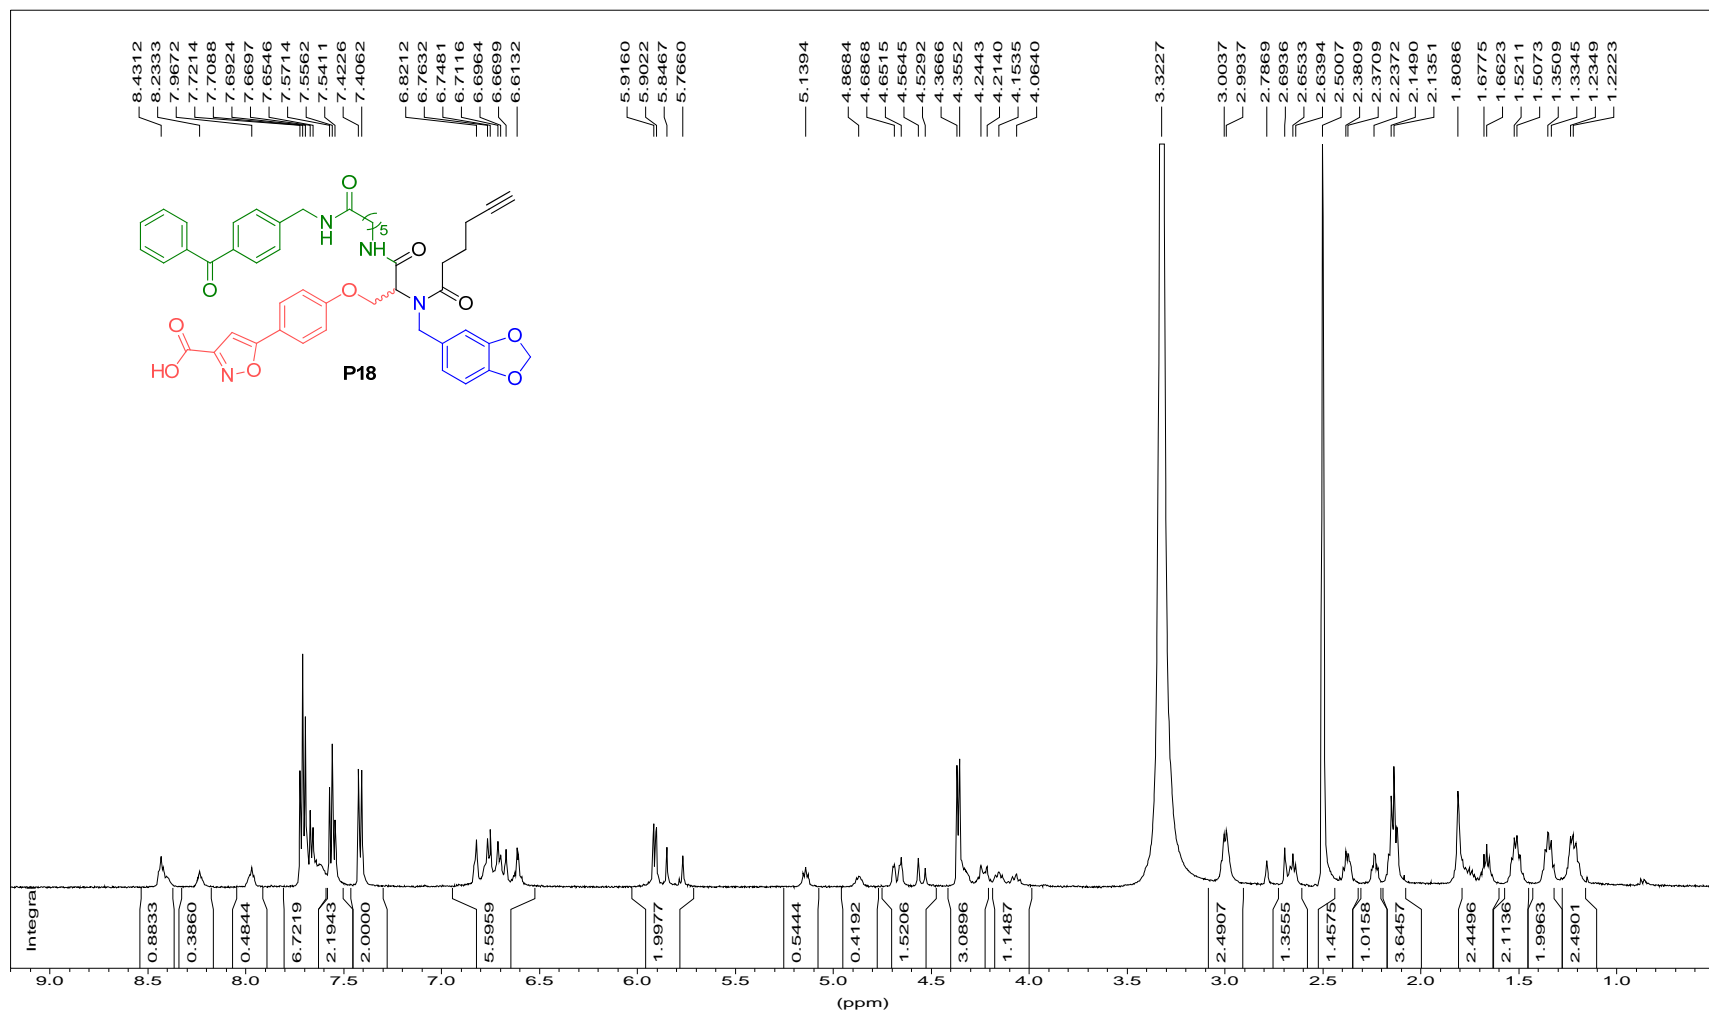



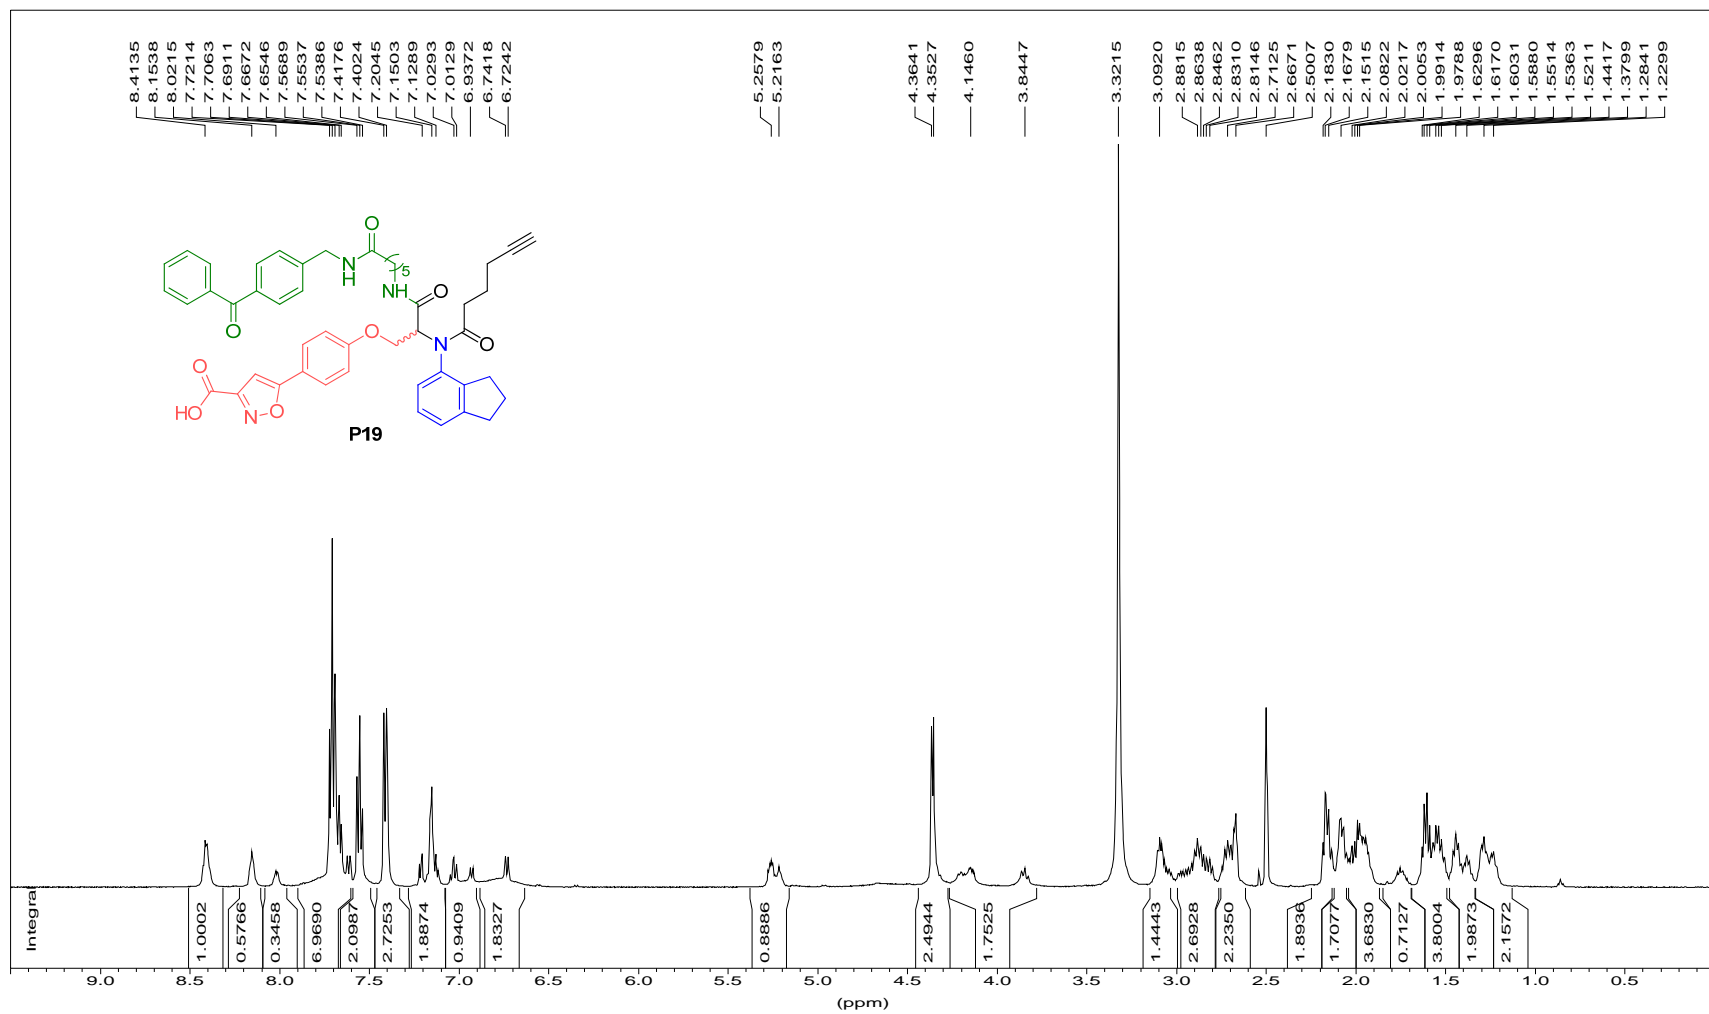

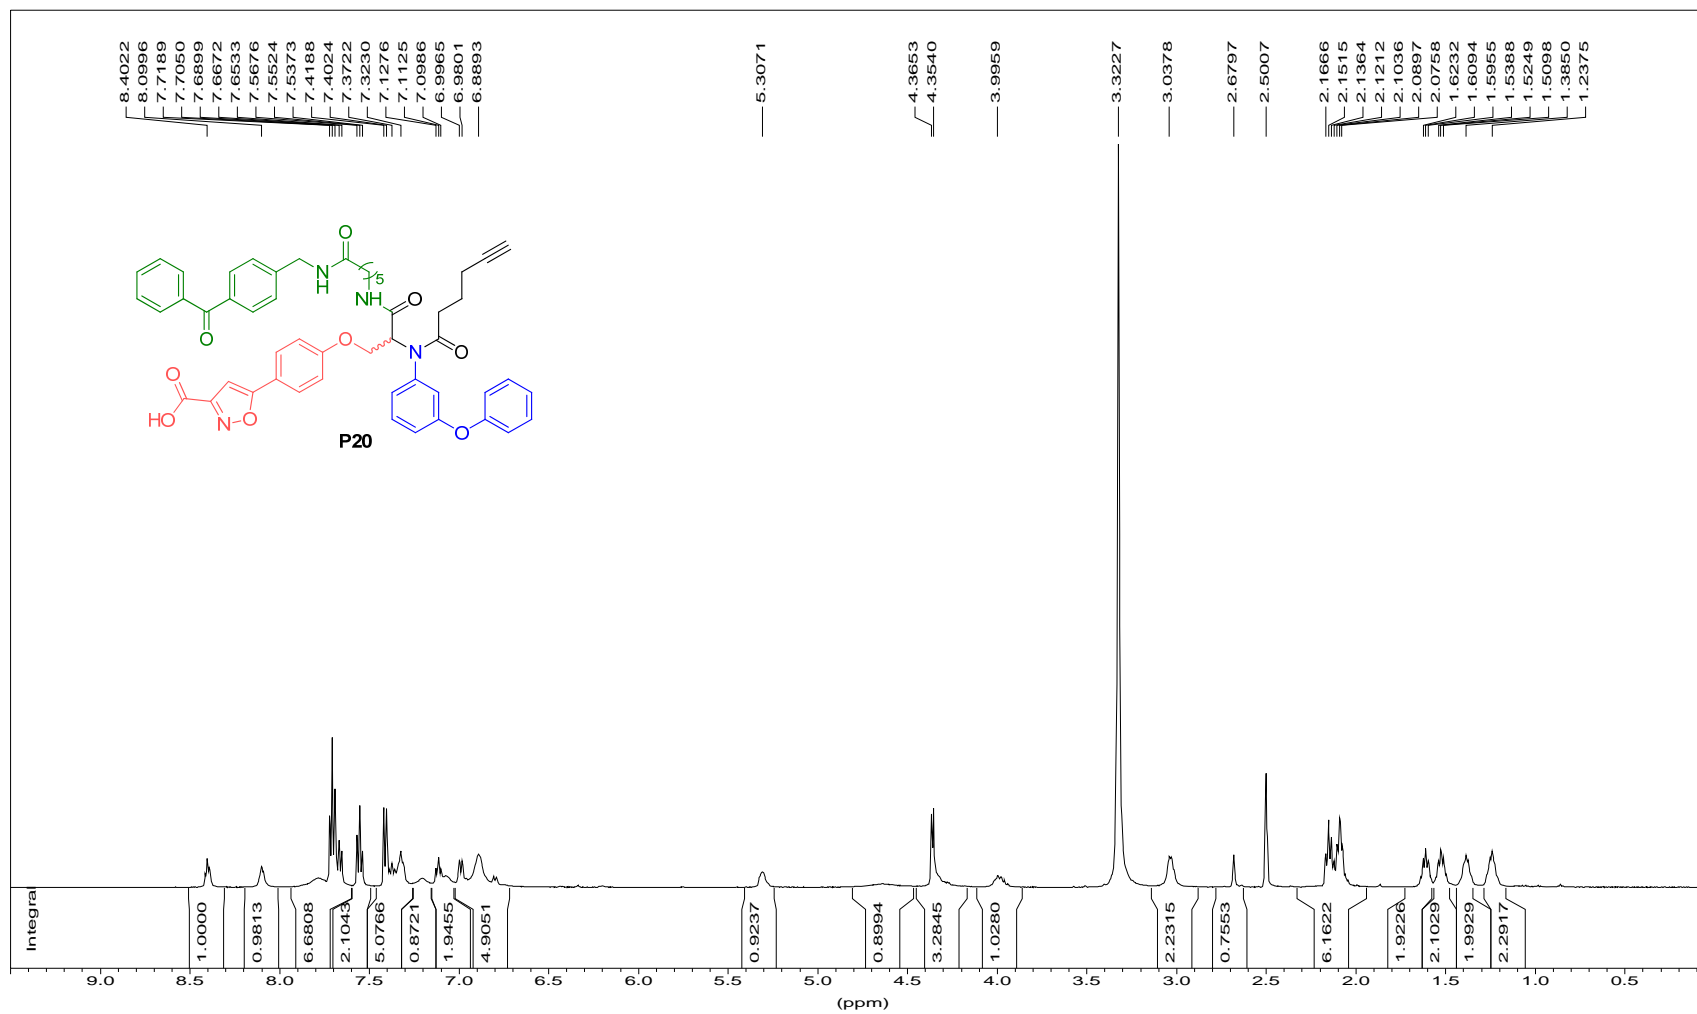

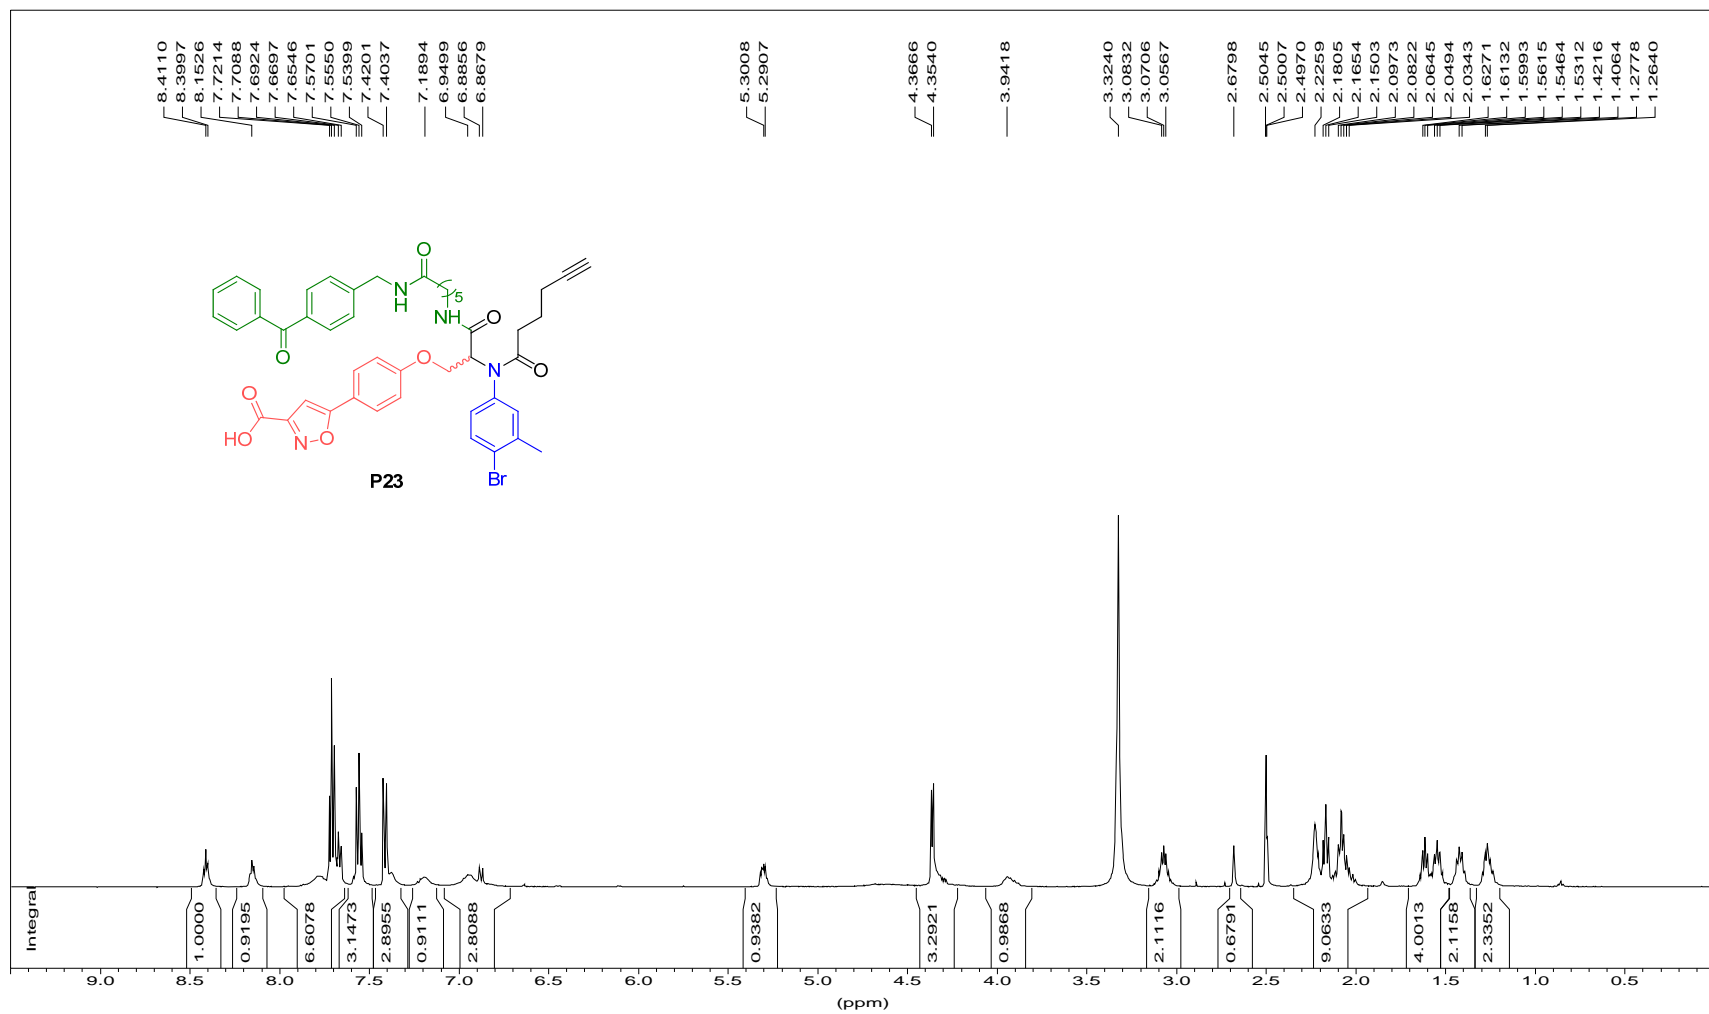

|               | Name                                                                         | M.W.   | Score | Queries m | emPAI | Family                                               |
|---------------|------------------------------------------------------------------------------|--------|-------|-----------|-------|------------------------------------------------------|
| IPI00219005.3 | FKBP4 FK506-binding protein 4                                                | 52057  | 738   | 29        | 3.14  | immunophilin protein family                          |
| IPI00156689.3 | VAT1 Synaptic vesicle membrane protein VAT-1 homolog                         | 42122  | 387   | 7         | 0.31  | zinc-containing alcohol dehydrogenase family         |
| IPI00295400.1 | WARS Tryptophanyl-tRNA synthetase, cytoplasmic                               | 53474  | 354   | 10        | 0.45  | class-I aminoacyl-tRNA synthetase family             |
| IPI00011229.1 | CTSD Cathepsin D precursor                                                   | 45037  | 338   | 13        | 0.46  | peptidase family                                     |
| IPI00014151.3 | PSMD6 26S proteasome non-ATPase regulatory subunit 6                         | 45787  | 313   | 16        | 1.1   | proteasome subunit S10 family                        |
| IPI00216308.5 | VDAC1 Voltage-dependent anion-selective channel protein 1                    | 30868  | 289   | 9         | 0.85  | eukaryotic mitochondrial porin family                |
| IPI00220503.9 | DCTN2 dynactin 2                                                             | 44906  | 275   | 8         | 0.46  | dynactin subunit 2 family                            |
| IPI00006865.3 | SEC22B Vesicle-trafficking protein SEC22b                                    | 24896  | 271   | 7         | 1.13  | synaptobrevin family                                 |
| IPI00026154.2 | PRKCSH Glucosidase 2 subunit beta precursor                                  | 60357  | 251   | 6         | 0.15  |                                                      |
| IPI00009032.1 | SSB Lupus La protein                                                         | 46979  | 245   | 7         | 0.35  |                                                      |
| IPI00294380.5 | PCK2 Phosphoenolpyruvate carboxykinase [GTP], mitochondrial precursor        | 71447  | 242   | 7         | 0.25  | phosphoenolpyruvate carboxykinase [GTP] family.      |
| IPI00152441.3 | HM13 Isoform 1 of Minor histocompatibility antigen H13                       | 41747  | 229   | 10        | 0.58  | peptidase family                                     |
| IPI00008986.1 | SLC7A5 Large neutral amino acids transporter small subunit 1                 | 55659  | 223   | 6         | 0.11  | amino acid-polyamine-organocation (APC) superfamily  |
| IPI00218200.7 | BCAP31 B-cell receptor-associated protein 31                                 | 34901  | 217   | 7         | 0.89  | BCAP29/BCAP31 family                                 |
| IPI00785096.2 | BZW1 similar to basic leucine zipper and W2 domains 1                        | 51420  | 208   | 15        | 0.55  | BZW family                                           |
| IPI00031812.3 | YBX1 Nuclease sensitive element-binding protein 1                            | 35903  | 208   | 5         | 0.17  | may involve in cancer                                |
| IPI00438229.2 | TRIM28 Isoform 1 of Transcription intermediary factor 1-beta                 | 90261  | 177   | 8         | 0.21  | TRIM/RBCC family                                     |
| IPI00029601.4 | CTTN Src substrate cortactin                                                 | 61896  | 175   | 7         | 0.32  |                                                      |
| IPI00008274.7 | CAP1 Adenylyl cyclase-associated protein 1                                   | 52222  | 173   | 5         | 0.18  | CAP family                                           |
| IPI00010896.3 | Chloride intracellular channel protein 1                                     | 27248  | 169   | 4         | 0.41  | chloride channel CLIC family.                        |
| IPI00030154.1 | PSME1 Proteasome activator complex subunit 1                                 | 28876  | 150   | 11        | 1.4   | PA28 family                                          |
| IPI00011107.2 | IDH2 Isocitrate dehydrogenase [NADP], mitochondrial precursor                | 51333  | 149   | 7         | 0.32  | isocitrate and isopropylmalate dehydrogenases family |
| IPI00005719.1 | RAB1A Isoform 1 of Ras-related protein Rab-1A                                | 22891  | 149   | 6         | 0.51  | Rab family                                           |
| IPI00002520.1 | SHMT2 Serine hydroxymethyltransferase, mitochondrial precursor               | 56414  | 147   | 5         | 0.22  | SHMT family                                          |
| IPI00027851.1 | HEXA Beta-hexosaminidase alpha chain precursor                               | 61106  | 145   | 9         | 0.32  | glycosyl hydrolase 20 family                         |
| IPI00027442.4 | AARS Alanyl-tRNA synthetase, cytoplasmic                                     | 107484 | 145   | 8         | 0.17  | class-II aminoacyl-tRNA synthetase family            |
| IPI00012303.2 | SELENBP1 Selenium-binding protein 1                                          | 52928  | 144   | 8         | 0.38  | selenium-binding protein family                      |
| IPI00025366.4 | CS Citrate synthase, mitochondrial precursor                                 | 51908  | 141   | 4         | 0.18  | citrate synthase family                              |
| IPI00215998.5 | CD63 CD63 antigen                                                            | 26474  | 140   | 10        | 0.81  | tetraspanin (TM4SF) family                           |
| IPI00010471.5 | LCP1 Plastin-2                                                               | 70815  | 135   | 5         | 0.22  | actin-binding proteins                               |
| IPI00028055.4 | TMED10 Transmembrane emp24 domain-containing protein 10 precursor            | 25131  | 133   | 6         | 0.65  | EMP24/GP25L family.                                  |
| IPI00550069.3 | Ribonuclease inhibitor                                                       | 51766  | 131   | 3         | 0.12  |                                                      |
| IPI00013122.1 | CDC37 Hsp90 co-chaperone Cdc37                                               | 44953  | 131   | 7         | 0.46  | CDC37 family                                         |
| IPI00016513.5 | RAB10 Ras-related protein Rab-10                                             | 22755  | 129   | 5         | 0.51  | Rab family                                           |
| IPI00414320.1 | Annexin A11                                                                  | 54697  | 127   | 7         | 0.3   | Annexin family                                       |
| IPI00004503.5 | LAMP1 lysosomal-associated membrane protein 1                                | 45367  | 126   | 6         | 0.32  | LAMP family                                          |
| IPI00003527.5 | SLC9A3R1 Ezrin-radixin-moesin-binding phosphoprotein 50                      | 39130  | 124   | 6         | 0.43  | solute carrier family                                |
| IPI00401264.5 | TXNDC4 Thioredoxin domain-containing protein 4 precursor                     | 47341  | 121   | 3         | 0.2   |                                                      |
| IPI00290416.3 | OLA1 Isoform 1 of Putative GTP-binding protein 9                             | 44943  | 121   | 6         | 0.37  | GTP1/OBG family                                      |
| IPI00105598.3 | PSMD11 Proteasome 26S non-ATPase subunit 11 variant (Fragment)               | 47790  | 120   | 3         | 0.19  | proteasome family.                                   |
| IPI00017334.1 | PHB Prohibitin                                                               | 29843  | 118   | 5         | 0.7   | prohibitin family.                                   |
| IPI00096066.2 | SUCLG2 Succinyl-CoA ligase [GDP-forming] beta-chain, mitochondrial precursor | 46824  | 116   | 4         | 0.27  | succinate/malate CoA ligase beta subunit family      |
| IPI00024664.1 | USP5 Isoform Long of Ubiquitin carboxyl-terminal hydrolase 5                 | 96638  | 116   | 5         | 0.09  | peptidase family                                     |
| IPI00100160.3 | CAND1 Isoform 1 of Cullin-associated NEDD8-dissociated protein 1             | 137999 | 115   | 7         | 0.12  | CAND family                                          |
| IPI00299024.9 | BASP1 Brain acid soluble protein 1                                           | 22680  | 111   | 5         | 0.74  | BASP1 family                                         |

|                |                                                                                        |        |     |   |      |                                                                 |
|----------------|----------------------------------------------------------------------------------------|--------|-----|---|------|-----------------------------------------------------------------|
| IPI00020719.2  | VISA Isoform 1 of Mitochondrial antiviral-signaling protein                            | 57063  | 110 | 4 | 0.16 |                                                                 |
| IPI00219913.10 | USP14 Ubiquitin carboxyl-terminal hydrolase 14                                         | 56489  | 109 | 4 | 0.22 | peptidase family                                                |
| IPI00382990.1  | DERP12                                                                                 | 38340  | 108 | 6 | 0.39 |                                                                 |
| IPI00031804.1  | VDAC3 Isoform 1 of Voltage-dependent anion-selective channel protein 3                 | 30981  | 108 | 3 | 0.23 | eukaryotic mitochondrial porin family                           |
| IPI00006211.4  | VAPB Isoform 1 of Vesicle-associated membrane protein-associated protein B/C           | 27439  | 107 | 6 | 0.77 | VAMP-associated protein family                                  |
| IPI00000690.1  | AIFM1 Isoform 1 of Apoptosis-inducing factor 1, mitochondrial precursor                | 67144  | 107 | 5 | 0.15 | FAD-dependent oxidoreductase family                             |
| IPI00216184.3  | PICALM Isoform 2 of Phosphatidylinositol-binding clathrin assembly protein             | 68892  | 106 | 2 | 0.09 |                                                                 |
| IPI00021258.2  | CNDP2 Cytosolic non-specific dipeptidase                                               | 41770  | 103 | 5 | 0.24 | peptidase family                                                |
| IPI00103599.1  | BRI3BP BRI3-binding protein                                                            | 27932  | 102 | 3 | 0.12 |                                                                 |
| IPI00297261.3  | PTPN1 Tyrosine-protein phosphatase non-receptor type 1                                 | 50505  | 101 | 5 | 0.25 | protein-tyrosine phosphatase family                             |
| IPI00221234.6  | ALDH7A1 Similar to Antiquitin                                                          | 59020  | 99  | 2 | 0.1  | aldehyde dehydrogenase family                                   |
| IPI00009822.1  | SRP54 Signal recognition particle 54 kDa protein                                       | 55953  | 99  | 4 | 0.23 | GTP-binding SRP family                                          |
| IPI00216318.5  | YWHAB Isoform Long of 14-3-3 protein beta/alpha                                        | 28179  | 98  | 4 | 0.4  | 14-3-3 family                                                   |
| IPI00000816.1  | YWHAE 14-3-3 protein epsilon                                                           | 29326  | 98  | 4 | 0.38 | 14-3-3 family                                                   |
| IPI00296215.1  | TACSTD1 Tumor-associated calcium signal transducer 1 precursor                         | 35582  | 97  | 3 | 0.17 | EPCAM family                                                    |
| IPI00219301.7  | MARCKS Myristoylated alanine-rich C-kinase substrate                                   | 31707  | 96  | 3 | 0.22 | MARCKS family.                                                  |
| IPI00002460.2  | ANXA7 Isoform 1 of Annexin A7                                                          | 52991  | 95  | 6 | 0.24 | annexin family                                                  |
| IPI00216520.1  | ARFIP1 Isoform A of Arfaptin-1                                                         | 38632  | 92  | 3 | 0.24 |                                                                 |
| IPI00329200.6  | RANBP5 127 kDa protein                                                                 | 127923 | 91  | 5 | 0.08 | importin beta family                                            |
| IPI00032140.4  | SERPINH1 Serpin H1 precursor                                                           | 46525  | 91  | 3 | 0.2  | serpin family                                                   |
| IPI00375704.1  | PSMB5 Putative uncharacterized protein DKFZp686I0180 (Fragment)                        | 28962  | 90  | 2 | 0.11 | peptidase family                                                |
| IPI00008223.3  | RAD23B UV excision repair protein RAD23 homolog B                                      | 43202  | 90  | 8 | 0.39 | RAD23 family                                                    |
| IPI00045511.1  | CLCC1 Isoform 1 of Chloride channel CLIC-like protein 1 precursor                      | 62667  | 87  | 4 | 0.11 | chloride channel MCLC family                                    |
| IPI00095891.2  | GNAS Isoform XLas-1 of Guanine nucleotide-binding protein G(s) subunit alpha isoform 1 | 111697 | 85  | 5 | 0.08 | G-alpha family                                                  |
| IPI00023504.1  | RAB3A Ras-related protein Rab-3A                                                       | 25196  | 85  | 3 | 0.28 | Rab family                                                      |
| IPI00021926.2  | PSMC6 26S protease regulatory subunit S10B                                             | 44430  | 85  | 3 | 0.21 | AAA ATPase family                                               |
| IPI00008475.1  | HMGCS1 Hydroxymethylglutaryl-CoA synthase, cytoplasmic                                 | 57828  | 85  | 5 | 0.16 | HMG-CoA synthase family                                         |
| IPI00024540.3  | SH3GLB2 Isoform 1 of SH3 domain GRB2-like protein B2                                   | 44175  | 84  | 4 | 0.21 | endophilin family                                               |
| IPI00021187.4  | RUVBL1 Isoform 1 of RuvB-like 1                                                        | 50538  | 84  | 5 | 0.25 | RuvB family                                                     |
| IPI00020436.4  | RAB11B Ras-related protein Rab-11B                                                     | 24588  | 84  | 3 | 0.46 | Rab family                                                      |
| IPI00014053.3  | TOMM40 Isoform 1 of Probable mitochondrial import receptor subunit TOM40 homolog 1     | 38211  | 83  | 4 | 0.34 | Tom40 family                                                    |
| IPI00007682.2  | ATP6V1A Vacuolar ATP synthase catalytic subunit A                                      | 68660  | 82  | 3 | 0.09 | ATPase alpha/beta chains family                                 |
| IPI00022334.1  | OAT Ornithine aminotransferase, mitochondrial precursor                                | 48846  | 81  | 3 | 0.19 | class-III pyridoxal-phosphate-dependent aminotransferase family |
| IPI00375441.2  | FUBP1 Isoform 1 of Far upstream element-binding protein 1                              | 67690  | 80  | 5 | 0.18 |                                                                 |
| IPI00220365.5  | EIF4G1 EIF4G1 variant protein (Fragment)                                               | 178843 | 77  | 4 | 0.06 |                                                                 |
| IPI00030131.3  | TMPO Isoform Beta of Lamina-associated polypeptide 2, isoforms beta/gamma              | 50696  | 77  | 3 | 0.18 | LEM family                                                      |
| IPI00027626.3  | CCT6A T-complex protein 1 subunit zeta                                                 | 58444  | 77  | 2 | 0.12 | TCP-1 chaperonin family                                         |
| IPI00013698.1  | ASAH1 Acid ceramidase precursor                                                        | 45077  | 77  | 2 | 0.15 | acid ceramidase family                                          |
| IPI00008167.1  | ATP1B3 Sodium/potassium-transporting ATPase subunit beta-3                             | 31834  | 77  | 2 | 0.22 | potassium ATPases subunit beta family                           |
| IPI00073772.5  | FBP1 Fructose-1,6-bisphosphatase 1                                                     | 37190  | 76  | 5 | 0.29 | FBPase class 1 family                                           |
| IPI00028004.2  | PSMB3 Proteasome subunit beta type-3                                                   | 23219  | 76  | 2 | 0.31 | peptidase family                                                |
| IPI00027444.1  | SERPINB1 Leukocyte elastase inhibitor                                                  | 42829  | 76  | 2 | 0.14 | serpin family                                                   |
| IPI00384280.5  | PCYOX1 Prenylcysteine oxidase 1 precursor                                              | 57003  | 75  | 4 | 0.22 | prenylcysteine oxidase family                                   |
| IPI00107357.6  | CLPTM1 Isoform 2 of Cleft lip and palate transmembrane protein 1                       | 79791  | 74  | 2 | 0.07 | CLPTM1 family                                                   |
| IPI00021983.1  | NCSTN Isoform 1 of Nicastrin precursor                                                 | 79103  | 74  | 4 | 0.18 | nicastrin family                                                |
| IPI00012102.1  | GNS N-acetylglucosamine-6-sulfatase precursor                                          | 62840  | 74  | 3 | 0.15 | sulfatase family                                                |

MCR\_SI\_MS Results

|               |                                                                               |        |    |   |      |                                       |
|---------------|-------------------------------------------------------------------------------|--------|----|---|------|---------------------------------------|
| IPI00296191.1 | ATP6V1H Isoform 1 of Vacuolar ATP syntha                                      | 56417  | 73 | 2 | 0.05 | V-ATPase H subunit family             |
| IPI00784119.1 | ATP6AP1 Vacuolar ATP synthase subunit S1 precursor                            | 52164  | 72 | 4 | 0.24 | vacuolar ATPase subunit S1 family     |
| IPI00299095.2 | SNX2 Sorting nexin-2                                                          | 58549  | 72 | 3 | 0.18 | sorting nexin family                  |
| IPI00024911.1 | ERP29 Endoplasmic reticulum protein ERp29 precursor                           | 29032  | 72 | 4 | 0.54 |                                       |
| IPI00013895.1 | S100A11 Protein S100-A11                                                      | 11847  | 72 | 3 | 0.66 | S-100 family                          |
| IPI00465128.3 | BAT3 Isoform 1 of Large proline-ric                                           | 120639 | 71 | 3 | 0.08 |                                       |
| IPI00396370.5 | F3B Isoform 1 of Eukaryotic translation initi                                 | 92833  | 71 | 2 | 0.04 | eIF-3 subunit B family.               |
| IPI00171438.2 | TXNDC5;MUTED Thioredoxin domain-containing protein 5 precursor                | 48283  | 71 | 5 | 0.26 | protein disulfide isomerase family    |
| IPI00141318.2 | CKAP4 Isoform 1 of Cytoskeleton-associated protein 4                          | 66097  | 70 | 6 | 0.03 |                                       |
| IPI00000494.6 | RPL5 60S ribosomal protein L5                                                 | 34569  | 70 | 2 | 0.2  | ribosomal protein L18P family         |
| IPI00021728.3 | EIF2S2 Eukaryotic translation initiation factor 2 subunit 2                   | 38706  | 69 | 2 | 0.16 | eIF-2-beta/eIF-5 family.              |
| IPI00021766.4 | RTN4 Isoform 1 of Reticulon-4                                                 | 130420 | 68 | 5 | 0.09 |                                       |
| IPI00010740.1 | PPT1 Palmitoyl-protein thioesterase 1 precursor                               | 76216  | 68 | 4 | 0.13 | palmitoyl-protein thioesterase family |
| IPI00003818.1 | KYNU Kynureninase                                                             | 52831  | 68 | 2 | 0.13 | kynureninase family.                  |
| IPI00024502.2 | UBQLN4 Ubiquilin-4                                                            | 63869  | 67 | 2 | 0.05 |                                       |
| IPI00217766.3 | SCARB2 Lysosome membrane protein 2                                            | 54712  | 62 | 3 | 0.11 | CD36 family                           |
| IPI00016255.4 | FLJ22662 hypothetical protein LOC79887                                        | 63499  | 62 | 2 | 0.09 | phospholipase B-like family           |
| IPI00419237.3 | LAP3 Isoform 1 of Cytosol aminopeptidase                                      | 56530  | 61 | 2 | 0.11 | peptidase family                      |
| IPI00009960.6 | IMMT Isoform 1 of Mitochondrial inner membrane proteir                        | 84026  | 61 | 4 | 0.11 |                                       |
| IPI00305383.1 | UQCRC2 Ubiquinol-cytochrome-c reductase complex core protein 2, mitochondrial | 48584  | 59 | 2 | 0.12 | peptidase family                      |
| IPI00009030.1 | LAMP2 Isoform LAMP-2A of Lysosome-associated membrane glycoprotein 2 precu    | 45503  | 59 | 2 | 0.13 | LAMP family                           |
| IPI00009104.7 | RUVBL2 RuvB-like 2                                                            | 51296  | 58 | 2 | 0.12 | peptidase family                      |
| IPI00217960.1 | PRKACA Isoform 2 of cAMP-dependent protein kinase, alpha-catalytic subunil    | 39911  | 55 | 2 | 0.15 | protein kinase superfamily            |
